# Supplementary material for: Study protocol for a prospective cohort study examining the predictive potential of dynamic symptom networks for the onset and progression of psychosis: the Mapping Individual Routes of Risk and Resilience (Mirorr) study
Source: PubMed Central journal article supplement — BMJ Open. 2018 Jan 21;8(1):e019059. doi: 10.1136/bmjopen-2017-019059 (PMC5781162; doi:10.1136/bmjopen-2017-019059), 2018-01-21
Supplement: bmjopen-2017-019059.draft_revisions.pdf [file bmjopen-2017-019059.draft_revisions.pdf]

# BMJ Open

BMJ Open is committed to open peer review. As part of this commitment we make the peer review history of every article we publish publicly available.

When an article is published we post the peer reviewers' comments and the authors' responses online. We also post the versions of the paper that were used during peer review. These are the versions that the peer review comments apply to.

The versions of the paper that follow are the versions that were submitted during the peer review process. They are not the versions of record or the final published versions. They should not be cited or distributed as the published version of this manuscript.

BMJ Open is an open access journal and the full, final, typeset and author-corrected version of record of the manuscript is available on our site with no access controls, subscription charges or pay-per-view fees (<http://bmjopen.bmj.com>).

If you have any questions on BMJ Open's open peer review process please email [editorial.bmjopen@bmj.com](mailto:editorial.bmjopen@bmj.com)

# BMJ Open

## A study protocol for a prospective cohort study examining the predictive potential of dynamic symptom networks for the onset and progression of psychosis: The Mapping Individual Routes of Risk and Resilience (Mirorr) study

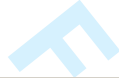

|                                 |                                                                                                                                                                                                                                                                                                                                                                                                                                                                                                                                                                                                                                                                                                                                                                                                                                                                         |
|---------------------------------|-------------------------------------------------------------------------------------------------------------------------------------------------------------------------------------------------------------------------------------------------------------------------------------------------------------------------------------------------------------------------------------------------------------------------------------------------------------------------------------------------------------------------------------------------------------------------------------------------------------------------------------------------------------------------------------------------------------------------------------------------------------------------------------------------------------------------------------------------------------------------|
| Journal:                        | <i>BMJ Open</i>                                                                                                                                                                                                                                                                                                                                                                                                                                                                                                                                                                                                                                                                                                                                                                                                                                                         |
| Manuscript ID                   | bmjopen-2017-019059                                                                                                                                                                                                                                                                                                                                                                                                                                                                                                                                                                                                                                                                                                                                                                                                                                                     |
| Article Type:                   | Protocol                                                                                                                                                                                                                                                                                                                                                                                                                                                                                                                                                                                                                                                                                                                                                                                                                                                                |
| Date Submitted by the Author:   | 14-Aug-2017                                                                                                                                                                                                                                                                                                                                                                                                                                                                                                                                                                                                                                                                                                                                                                                                                                                             |
| Complete List of Authors:       | Booij, Sanne; University of Groningen, University Medical Center Groningen, Interdisciplinary Center Psychopathology and Emotion regulation<br>Wichers, Marieke; University of Groningen, University Medical Center Groningen, Interdisciplinary Center Psychopathology and Emotion regulation<br>de Jonge, Peter; University of Groningen, Department of Developmental Psychology<br>Sytéma, Sjoerd; University of Groningen, University Medical Center Groningen, Interdisciplinary Center Psychopathology and Emotion regulation<br>van Os, Jim; Maastricht University Medical Centre, Psychiatry and Medical Psychology<br>Wunderink, Lex; Friesland Mental Health Services, Department of Research and Education<br>Wigman, Johanna; University of Groningen, University Medical Center Groningen, Interdisciplinary Center Psychopathology and Emotion regulation |
| <b>Primary Subject Heading</b>: | Mental health                                                                                                                                                                                                                                                                                                                                                                                                                                                                                                                                                                                                                                                                                                                                                                                                                                                           |
| Secondary Subject Heading:      | Mental health                                                                                                                                                                                                                                                                                                                                                                                                                                                                                                                                                                                                                                                                                                                                                                                                                                                           |
| Keywords:                       | PSYCHIATRY, Child & adolescent psychiatry < PSYCHIATRY, Schizophrenia & psychotic disorders < PSYCHIATRY, MENTAL HEALTH                                                                                                                                                                                                                                                                                                                                                                                                                                                                                                                                                                                                                                                                                                                                                 |
|                                 |                                                                                                                                                                                                                                                                                                                                                                                                                                                                                                                                                                                                                                                                                                                                                                                                                                                                         |

SCHOLARONE™  
Manuscripts

1  
2  
3 1 **Title: A study protocol for a prospective cohort study examining the predictive potential of**  
4  
5  
6 2 **dynamic symptom networks for the onset and progression of psychosis: The Mapping**  
7  
8 3 **Individual Routes of Risk and Resilience (Mirorr) study**

9  
10 4 Sanne H. Booij<sup>1,2\*</sup>, Marieke Wichers<sup>1</sup>, Peter de Jonge<sup>1,3</sup>, Sjoerd Sytema<sup>1</sup>, Jim van Os<sup>4,5</sup>, Lex  
11  
12 5 Wunderink<sup>1,2</sup>, Johanna T.W. Wigman<sup>1,2</sup>

13  
14  
15  
16  
17  
18 7 <sup>1</sup> Interdisciplinary Centre Psychopathology and Emotion regulation, Department of Psychiatry,  
19  
20 8 University of Groningen, University Medical Centre Groningen, CC72, P.O. Box 30.001, 9700  
21  
22 9 RB Groningen, The Netherlands

23  
24 10 <sup>2</sup> Department of Research and Education, Friesland Mental Health Services, PO Box 932, 8901  
25  
26  
27 11 Leeuwarden, The Netherlands

28  
29 12 <sup>3</sup> Department of Developmental Psychology, Research Program Interdisciplinary Center  
30  
31 13 Psychopathology and Emotion Regulation, University of Groningen, Grote Kruisstraat 2/1  
32  
33 14 9712 TS, Groningen, The Netherlands

34  
35  
36 15 <sup>4</sup> Department of Psychiatry and Psychology, School of Mental Health and Neuroscience,  
37  
38 16 EURON, Maastricht University Medical Centre, P.O. Box 616, 6200 MD, Maastricht, The  
39  
40 17 Netherlands

41  
42  
43 18 <sup>5</sup> King's College London, King's Health Partners, Department of Psychosis Studies, Institute of  
44  
45 19 Psychiatry, London, UK

46  
47  
48 20  
49  
50 21 \* Corresponding author

51  
52  
53 22 S.H. Booij, Interdisciplinary Centre Psychopathology and Emotion regulation (ICPE),  
54  
55 23 University of Groningen, University Medical Centre Groningen,

1  
2  
3 24 P.O. Box 30.001, 9700 RB, Groningen, The Netherlands  
4

5 25 Telephone: +31-50-3615733, Fax: +31-50-3619722, E-mail: [s.h.booiij@umcg.nl](mailto:s.h.booiij@umcg.nl)  
6  
7

8 26  
9

10 27 E-mail co-authors:  
11

12 28 Marieke Wichers: [m.c.wichers@umcg.nl](mailto:m.c.wichers@umcg.nl)  
13

14 29 Peter de Jonge: [peter.de.jonge@rug.nl](mailto:peter.de.jonge@rug.nl)  
15  
16

17 30 Sjoerd Sytema: [s.sytema@umcg.nl](mailto:s.sytema@umcg.nl)  
18  
19

20 31 Jim van Os: [j.vanos@maastrichtuniversity.nl](mailto:j.vanos@maastrichtuniversity.nl)  
21

22 32 Lex Wunderink: [lex.wunderink@ggzfriesland.nl](mailto:lex.wunderink@ggzfriesland.nl)  
23

24 33 Johanna T.W. Wigman: [j.t.w.wigman@umcg.nl](mailto:j.t.w.wigman@umcg.nl)  
25  
26

27 34  
28  
29  
30  
31  
32  
33  
34  
35  
36  
37  
38  
39  
40  
41  
42  
43  
44  
45  
46  
47  
48  
49  
50  
51  
52  
53  
54  
55  
56  
57  
58  
59  
60

1  
2  
3 35 **Abstract** (295 words)  
4  
5  
6 36  
7

8 37 Introduction: Our current ability to predict the course and outcome of early psychotic symptoms  
9  
10 38 is limited, hampering timely treatment. To improve our understanding of the development of  
11  
12 39 psychosis, a different approach to psychopathology may be productive. We propose to re-  
13  
14 40 conceptualize psychopathology from a network perspective, according to which symptoms act as  
15  
16 41 a dynamic, interconnected system, impacting on each other over time and across diagnostic  
17  
18 42 boundaries to form symptom networks. Adopting this network approach, the Mapping Individual  
19  
20 43 Routes of Risk and Resilience (Mirorr) study aims to determine whether characteristics of  
21  
22 44 symptom networks can predict illness course and outcome of early psychotic symptoms.  
23  
24  
25  
26  
27 45

28  
29 46 Methods and analysis: The sample consists of N=100 participants aged 18-35 years, divided into  
30  
31 47 four subgroups (N=4x25) with increasing levels of severity of psychopathology, representing  
32  
33 48 successive stages of clinical progression. Individuals representing the initial stage have a  
34  
35 49 relatively low expression of psychotic experiences (general population), whereas individuals  
36  
37 50 representing the end stage are help-seeking and display a psychometric expression of psychosis,  
38  
39 51 putting them at ultra-high risk for transition to psychotic disorder. At baseline and 1-year follow-  
40  
41 52 up, participants report their symptoms, affective states and experiences for three consecutive  
42  
43 53 months in short, daily questionnaires on their smartphone, which will be used to map individual  
44  
45 54 networks. Network parameters, including the strength and directionality of symptom connections  
46  
47 55 and centrality indices, will be estimated, and associated to individual differences in and within-  
48  
49 56 individual progression through stages of clinical severity and functioning over the next three  
50  
51 57 years.  
52  
53  
54  
55  
56  
57  
58  
59  
60

1  
2  
3 58  
4  
5  
6 59 Ethics and dissemination: The study has been approved by the local medical ethical committee  
7  
8 60 (ABR no. NL52974.042.15). The results of the study will be published in (inter)national peer-  
9  
10 61 reviewed journals, presented at research, clinical and general public conferences. The results will  
11  
12 62 assist in improving and fine-tuning dynamic models of psychopathology, stimulating both  
13  
14 63 clinical and scientific progress.  
15  
16  
17  
18 64

19  
20 65 Trial registration:

21  
22 66 Netherlands Trial Register NTR6205, Registered 27 October 2016.

23  
24 67 <http://www.trialregister.nl/trialreg/admin/rctview.asp?TC=6205>  
25  
26  
27 68

28  
29 69 Strengths and limitations of this study:

- 30  
31  
32 70 • One of the first studies examining the predictive potential of dynamic symptoms  
33  
34 71 networks for the onset and progression of psychopathology  
35  
36 72 • The study design allows considering within- and between-individual variation in  
37  
38 73 symptomatology, both at the micro (day) and macro (year) level  
39  
40 74 • A developmental, transdiagnostic approach is adopted; outcome measures include clinical  
41  
42 75 stage, diagnosis, symptoms of a broad range of disorders and functioning  
43  
44 76 • With three yearly follow-ups, we may not capture all transitions to psychosis  
45  
46 77 • The exploratory nature of the study warrants replication of the findings  
47  
48  
49  
50  
51 78  
52  
53 79  
54  
55 80  
56  
57  
58  
59  
60

1  
2  
3 81 Words (main text): 4833  
4  
5

6 82  
7  
8  
9  
10  
11  
12  
13  
14  
15  
16  
17  
18  
19  
20  
21  
22  
23  
24  
25  
26  
27  
28  
29  
30  
31  
32  
33  
34  
35  
36  
37  
38  
39  
40  
41  
42  
43  
44  
45  
46  
47  
48  
49  
50  
51  
52  
53  
54  
55  
56  
57  
58  
59  
60

For peer review only

## 83 Introduction

84 Psychotic disorders are among the most severe mental disorders in terms of individual and  
85 societal impact [1, 2]. Therefore, early detection and intervention in psychosis should be highly  
86 prioritized [3], which is increasingly acknowledged [4]. Psychosis is currently conceptualized as  
87 a continuum of psychotic severity, encompassing both subclinical and clinical expression [5]. As  
88 such, psychotic symptoms do not only present in the context of psychotic disorders, but also  
89 across other, non-psychotic disorders [6, 7].

90  
91 Current diagnostic systems in psychiatry are challenged by issues such as high levels of  
92 comorbidity, clinical heterogeneity, non-specific treatment effects, and lack of diagnosis-specific  
93 biological/ cognitive markers [8-12]. Despite this, traditional diagnoses still dominate psychiatric  
94 research, hampering scientific progress. These diagnoses are based on clinical presentation of  
95 adults with long-established illness [13], and classify individuals according to distinct diagnostic  
96 labels [8] (e.g. schizophrenia or major depressive disorder). However, it is increasingly  
97 acknowledged that psychopathology is expressed dimensionally, representing a quantitative as  
98 well as qualitative deviations from mental health [8, 14-19]. In addition, it is increasingly  
99 accepted that mental disorders do not emerge fully formed in adulthood but evolve gradually,  
100 often manifesting for the first time already in adolescence [20, 21].

101  
102 A model that was designed to capture this continuity of both severity and time is the clinical  
103 staging model [22, 23]. This model describes psychopathology as ranging, through subsequent  
104 but qualitatively different stages, from increased risk of mental illness at the lowest level through  
105 progressive stages of severity, resulting in separable but overlapping syndromes at the highest



1  
2  
3 106 levels [24, 25]. Stage 0 represents individuals at increased risk without symptoms; Stage 1a  
4  
5 107 represents ‘help-seeking’ individuals with mild, non-specific symptoms; Stage 1b represents  
6  
7  
8 108 individuals with an ‘attenuated syndrome’, with moderate but subthreshold symptoms and  
9  
10 109 moderate functional decline; Stage 2 holds individuals with a first episode of a clinical,  
11  
12 110 ‘discrete’, disorder; Stage 3 holds individuals with persistent or recurrent illness [13, 22, 23] and  
13  
14 111 Stage 4 represents individuals with chronic illness. This clinical staging model further  
15  
16 112 hypothesizes that psychopathological expression is more multi-dimensional, non-specific and  
17  
18 113 more susceptible to intervention in early stages and becomes more crystallized, disorder specific  
19  
20 114 and treatment-resistant in later stages [25]. This model offers a theoretical representation that  
21  
22 115 seems to fit better to the true nature and development of psychopathology [9-11, 26], and hence  
23  
24 116 may improve diagnostic accuracy. First investigations of the model seem promising, but more  
25  
26 117 empirical research is needed [27]. It has been developed most extensively in the context of  
27  
28 118 psychosis [23, 25, 28], but needs thorough empirical validation, since many questions still  
29  
30 119 remain, e.g. about what drives progression through subsequent stages and how the thresholds  
31  
32 120 between the stages should be defined exactly.  
33  
34  
35  
36  
37  
38  
39  
40

41 122 The expression and development of early psychotic symptoms are highly variable [29-32] and  
42  
43 123 difficult to predict [33, 34]. One reason for this is that many studies so far have focused on early  
44  
45 124 psychotic symptoms as specific predictors of later schizophrenia. However, this approach may be  
46  
47 125 too narrow [25, 31, 35] because early psychotic symptoms are often transitory [36-38], also  
48  
49 126 occur in the context of [6, 7, 39-41] and predict other mental disorders [33, 36, 42, 43], and vice  
50  
51 127 versa [44-46]. High levels of comorbidity [47] and overlap of risk factors [48-51] also challenge  
52  
53 128 the assumed independence of psychosis from other symptom domains. In addition, the  
54  
55  
56  
57  
58  
59  
60

1  
2  
3 129 information that is used to predict course and outcome is often based on cross-sectional  
4  
5 130 assessment of symptoms and comparisons are often made at the group level. However,  
6  
7  
8 131 symptoms can vary substantially over time, both over short (i.e. days) and long intervals  
9  
10 132 (months, years), within one individual, and can also cross diagnostic borders [52]. This means  
11  
12  
13 133 that the clinical picture can change, particularly in the early phase of a disorder [25]. These  
14  
15 134 characteristics of psychopathology suggest that the 'static' model prediction may not be fit for  
16  
17 135 the purpose. This is reflected in the modest accuracy and replicability of static prediction models  
18  
19  
20 136 in the psychosis prediction field [53-55].  
21

22 137

### 23 24 138 *The Mirorr study*

25  
26  
27 139 The above-mentioned challenges may be overcome by taking a different approach towards the  
28  
29 140 conceptualization of psychopathology, its measurement and the way we model it. By taking a  
30  
31 141 more transdiagnostic approach, incorporating symptoms and experiences from multiple  
32  
33 142 (psychotic and non-psychotic) domains, the narrow focus on the sole dimension of psychosis can  
34  
35  
36 143 be broadened. By modelling individual patterns of symptom patterns over time, a more  
37  
38 144 developmental as well as a more personalized approach can be taken that, in addition, builds on a  
39  
40 145 more detailed inventory of symptomatology compared to baseline (cross-sectional) assessment  
41  
42  
43 146 scores. Modelling the interconnectivity between symptoms by mapping individual symptom  
44  
45  
46 147 networks and patterns of co-occurrence in and over time could provide us with a better idea of  
47  
48 148 how psychopathology develops and may give us clues on what processes may drive progression  
49  
50  
51 149 through subsequent clinical stages [56, 57]. To investigate these aspects, we designed the  
52  
53 150 *Mapping Individual Routes of Risk and Resilience* (Mirorr) study.  
54

55 151  
56  
57  
58  
59  
60

1  
2  
3 152 *Aims and hypotheses*  
4

5 153 With the Mirorr study, we aim to investigate the hypothesis of dynamic symptom networks as  
6  
7  
8 154 the basis of psychopathology in general and psychosis in particular. Furthermore, we aim to  
9  
10 155 investigate the additional hypothesis of symptom networks as markers/indicators of progression  
11  
12 156 of illness through successive clinical stages. Taking a broader, multidimensional and process-  
13  
14 157 oriented approach, we will examine how symptoms of multiple domains influence each other  
15  
16 158 over time and across diagnostic boundaries, in interaction with environmental factors. More  
17  
18 159 specifically, we hypothesize that different clinical stages will be characterized by different  
19  
20 160 symptom networks. In addition, we expect that characteristics of these networks can predict  
21  
22 161 progression through clinical stages. We will explore the predictive potential of several  
23  
24 162 characteristics, such as the strength and directionality of symptom connections (see Figure 1) and  
25  
26 163 centrality indices (information about the position of a symptom in the network).  
27  
28  
29  
30  
31  
32  
33

34 165 The Mirorr study is unique in its design and in its attempt to (i) bring together a network  
35  
36 166 approach to psychopathology and the clinical staging model, (ii) take a broader perspective on  
37  
38 167 mental illness by (a) taking a transdiagnostic approach towards symptomatology and (b) defining  
39  
40 168 outcome in more broadly in the context of clinical staging (incorporating both clinical and  
41  
42 169 functional outcomes), and (iii) modelling individual symptom networks over time by using time-  
43  
44 170 series data, enabling us to model more personalized pathways of psychopathological  
45  
46 171 development.  
47  
48  
49  
50

51 172

52 173

53  
54  
55 174 *A network approach to psychopathology*  
56  
57  
58  
59  
60

1  
2  
3 175 A focus on dynamic symptom networks requires an innovative approach to psychopathology.  
4  
5  
6 176 One of the currently promising alternative approaches comes from network theory. From this  
7  
8 177 network perspective, psychopathology, at a phenomenological level, is hypothesized to result  
9  
10 178 from interactions between symptoms [11, 58, 59]. Mental disorders are thus represented by sets  
11  
12 179 of symptoms, connected in networks by causal relations [11, 58] (see also Figure 1). These  
13  
14 180 networks are dynamic and capture reciprocal influences between symptoms over time (e.g.,  
15  
16 181 feedback loops). Importantly, symptoms are acknowledged as causal factors in  
17  
18 182 psychopathological development: one symptom (e.g., anxiety) can cause another (e.g., paranoia).  
19  
20 183 This is in sharp contrast with current dominant models that represent symptoms as independent  
21  
22 184 indicators of underlying, latent constructs (e.g., schizophrenia). As stress is important in the  
23  
24 185 development of psychosis [60, 61], the sensitivity of symptom networks to risk-enhancing  
25  
26 186 (trauma) and risk-reducing (coping, social support) factors [62, 63] also needs attention. The  
27  
28 187 network approach has been successfully applied in other fields [64, 65], but is relatively novel in  
29  
30 188 psychiatry, where it has been investigated mainly in common mental disorders [66], but not  
31  
32 189 psychosis.  
33  
34  
35  
36  
37  
38  
39  
40

#### 41 *Outcome measures*

42  
43 192 Traditionally, research in the field of psychosis focuses mostly on transition from clinical high  
44  
45 193 risk to a first episode of psychosis [67]. However, there is growing awareness that this may be  
46  
47 194 arbitrary, especially in the context of a staging model that acknowledges expression of illness  
48  
49 195 along a much broader severity spectrum. In addition, functional outcome is becoming more and  
50  
51 196 more an important outcome of interest, as it has been shown that both clinical and functional  
52  
53 197 outcome are important but not always congruent [68-70]. Working from a clinical staging  
54  
55  
56  
57  
58  
59  
60

1  
2  
3 198 perspective, important outcomes to investigate include therefore progression through clinical  
4  
5  
6 199 stages, functioning and need for care.

7  
8 200

9  
10 201 Please insert Figure 1 here.

11  
12 202

13  
14  
15 203 *Objectives*

16  
17 204 Primary Objective:

18  
19  
20 205 To investigate whether symptom networks can characterize different clinical stages and predict  
21  
22 206 progression through subsequent stages, and whether there is a unique role of psychotic symptoms  
23  
24 207 within these networks in a sample of young adults (18-35 years) with increased risk for  
25  
26  
27 208 psychosis. For this purpose, we examine both within-individual changes and between-individual  
28  
29 209 differences in symptom networks and clinical stage.

30  
31  
32 210

33  
34 211 Secondary Objectives:

35  
36 212 1) To identify symptom networks that predict development of mental illness more accurately  
37  
38 213 than current models that are based on a cross-sectional assessment of symptom severity, which  
39  
40 214 have limited predictive accuracy;

41  
42  
43 215 2) To examine how risk and resilience factors for stress influence symptom networks. Examples  
44  
45 216 of risk factors are daily stress and early trauma; examples of resilience factors are coping  
46  
47 217 strategies, social support, physical activity and the experience of positive affect.

48  
49  
50 218

51  
52  
53 219

54  
55 220 **Methods and analysis**

1  
2  
3 221 *Study design*  
4

5 222 This study combines idiographic (within-person) and nomothetic (between-person) observational  
6  
7  
8 223 study designs. The nomothetic aspect of the study is captured by questionnaire and interview  
9  
10 224 data at baseline and three yearly follow measurement waves. Among other things,  
11  
12 225 symptomatology, functioning and need for care will be assessed (outcome measures), as well as  
13  
14 226 risk and protective factors. The idiographic aspect is captured by diary assessments at baseline  
15  
16 227 and the first follow-up wave. During the diary periods, participants will complete a diary  
17  
18 228 questionnaire daily for a period of 90 days on their smartphone, regarding symptoms, emotions,  
19  
20 229 functioning and stress. These diary data are used to map individual symptom networks. For the  
21  
22 230 second diary period, participants can also opt to keep continuing the questionnaire follow-ups,  
23  
24 231 but not have a second diary period. A flowchart of the study is presented in Figure 2.  
25  
26  
27  
28  
29  
30  
31  
32  
33

34 232  
35  
36 233 Please insert Figure 2 here.  
37  
38  
39  
40  
41  
42  
43  
44  
45  
46  
47  
48  
49  
50  
51  
52  
53  
54  
55  
56  
57  
58  
59  
60

36 235 *Study population*  
37

38 236 The total sample comprises of 175 individuals of 18-35 years, whereof 100 will enter the main  
39  
40 237 study (i.e. the daily diary study and the yearly follow-ups). For the main study, there will be four  
41  
42 238 subsamples, all n=25 (Figure 3) with each subgroup having an increasingly more severe  
43  
44 239 psychopathological level and thus representing subsequent clinical stages. For subsample 1  
45  
46 240 (lowest level of psychopathology and thus lowest clinical stage), 100 individuals will be  
47  
48 241 randomly selected from the general population in the North of the Netherlands and administered  
49  
50 242 the Community Assessment of Psychic Experiences (CAPE) [71]. Of all the respondents who  
51  
52 243 meet the inclusion and exclusion criteria of the study, the highest scoring quartile will be  
53  
54  
55  
56  
57  
58  
59  
60

1  
2  
3 244 included in the main study. For subsamples 2-4, individuals will be recruited from mental health  
4  
5 245 care institutions in the four Northern provinces in The Netherlands. For all individuals who are  
6  
7  
8 246 referred to mental health care, psychotic symptoms are routinely screened by means of, among  
9  
10 247 other things, the Prodromal Questionnaire (PQ) [72]. If the score on the PQ is 6 or higher, the  
11  
12 248 Comprehensive Assessment of At Risk Mental State (CAARMS) [73] is administered as well.  
13  
14 249 With these scores it is determined for which subsample (2-4, explained below) eligible subjects  
15  
16 250 will be recruited, where a higher subsample indicates higher levels of psychopathology.  
17  
18  
19  
20 251

21  
22 252 Please insert Figure 3 here.  
23  
24 253

25  
26  
27 254 In order to be eligible to participate in the study, subjects must meet all of the following criteria:  
28  
29 255 1) age between 18 and 35 years, 2) read and speak Dutch fluently, 3) capable of following the  
30  
31 256 research procedures, 4) provide Informed Consent. In addition, participants of subsample 1  
32  
33 257 should *not* be in clinical care for mental health at the moment of screening. In contrast,  
34  
35 258 participants of subsample 2-4 *should* currently be in clinical care for mental health. In addition,  
36  
37 259 participants of subsample 2 should have mild, non-psychotic psychopathology, as evidenced by a  
38  
39 260 score below 6 on the PQ, participants of subsample 3 should have mild psychopathology  
40  
41 261 including subclinical psychotic symptoms, as evidenced by a score of or above 6 on the PQ, but  
42  
43 262 are not at ultra-high risk (UHR) for psychosis, as indexed by the CAARMS. Finally, participants  
44  
45 263 of subsample 4 should be at UHR for psychosis, as indexed by the CAARMS. Exclusions criteria  
46  
47 264 are: 1) a history of or current psychotic episode, according to the Diagnostic and Statistical  
48  
49 265 manual of Mental Disorders-IV (DSM-IV) criteria; 2) significant hearing or visual problems  
50  
51 266 impairments; 3) pregnancy, as stated on a general health questionnaire.  
52  
53  
54  
55  
56  
57  
58  
59  
60

1  
2  
3 2674  
5  
6 268 *Procedure*7  
8 269 Recruitment

9  
10 270 To recruit subsample 1, the study will be announced at several university sites, public places in  
11  
12 271 Groningen, and social media (start recruitment: September 2015). Interested individuals can  
13  
14 272 contact the researchers by phone or e-mail for more information. They will then be sent an  
15  
16 273 information letter, flyer, informed consent form and the initial screenings questionnaires. After  
17  
18 274 receiving the completed screening questionnaires and informed consent forms, the 25 (out of  
19  
20 275 100) individuals with the highest CAPE scores will be invited to participate in the main study  
21  
22 276 (first inclusion: December 2015). For subsample 2-4, individuals will be recruited from mental  
23  
24 277 health care institutions in four northern Dutch provinces (first inclusion: April 2016). To which  
25  
26 278 subsample they will be recruited is determined using the instruments described under study  
27  
28 279 population. For these sites where patients give their consent for receiving information about  
29  
30 280 ongoing research projects, a package containing detailed information on the study (information  
31  
32 281 letter and flyer), along with screening questionnaires and an informed consent form will be send  
33  
34 282 to potential participants. Interested individuals can fill out and return requested forms (including  
35  
36 283 informed consent form). After receiving the requested forms, an individual's therapist will be  
37  
38 284 consulted about several exclusion criteria. For these sites where participants do not give consent  
39  
40 285 in advance, the individual's clinical worker will be provided a package containing detailed  
41  
42 286 information on the study (information letter and flyer), along with screening questionnaires and  
43  
44 287 an informed consent form. The clinical worker will pre-screen his/her client on the exclusion  
45  
46 288 criteria of the study and hand over the package if he/she fits the profile of the study. Study  
47  
48  
49  
50  
51  
52  
53  
54  
55  
56  
57  
58  
59  
60



1  
2  
3 289 participants can continue their therapy and medical treatment as usual; they will be asked to  
4  
5  
6 290 register any changes in medication or treatment during the daily ambulatory assessments.  
7

8 291

9  
10 292 Screening

11  
12 293 The information package that interested individuals receive contains an information letter, two  
13  
14  
15 294 screening questionnaires and an informed consent form. All potential participants can ask  
16  
17 295 questions before completing informed consent form or the screening questionnaires. As  
18  
19  
20 296 mentioned in the information letter, in case subjects should decide to participate, they should fill  
21  
22 297 out and send back these questionnaires and the informed consent form. This consent form covers  
23  
24 298 the baseline ambulatory assessment period and the yearly follow-up assessments (three in total).

25  
26  
27 299 On this consent form permission will be asked to re-invite subjects for the follow-up ambulatory  
28  
29 300 assessment period, for which they have to complete a separate consent form (one year later).

30  
31 301 Also, permission will be asked to use data from the psychiatric case register of the North of the  
32  
33  
34 302 Netherlands. The first screening questionnaire is a screening questionnaire on general health,  
35  
36 303 containing questions on demographics, health complaints (such as visual or hearing  
37  
38 304 impairments), pregnancy, drug and alcohol use, medication use, and mental health problems.

39  
40  
41 305 This will be used to screen on exclusion criteria. The second screening questionnaire is the  
42  
43  
44 306 CAPE. This instrument is used to screen individuals recruited from the general population  
45  
46 307 (subsample 1) on psychotic experiences but will be administered to all participants to enable  
47  
48 308 group comparisons on the level of subclinical psychotic experiences. The highest scoring quartile  
49  
50 309 (n=25) will subsequently be included in the main study. Subjects will have one week to decide  
51  
52 310 about participation.

53  
54  
55 311  
56  
57  
58  
59  
60

1  
2  
3 312 Baseline interview and ambulatory assessments (year one)  
4  
5  
6 313 If subjects are eligible to enter the study and agree to participate, they will be invited (by  
7  
8 314 telephone or e-mail) for an introduction interview at the University Medical Centre Groningen. A  
9  
10 315 few days before the interview, self-report questionnaires will be administered via email (see data  
11  
12 316 management for more information). The questionnaires assess symptomatology, functioning,  
13  
14 317 clinical stage, and factors of risk and resilience. During the interview, the study will be explained  
15  
16 318 to them in detail and a diagnostic psychiatric interview will be held. If in an exceptional case the  
17  
18 319 participant does not possess a smartphone, this will be provided to the participant during the  
19  
20 320 study period. An appointment for an end-of-study interview will be planned. Also, the  
21  
22 321 participants will be asked to designate suitable moments at which the researcher can call him/her  
23  
24 322 to inquire on the progression of the study and to help with any problems the participant may  
25  
26 323 experience.  
27  
28  
29  
30  
31

32 324  
33  
34 325 The participants then start completing the electronic daily diary for three months. Every evening,  
35  
36 326 they receive a text message with a link which directs them to a web-based diary questionnaire in  
37  
38 327 a secure environment. Measurements are always in the evening, asking about the past day; exact  
39  
40 328 times can vary per person (but not per day) and are fixed according to the participant's wishes.  
41  
42 329 However, *all* participants have 24 hours between each measurement point. For example,  
43  
44 330 participant A will always receive her text message at 22.00 and participant B always at 21.15. A  
45  
46 331 window of one and a half hour will be allowed to fill in the diary, and reminder messages will be  
47  
48 332 send every half hour. Short questions will be presented on sequential screens, which are mainly  
49  
50 333 answered using visual analogue scales. During the research period, participants are also provided  
51  
52 334 a paper log, in which they can note any unusual events, start of or changes in medication use and  
53  
54  
55  
56  
57  
58  
59  
60

1  
2  
3 335 problems they encounter with the research procedures. The researchers will telephone the  
4  
5  
6 336 participants six times during the study period (every other week), to motivate the participant,  
7  
8 337 answer questions about the study procedures and provide technical help. They will also be  
9  
10 338 available by telephone and e-mail if participants need help at other moments.  
11  
12

13 339  
14  
15 340 During the end-of-ambulatory-assessment (3 months after baseline) interview participants will  
16  
17 341 fill out an online questionnaire battery once more, and report on any changes in medical  
18  
19 342 treatment. Furthermore, they will also be asked to comment on the data collection and the study  
20  
21 343 in general. We will use this information to check whether the study affected their thoughts and  
22  
23 344 behaviours in any way, whether there had been special events that might have affected the data  
24  
25 345 collected.  
26  
27  
28

29 346  
30

31 347 Follow-up assessments  
32  
33

34 348 One, two and three years after baseline, all participants will receive questionnaires about  
35  
36 349 functioning and clinical stage via email. The participants will be able to fill these in at home.  
37  
38 350 Shortly after filling in the questionnaires, participants will be interviewed by telephone or face-  
39  
40 351 to-face at one of our research facilities, depending on their preferences, to establish the  
41  
42 352 presence/absence of psychiatric disorders with a diagnostic interview. In addition, to distinguish  
43  
44 353 individuals in clinical stage 1a from individuals in clinical stage 1b (all individuals with a score  
45  
46 354 of 6 or higher on the PQ-16), data from the CAARMS interview is needed. Participants will be  
47  
48 355 reminded about the follow-up assessments a few weeks before the actual follow-up by means of  
49  
50 356 an information letter.  
51  
52  
53  
54

55 357  
56  
57  
58  
59  
60

1  
2  
3 358 Follow-up ambulatory assessment period (year two)  
4

5 359 In the aforementioned information letter, participants will also read information about a second  
6  
7  
8 360 ambulatory assessment period that they can enrol in. If they are interested, they are invited for  
9  
10 361 another introduction interview (given that they still fulfil the in- and exclusion criteria as  
11  
12 362 evidenced by their answers to an online version of a general health questionnaire). This interview  
13  
14 363 is similar to the introduction interview at baseline (i.e., questionnaire battery and procedures). An  
15  
16 364 exception is that questionnaires about symptomatology, functioning and clinical stage will not be  
17  
18 365 administered, because they have been covered already by the usual follow-up assessments.  
19  
20 366 Participants then start their second three-month period of ambulatory assessments one year after  
21  
22 367 the first diary period. The end-of-ambulatory-assessment interview will take place, again with  
23  
24 368 similar questionnaires to the one held at baseline.  
25  
26  
27  
28  
29  
30  
31

### 32 370 *Instruments*

33  
34 371 A complete overview of the instruments used throughout the study is presented in Table 1.  
35  
36 372

37  
38  
39 373 Please insert Table 1 here.  
40  
41 374

### 42 43 375 *Diary measures*

44  
45 376 The items assessed in the daily questionnaires will be used to model individual networks of  
46  
47 377 symptoms, experiences and emotions. Items included in the dairy questionnaires were chosen  
48  
49 378 from a transdiagnostic perspective and cover a broad range of feelings and experiences that are  
50  
51 379 characteristic for (subclinical) psychotic experiences, depression, anxiety, mania, obsessive  
52  
53 380 compulsive behaviour and anger. These disorders are known for the co-occurrence of psychotic  
54  
55  
56  
57  
58  
59  
60

1  
2  
3 381 symptoms [6, 7] and comorbidity [47]. For the complete item list, see Additional file 1, Table  
4  
5 382 S1.

6  
7  
8 383  
9  
10 384 Positive psychotic experiences can be divided into five categories, namely paranoia, delusions,  
11  
12 385 hallucinations, megalomania, and paranormal beliefs [74]. Because paranormal beliefs are often  
13  
14  
15 386 stable over time, we will include items covering the first four categories. Negative symptoms of  
16  
17 387 psychosis will be covered by items about flattened affect (e.g., anhedonia, low motivation, social  
18  
19  
20 388 withdrawal), which resemble closely the negative symptoms of the CAPE. Most items are  
21  
22 389 adopted from previous ESM studies [75-77], and all items are adapted for daily use.

23  
24 390  
25  
26  
27 391 Symptoms of depression will be measured using items that correspond closely to the patient  
28  
29 392 health questionnaire (PHQ-9) [78], a self-administered questionnaire for screening and  
30  
31 393 measuring the severity of depression. Anxiety symptoms will be measured using items that  
32  
33 394 correspond closely to the Hospital Anxiety and Depression Scales – Anxiety (HADS-A) [79].  
34  
35 395 Mania, obsessive compulsive behaviour and anger are measured with items that correspond  
36  
37 396 closely to items from the DSM-V – screener for the corresponding clinical disorders [80].  
38

39  
40  
41 397  
42  
43 398 Positive and negative mood states over the past day will be measured with 12 items from the  
44  
45 399 circumplex model of affect [81, 82]. Momentary affect will be measured with an item for  
46  
47 400 valence (“I feel unpleasant – pleasant”) and activation (“I feel aroused/activated – quiet/still”) at  
48  
49 401 the beginning of each diary entry. Other items cover sleep, daily activities and situations that  
50  
51 402 may influence psychiatric symptoms, such as positive and negative events, social interactions,  
52  
53 403 coping behaviour, physical activity and drug use.  
54  
55  
56  
57  
58  
59  
60

1  
2  
3 404  
4  
5  
6 405 Follow-up measures  
7  
8 406 Important outcomes that are linked to the above described network characteristics are  
9  
10 407 (progression through) clinical stages, functioning and need for care. Progression through clinical  
11  
12 408 stages will be assessed with the PQ-16, the CAPE and the CAARMS, the Symptom Check List  
13  
14 409 (SCL-90) [83] and the Schedules for Clinical Assessment in Neuropsychiatry, short version  
15  
16 410 (mini-SCAN) [84]. Social functioning will be assessed using the Groningse Vragenlijst voor  
17  
18 411 Sociaal Gedrag (GVSG-45) [85] and the Flourishing Scale [86]. Need for care will be assessed  
19  
20 412 using self-reported information on care use. Additionally, need for care will be assessed by  
21  
22 413 linking data from the psychiatric case registry to our sample when approved by the participant  
23  
24 414 (as stated on the informed consent form). Specifically, the frequency and type of care use  
25  
26 415 throughout the study period will be obtained.  
27  
28  
29  
30  
31

#### 32 416 Assessments pre- and post-daily diary period(s)

33  
34 417 Before and after the daily diary assessments, several questionnaires will be administered to  
35  
36 418 assess symptomatology, functioning and several risk and resilience factors. Psychotic symptoms  
37  
38 419 will be assessed with the CAPE; depression and anxiety symptoms with the Depression Anxiety  
39  
40 420 and Stress Scale (DASS) [87]; mania symptoms with the Altman Self-Rating Mania Scale  
41  
42 421 (ASRM-NL) [88], social support with the Social Support List (SLL) [89]; resilience with the  
43  
44 422 Brief Resilience Scale (BRS) [90] and coping style with the Utrechtse Coping Lijst (UCL) [91].  
45  
46 423 Furthermore, physical activity levels will be tracked with an accelerometer, the ActiCal®  
47  
48 424 (Respironics, Bend, OR, USA), during the first two weeks of the second diary period. Output of  
49  
50  
51  
52  
53  
54  
55  
56  
57  
58  
59  
60

1  
2  
3 426 this instrument will be presented as Energy Expenditure and Metabolic Equivalent of Task. The  
4  
5  
6 427 physical activity measurements are added to serve as a pilot study, and are not obligatory.

7  
8 428  
9  
10 429 At baseline, sleep habits will be assessed with the Munich Chronotype Questionnaire (MCTQ)  
11  
12 430 [92] to optimize the diary assessment process. Also, potential confounders such as smoking,  
13  
14 431 alcohol/drug consumption, socio-economic status, Body Mass Index will be registered by means  
15  
16 432 of a general health questionnaire. In addition, stressful life events will be assessed, using the list  
17  
18 433 of threatening experiences [93]. Finally, pertaining to subgroup 4 only, social cognition will be  
19  
20 434 assessed using the Faux Pas Task [94] and bonding with parents will be assessed with the  
21  
22 435 Inventory of Parent and Peer Attachment (IPPA) [95, 96]. These factors may be of importance in  
23  
24 436 determining a transition from an UHR status to psychosis.

25  
26  
27  
28  
29 437

30  
31  
32 438

33  
34 439 *Data analysis plan*

35  
36 440 To map individual symptom networks of day-to-day symptom levels, multivariate time-series  
37  
38 441 analysis will be employed on each individual's time series data. Specifically, vector  
39  
40 442 autoregression (VAR) models will be applied [97]. These models are particularly suited for  
41  
42 443 investigating the temporal dynamics between two or more variables. The resulting associations  
43  
44 444 between symptoms will subsequently be presented as networks, and network parameters will be  
45  
46 445 estimated. These include (but are not limited to) the strength and directionality of symptom  
47  
48 446 connections (see Figure 1) and centrality indices (information about the position of a symptom in  
49  
50 447 the network). Next, symptom networks will be compared (i) across different subgroups of  
51  
52 448 severity and (ii) when the second diary period is completed, within each individual.

1  
2  
3 449  
4  
5  
6 450 In addition, a data-driven approach will be used to identify individuals with similar symptom  
7  
8 451 network characteristics by (1) qualitative network comparison, (2) quantitative comparison of  
9  
10 452 centrality indices [98, 99], and (3) longitudinal mixture models [100]. These subgroups will then  
11  
12 453 be compared on their levels of symptomatology and functioning and on course of  
13  
14 454 symptomatology over time. Furthermore, the predictive value of the network parameters will be  
15  
16 455 compared to the predictive value of usual predictors of illness course, namely cross-sectionally  
17  
18 456 assessed level of (subclinical) psychotic pathology. Specifically, sensitivity and specificity of  
19  
20 457 these network characteristics can be compared to sensitivity and specificity of baseline  
21  
22 458 subclinical levels of psychotic symptoms (CAPE) and general psychopathology (SCL-90).  
23  
24 459 Finally, risk and resilience factors, such as stressful events, social interactions, physical activity,  
25  
26 460 coping and resilience, may also influence symptoms and, importantly, their dynamics in the  
27  
28 461 network, but may do so differently in individuals with good or poor clinical and functional  
29  
30 462 outcome. The role of these factors will be addressed by including them in individual network  
31  
32 463 analyses to examine their direct and indirect impact on symptomatology and each other.  
33  
34 464 To control for potential confounding effects of demographic factors, such as sex, age and social  
35  
36 465 economic status, these variables will be added as covariates to all group level analyses.  
37  
38  
39  
40  
41  
42  
43  
44  
45

46 467 Based on previous work [101, 102], we expect no more than 10% missing data. Missing values  
47  
48 468 will be imputed with expectation-maximization imputation, following special recommendations  
49  
50 469 for time-series datasets [103]. A (two-sided) p-value of 0.05 is applied for statistical testing.  
51  
52

53 470

54  
55 471 *Sample size and power*  
56  
57  
58  
59  
60



1  
2  
3 472 Within-person analyses: constructing individual symptom networks  
4

5 473 Exact sample size calculations are not possible in studies using VAR, as it is typically unclear in  
6  
7  
8 474 such studies what effect size can be expected. This is because the direction of causality and the  
9  
10 475 number of lagged influences in the system under investigation are usually unknown and  
11  
12 476 bidirectional and feedback effects can be present as well [97]. However, as previous work from  
13  
14 477 our group [101, 104, 105] and work of others [106] suggests, 60-90 measurements suffice to  
15  
16 478 reliably identify reciprocal associations between multiple variables.  
17  
18  
19

20 479

21  
22 480 Between-person analyses: associating symptom networks to clinical stage  
23

24 481 In the between-person analyses, the data have a multilevel structure. Therefore, the unilevel  
25  
26 482 equivalent of the multilevel sample size [107] was taken to calculate the power, assuming a  
27  
28 483 conservative intraclass-correlation of 0.8. Assuming differences of 0.05 in mean coefficients (s.d.  
29  
30 484 = 0.07) between the different groups [108], the proposed study has a power of 0.8 (to detect  
31  
32 485 significant differences at  $p < 0.05$ ). Subgroups of  $N=25$  are large enough to take into account  
33  
34 486 effects of several covariates [109].  
35  
36  
37  
38

39 487

#### 40 41 488 **Ethics and dissemination** 42

43 489 This study has been approved by the medical ethical committee of the University Medical Centre  
44  
45 490 Groningen (UMCG), Groningen, The Netherlands (registration number MEC no. 2015/159,  
46  
47 491 ABR no. NL52974.042.15). The study will be conducted in accordance with the Helsinki  
48  
49 492 Declaration, meaning that participation is voluntary and written informed consent will be  
50  
51  
52 493 obtained.  
53  
54

55 494  
56  
57  
58  
59  
60

1  
2  
3 495 An online outcome monitoring system, called RoQua ([www.roqua.nl](http://www.roqua.nl)) is used for data collection  
4  
5  
6 496 and data storage, to which only designated researchers have access via the use of passwords  
7  
8 497 combined with google authentication. Participants have access to the questionnaires via a link in  
9  
10 498 their e-mail inbox. The safety of this system is guaranteed by the UMCG (an ‘In Control  
11  
12 499 Statement’ is available on request). Data management is also organized according to UMCG  
13  
14 500 standards, including a strict separation of identifying patient data (name, date of birth etc.) and  
15  
16 501 the anonymous datasets available for the researchers.  
17  
18  
19  
20 502

21  
22 503 Data gathering was not completed when this manuscript was submitted. After the publication of  
23  
24 504 this study’s main results, the data obtained by this study will become available on reasonable  
25  
26 505 request. Requests should be sent to [j.t.w.wigman@umcg.nl](mailto:j.t.w.wigman@umcg.nl) with the topic name MIRORR data.  
27  
28 506 The results of the study will be published in (inter)national peer-reviewed journals, presented at  
29  
30 507 research, clinical and general public conferences.  
31  
32  
33

## 34 508

### 35 509 **Conclusion**

36  
37  
38 510 Conceptualization of psychopathology in terms of (i) clinical staging (at macro level) and (ii)  
39  
40 511 dynamic, individual symptom networks (at a more micro level), which is the purpose of this  
41  
42 512 study, represents a promising avenue to tackle both scientific and clinical problems. Improving  
43  
44 513 our understanding of the factors driving the development of psychopathology by investigating  
45  
46 514 how symptoms influence each other will enhance our ability to identify valid phenotypes to  
47  
48 515 predict onset of (psychotic) mental disorders and to link with other relevant information (e.g.,  
49  
50 516 genetic or endophenotypic variation). In addition, a better understanding of why psychotic  
51  
52 517 symptoms can lead to a need for care in some, but resolve spontaneously in others, will help  
53  
54  
55  
56  
57  
58  
59  
60

1  
2  
3 518 mental health professionals to adequately recognize the early needs of individuals who are likely  
4  
5 519 to develop mental illness or functional impairments.  
6  
7

8 520

9  
10 521 **Acknowledgements**

11  
12 522 We would like to thank the ROQUA team for their collaboration and for building and  
13  
14 523 maintaining the smartphone web-based (diary) questionnaires. We are grateful to Laura  
15  
16 524 Steenhuis, Roos Willemsen, Marike Fowler, Cornelia Glasbergen, Marijke Muller, Eliese van  
17  
18 525 Deelen, Marion van Dijk, Sieberen Veenstra, Marietta Khachatryan and Thirza Osinga for their  
19  
20 526 contributions to the field work and data management. We thank Ernst Wit and Elske Bos for  
21  
22 527 their conceptual and methodological input. Finally, we thank Rob Wanders and Ando Emerencia  
23  
24 528 for their help with automating the personalized feedback procedure.  
25  
26  
27  
28

29 529

30  
31  
32  
33 530 **References**

- 34  
35 531 1 van Os J, Kapur S. Schizophrenia, *The Lancet* 2009;374:635-45.  
36  
37 532 2 Eaton WW, Martins SS, Nestadt G, et al. The burden of mental disorders, *Epidemiol Rev*  
38 533 2008;30:1-14.  
39  
40  
41 534 3 McCrone PR, Dhanasiri S, Patel A, et al. Paying the price: the cost of mental health care in  
42 535 England to 2026: King's Fund 2008.  
43  
44  
45 536 4 Nationaal Kompas Volksgezondheid. Psychisch functioneren: Zijn er verschillen tussen  
46 537 Nederland en andere landen? Preventie gericht op psychisch functioneren van jeugd. .  
47  
48  
49 538 5 Van Os J, Linscott RJ, Myin-Germeys I, et al. A systematic review and meta-analysis of the  
50 539 psychosis continuum: evidence for a psychosis proneness–persistence–impairment model of  
51 540 psychotic disorder, *Psychol Med* 2009;39:179-95.  
52  
53 541 6 Wigman J, van Nierop M, Vollebergh WA, et al. Evidence that psychotic symptoms are  
54 542 prevalent in disorders of anxiety and depression, impacting on illness onset, risk, and severity--  
55 543 implications for diagnosis and ultra-high risk research, *Schizophr Bull* 2012;38:247-57.  
56  
57  
58  
59  
60

- 1  
2  
3 544 7 Wigman J, van Os J, Abidi L, et al. Subclinical psychotic experiences and bipolar spectrum  
4 545 features in depression: association with outcome of psychotherapy, *Psychol Med* 2014;44:325-  
5 546 36.
- 7  
8 547 8 Kendell R, Jablensky A. Distinguishing between the validity and utility of psychiatric  
9 548 diagnoses, *Am J Psychiatry* 2003.
- 11  
12 549 9 Widiger TA. A dimensional model of psychopathology, *Psychopathology* 2005;38:211-4.
- 14  
15 550 10 Widiger TA, Samuel DB. Diagnostic categories or dimensions? A question for the Diagnostic  
16 551 and statistical manual of mental disorders--, *J Abnorm Psychol* 2005;114:494.
- 17  
18 552 11 Kendler KS, Zachar P, Craver C. What kinds of things are psychiatric disorders? *Psychol Med*  
19 553 2011;41:1143-50.
- 21  
22 554 12 Kupfer DJ, First MB, Regier DA. A research agenda for DSM V: American Psychiatric Pub  
23 555 2008.
- 25  
26 556 13 Hickie IB, Scott J, McGorry PD. Clinical staging for mental disorders: a new development in  
27 557 diagnostic practice in mental health, *Med J Aust* 2013;198:461-2.
- 28  
29 558 14 Strauss JS. Hallucinations and delusions as points on continua function: Rating scale  
30 559 evidence, *Arch Gen Psychiatry* 1969;21:581-6.
- 32  
33 560 15 Haslam N, Holland E, Kuppens P. Categories versus dimensions in personality and  
34 561 psychopathology: a quantitative review of taxometric research, *Psychol Med* 2012;42:903-20.
- 35  
36 562 16 Kendler KS, Gardner Jr CO. Boundaries of major depression: an evaluation of DSM-IV  
37 563 criteria, *Am J Psychiatry* 1998.
- 39  
40 564 17 Angst J, Gamma A, Benazzi F, et al. Toward a re-definition of subthreshold bipolarity:  
41 565 epidemiology and proposed criteria for bipolar-II, minor bipolar disorders and hypomania, *J*  
42 566 *Affect Disord* 2003;73:133-46.
- 44  
45 567 18 Carter RM, Wittchen H, Pfister H, et al. One - year prevalence of subthreshold and threshold  
46 568 DSM - IV generalized anxiety disorder in a nationally representative sample, *Depress Anxiety*  
47 569 2001;13:78-88.
- 49  
50 570 19 Krueger RF, Piasecki TM. Toward a dimensional and psychometrically-informed approach to  
51 571 conceptualizing psychopathology, *Behav Res Ther* 2002;40:485-99.
- 52  
53 572 20 Paus T, Keshavan M, Giedd JN. Why do many psychiatric disorders emerge during  
54 573 adolescence? *Nature Reviews Neuroscience* 2008;9:947-57.
- 55  
56  
57  
58  
59  
60

- 1  
2  
3 574 21 Kessler RC, Berglund P, Demler O, et al. Lifetime prevalence and age-of-onset distributions  
4 575 of DSM-IV disorders in the National Comorbidity Survey Replication, *Arch Gen Psychiatry*  
5 576 2005;62:593-602.
- 7  
8 577 22 McGorry PD, Hickie IB, Yung AR, et al. Clinical staging of psychiatric disorders: a heuristic  
9 578 framework for choosing earlier, safer and more effective interventions, *Aust N Z J Psychiatry*  
10 579 2006;40:616-22.
- 12  
13 580 23 McGorry PD. Issues for DSM-V: clinical staging: a heuristic pathway to valid nosology and  
14 581 safer, more effective treatment in psychiatry, *Am J Psychiatry* 2007.
- 16  
17 582 24 Wigman JT, van Os J, Thiery E, et al. Psychiatric diagnosis revisited: towards a system of  
18 583 staging and profiling combining nomothetic and idiographic parameters of momentary mental  
19 584 states, *PLoS One* 2013;8:e59559.
- 21  
22 585 25 McGorry P, van Os J. Redeeming diagnosis in psychiatry: timing versus specificity, *Lancet*  
23 586 2013;381:343-5.
- 25  
26 587 26 Hyman SE. The diagnosis of mental disorders: the problem of reification, *Annual review of*  
27 588 *clinical psychology* 2010;6:155-79.
- 28  
29 589 27 McGorry P, Keshavan M, Goldstone S, et al. Biomarkers and clinical staging in psychiatry,  
30 590 *World Psychiatry* 2014;13:211-23.
- 32  
33 591 28 McGorry PD, Killackey E, Yung AR. Early intervention in psychotic disorders: detection and  
34 592 treatment of the first episode and the critical early stages, *Med J Aust* 2007;187:S8-10.
- 35  
36 593 29 Scott J, Leboyer M, Hickie I, et al. Clinical staging in psychiatry: a cross-cutting model of  
37 594 diagnosis with heuristic and practical value, *Br J Psychiatry* 2013;202:243-5.
- 39  
40 595 30 Keshavan MS, DeLisi LE, Seidman LJ. Early and broadly defined psychosis risk mental  
41 596 states, *Schizophr Res* 2011;126:1-10.
- 42  
43 597 31 Fusar-Poli P, Yung A, McGorry P, et al. Lessons learned from the psychosis high-risk state:  
44 598 towards a general staging model of prodromal intervention, *Psychol Med* 2014;44:17-24.
- 46  
47 599 32 Tandon R, Nasrallah HA, Keshavan MS. Schizophrenia, "just the facts" 4. Clinical features  
48 600 and conceptualization, *Schizophr Res* 2009;110:1-23.
- 49  
50 601 33 Fusar-Poli P, Bonoldi I, Yung AR, et al. Predicting psychosis: meta-analysis of transition  
51 602 outcomes in individuals at high clinical risk, *Arch Gen Psychiatry* 2012;69:220-9.
- 53  
54 603 34 Lin A, Nelson B, Yung A. 'At-risk' for psychosis research: where are we heading?  
55 604 *Epidemiology and psychiatric sciences* 2012;21:329-34.

- 1  
2  
3 605 35 van Os J. The dynamics of subthreshold psychopathology: implications for diagnosis and  
4 606 treatment, *Am J Psychiatry* 2013.
- 607 36 Kaymaz N, Drukker M, Lieb R, et al. Do subthreshold psychotic experiences predict clinical  
608 outcomes in unselected non-help-seeking population-based samples? A systematic review and  
609 meta-analysis, enriched with new results, *Psychol Med* 2012;42:2239-53.
- 610 37 Velthorst E, Nieman D, Klaassen R, et al. Three - year course of clinical symptomatology in  
611 young people at ultra high risk for transition to psychosis, *Acta Psychiatr Scand* 2011;123:36-42.
- 612 38 Zammit S, Kounali D, Cannon M, et al. Psychotic experiences and psychotic disorders at age  
613 18 in relation to psychotic experiences at age 12 in a longitudinal population-based cohort study,  
614 *Am J Psychiatry* 2013.
- 615 39 Kelleher I, Keeley H, Corcoran P, et al. Clinicopathological significance of psychotic  
616 experiences in non-psychotic young people: evidence from four population-based studies, *Br J*  
617 *Psychiatry* 2012;201:26-32.
- 618 40 van Rossum I, Dominguez MD, Lieb R, et al. Affective dysregulation and reality distortion: a  
619 10-year prospective study of their association and clinical relevance, *Schizophr Bull*  
620 2011;37:561-71.
- 621 41 Wigman J, Lin A, Vollebergh W, et al. Subclinical psychosis and depression: co-occurring  
622 phenomena that do not predict each other over time, *Schizophr Res* 2011;130:277-81.
- 623 42 Werbeloff N, Drukker M, Dohrenwend BP, et al. Self-reported attenuated psychotic  
624 symptoms as forerunners of severe mental disorders later in life, *Arch Gen Psychiatry*  
625 2012;69:467-75.
- 626 43 Addington J, Cornblatt BA, Cadenhead KS, et al. At clinical high risk for psychosis: outcome  
627 for nonconverters, *Am J Psychiatry* 2011;168:800-5.
- 628 44 Yung AR, Phillips LJ, Yuen HP, et al. Psychosis prediction: 12-month follow up of a high-  
629 risk ("prodromal") group, *Schizophr Res* 2003;60:21-32.
- 630 45 Yung AR, Phillips LJ, Yuen HP, et al. Risk factors for psychosis in an ultra high-risk group:  
631 psychopathology and clinical features, *Schizophr Res* 2004;67:131-42.
- 632 46 Demjaha A, Valmaggia L, Stahl D, et al. Disorganization/cognitive and negative symptom  
633 dimensions in the at-risk mental state predict subsequent transition to psychosis, *Schizophr Bull*  
634 2012;38:351-9.
- 635 47 Kessler RC, Birnbaum H, Demler O, et al. The prevalence and correlates of nonaffective  
636 psychosis in the National Comorbidity Survey Replication (NCS-R), *Biol Psychiatry*  
637 2005;58:668-76.



- 1  
2  
3 638 48 Breetvelt EJ, Boks MP, Numans ME, et al. Schizophrenia risk factors constitute general risk  
4 639 factors for psychiatric symptoms in the population, *Schizophr Res* 2010;120:184-90.  
5  
6  
7 640 49 Weiser M, van Os J, Davidson M. Time for a shift in focus in schizophrenia: from narrow  
8 641 phenotypes to broad endophenotypes, *Br J Psychiatry* 2005;187:203-5.  
9  
10 642 50 Craddock N, O'Donovan MC, Owen MJ. Psychosis genetics: modeling the relationship  
11 643 between schizophrenia, bipolar disorder, and mixed (or "schizoaffective") psychoses, *Schizophr*  
12 644 *Bull* 2009;35:482-90.  
13  
14  
15 645 51 Hill SK, Reilly JL, Harris MS, et al. A comparison of neuropsychological dysfunction in first-  
16 646 episode psychosis patients with unipolar depression, bipolar disorder, and schizophrenia,  
17 647 *Schizophr Res* 2009;113:167-75.  
18  
19  
20 648 52 Bystritsky A, Nierenberg A, Feusner J, et al. Computational non-linear dynamical psychiatry:  
21 649 a new methodological paradigm for diagnosis and course of illness, *J Psychiatr Res*  
22 650 2012;46:428-35.  
23  
24  
25 651 53 Strobl EV, Eack SM, Swaminathan V, et al. Predicting the risk of psychosis onset: advances  
26 652 and prospects, *Early intervention in psychiatry* 2012;6:368-79.  
27  
28 653 54 Fusar-Poli P, Borgwardt S, Bechdolf A, et al. The psychosis high-risk state: a comprehensive  
29 654 state-of-the-art review, *JAMA psychiatry* 2013;70:107-20.  
30  
31  
32 655 55 Barnaby N, McGorry PD, Wichers M, et al. Moving from static to dynamic models of the  
33 656 onset of mental disorder, In press.  
34  
35 657 56 Nelson B, McGorry PD, Wichers M, et al. Moving From Static to Dynamic Models of the  
36 658 Onset of Mental Disorder: A Review, *Jama psychiatry* 2017;74:528-34.  
37  
38  
39 659 57 Guloksuz S, Pries L, van Os J. Application of network methods for understanding mental  
40 660 disorders: pitfalls and promise, *Psychol Med* 2017:1-10.  
41  
42  
43 661 58 Borsboom D, Cramer AO. Network analysis: an integrative approach to the structure of  
44 662 psychopathology, *Annual review of clinical psychology* 2013;9:91-121.  
45  
46 663 59 Borsboom D, Cramer AO, Schmittmann VD, et al. The small world of psychopathology, *PloS*  
47 664 *one* 2011;6:e27407.  
48  
49  
50 665 60 van Os J, Kenis G, Rutten BP. The environment and schizophrenia, *Nature* 2010;468:203-12.  
51  
52 666 61 Wigman J, Kelleher I, Devlin N, et al. Coping as a moderating factor between psychotic  
53 667 symptoms and functioning in adolescents with mental illness. 2013;22:S108-9.  
54  
55 668 62 Roe D, Yanos PT, Lysaker PH. Coping with psychosis: an integrative developmental  
56 669 framework, *J Nerv Ment Dis* 2006;194:917-24.  
57  
58  
59  
60

- 1  
2  
3 670 63 Yanos P, Moos R. Determinants of functioning and well-being among individuals with  
4 671 schizophrenia: an integrated model, *Clin Psychol Rev* 2007;27:58-77.
- 6  
7 672 64 Barabási A, Frangos J. *Linked: the new science of networks* science of networks: Basic  
8 673 Books 2014.
- 10  
11 674 65 Barabási A. *Bursts: the hidden patterns behind everything we do, from your e-mail to bloody*  
12 675 *crusades*: Penguin 2010.
- 14  
15 676 66 Schmittmann VD, Cramer AO, Waldorp LJ, et al. Deconstructing the construct: A network  
16 677 perspective on psychological phenomena, *New Ideas Psychol* 2013;31:43-53.
- 18  
19 678 67 Yung AR, Nelson B, Thompson A, et al. The psychosis threshold in Ultra High Risk  
20 679 (prodromal) research: is it valid? *Schizophr Res* 2010;120:1-6.
- 22  
23 680 68 Oorschot M, Lataster T, Thewissen V, et al. Symptomatic remission in psychosis and real-life  
24 681 functioning, *Br J Psychiatry* 2012;201:215-20.
- 26  
27 682 69 Verma S, Subramaniam M, Abdin E, et al. Symptomatic and functional remission in patients  
28 683 with first - episode psychosis, *Acta Psychiatr Scand* 2012;126:282-9.
- 30  
31 684 70 Wunderink L, Nieboer RM, Wiersma D, et al. Recovery in remitted first-episode psychosis at  
32 685 7 years of follow-up of an early dose reduction/discontinuation or maintenance treatment  
33 686 strategy: long-term follow-up of a 2-year randomized clinical trial, *JAMA psychiatry*  
34 687 2013;70:913-20.
- 36  
37 688 71 Konings M, Bak M, Hanssen M, et al. Validity and reliability of the CAPE: a self - report  
38 689 instrument for the measurement of psychotic experiences in the general population, *Acta*  
39 690 *Psychiatr Scand* 2006;114:55-61.
- 41  
42 691 72 Ising HK, Velting W, Loewy RL, et al. The validity of the 16-item version of the Prodromal  
43 692 Questionnaire (PQ-16) to screen for ultra high risk of developing psychosis in the general help-  
44 693 seeking population, *Schizophr Bull* 2012;38:1288-96.
- 46  
47 694 73 Yung AR, Yung AR, Pan Yuen H, et al. Mapping the onset of psychosis: the comprehensive  
48 695 assessment of at-risk mental states, *Aust N Z J Psychiatry* 2005;39:964-71.
- 50  
51 696 74 Wigman JT, Vollebergh WA, Raaijmakers QA, et al. The structure of the extended psychosis  
52 697 phenotype in early adolescence--a cross-sample replication, *Schizophr Bull* 2011;37:850-60.
- 54  
55 698 75 Oorschot M, Kwapil T, Delespaul P, et al. Momentary assessment research in psychosis.  
56 699 *Psychol Assess* 2009;21:498.
- 58  
59 700 76 Myin-Germeys I, Marcelis M, Krabbendam L, et al. Subtle fluctuations in psychotic  
60 701 phenomena as functional states of abnormal dopamine reactivity in individuals at risk, *Biol*  
702 *Psychiatry* 2005;58:105-10.



- 1  
2  
3 703 77 Wigman JT, Collip D, Wichers M, et al. Altered transfer of momentary mental states  
4 704 (ATOMS) as the basic unit of psychosis liability in interaction with environment and emotions,  
5 705 *PLoS One* 2013;8:e54653.
- 7  
8 706 78 Kroenke K, Spitzer RL, Williams JB. The Phq - 9, *Journal of general internal medicine*  
9 707 2001;16:606-13.
- 11  
12 708 79 Zigmond AS, Snaith RP. The hospital anxiety and depression scale, *Acta Psychiatr Scand*  
13 709 1983;67:361-70.
- 15  
16 710 80 American Psychiatric Association. Diagnostic and statistical manual of mental disorders  
17 711 (DSM-5®): American Psychiatric Pub 2013.
- 19  
20 712 81 Yik M, Russell JA, Steiger JH. A 12-point circumplex structure of core affect. *Emotion*  
21 713 2011;11:705.
- 23  
24 714 82 Feldman Barrett L, Russell JA. Independence and bipolarity in the structure of current affect.  
25 715 *J Pers Soc Psychol* 1998;74:967.
- 27  
28 716 83 Derogatis LR, Unger R. Symptom checklist - 90 - revised, *Corsini encyclopedia of*  
29 717 *psychology* 2010.
- 31  
32 718 84 Nienhuis FJ, van de Willige G, Rijnders CA, et al. Validity of a short clinical interview for  
33 719 psychiatric diagnosis: the mini-SCAN, *Br J Psychiatry* 2010;196:64-8.
- 35  
36 720 85 De Jong A, Lubbe PM. Groningse vragenlijst over sociaal gedrag:  
37 721 zelfbeoordelingsvragenlijsten voor het vaststellen van problemen in het interpersoonlijke  
38 722 functioneren: handleiding: Rob Giel Onderzoekcentrum 2001.
- 40  
41 723 86 Diener E, Wirtz D, Tov W, et al. New well-being measures: Short scales to assess flourishing  
42 724 and positive and negative feelings, *Soc Indicators Res* 2010;97:143-56.
- 44  
45 725 87 Lovibond PF, Lovibond SH. The structure of negative emotional states: Comparison of the  
46 726 Depression Anxiety Stress Scales (DASS) with the Beck Depression and Anxiety Inventories,  
47 727 *Behav Res Ther* 1995;33:335-43.
- 49  
50 728 88 Altman EG, Hedeker D, Peterson JL, et al. The Altman self-rating mania scale, *Biol*  
51 729 *Psychiatry* 1997;42:948-55.
- 53  
54 730 89 van Sonderen E. Sociale Steun Lijst-Interacties (SSL-I) en Sociale Steun Lijst-Discrepanties  
55 731 (SSL-D): Noorderlijk Centrum voor Gezondheidsvraagstukken, Groningen 1993.
- 57  
58 732 90 Smith BW, Dalen J, Wiggins K, et al. The brief resilience scale: assessing the ability to  
59 733 bounce back, *Int J Behav Med* 2008;15:194-200.
- 60

- 1  
2  
3 734 91 Schreurs P, Van de Willige G. Omgaan met problemen en gebeurtenissen. De Utrechtse  
4 735 Coping Lijst (UCL)(Coping with problems and events. The Utrecht Coping List (UCL)), 1998.  
5  
6  
7 736 92 Roenneberg T, Kuehnle T, Juda M, et al. Epidemiology of the human circadian clock, *Sleep*  
8 737 *Medicine Reviews* 2007;11:429-38.  
9  
10 738 93 Rosmalen J, Bos E, De Jonge P. Validation of the Long-term Difficulties Inventory (LDI) and  
11 739 the List of Threatening Experiences (LTE) as measures of stress in epidemiological population-  
12 740 based cohort studies, *Psychol Med* 2012;42:2599-608.  
13  
14  
15 741 94 Stone VE, Baron-Cohen S, Knight RT. Frontal lobe contributions to theory of mind, *J Cogn*  
16 742 *Neurosci* 1998;10:640-56.  
17  
18  
19 743 95 Armsden GC, Greenberg MT. The inventory of parent and peer attachment: Individual  
20 744 differences and their relationship to psychological well-being in adolescence, *Journal of youth*  
21 745 *and adolescence* 1987;16:427-54.  
22  
23  
24 746 96 Deković M, Noom MJ, Meeus W. Expectations regarding development during adolescence:  
25 747 Parental and adolescent perceptions, *Journal of youth and adolescence* 1997;26:253-72.  
26  
27 748 97 Brandt PT. Multiple time series models: Sage 2007.  
28  
29  
30 749 98 Opsahl T, Agneessens F, Skvoretz J. Node centrality in weighted networks: Generalizing  
31 750 degree and shortest paths, *Social networks* 2010;32:245-51.  
32  
33 751 99 Epskamp S, Cramer A, Waldorp L, et al. Qgraph: network representations of relationships in  
34 752 data, *R package version 0.4* 2011;10.  
35  
36  
37 753 100 Wit E, Abbruzzo A. Factorial graphical lasso for dynamic networks, *arXiv preprint*  
38 754 *arXiv:1205.2911* 2012.  
39  
40 755 101 van Gils A, Burton C, Bos EH, et al. Individual variation in temporal relationships between  
41 756 stress and functional somatic symptoms, *J Psychosom Res* 2014;77:34-9.  
42  
43  
44 757 102 Bouwmans ME, Bos EH, Booij SH, et al. Intra-and inter-individual variability of  
45 758 longitudinal daytime melatonin secretion patterns in depressed and non-depressed individuals,  
46 759 *Chronobiol Int* 2015;32:441-6.  
47  
48  
49 760 103 Honaker J, King G, Blackwell M. Amelia II: A program for missing data, *Journal of*  
50 761 *statistical software* 2011;45:Retrieved from <http://www.jstatsoft.org/v45/i07>.  
51  
52 762 104 Rosmalen JG, Wenting AM, Roest AM, et al. Revealing causal heterogeneity using time  
53 763 series analysis of ambulatory assessments: application to the association between depression and  
54 764 physical activity after myocardial infarction, *Psychosom Med* 2012;74:377-86.  
55  
56  
57  
58  
59  
60

- 1  
2  
3 765 105 Bos EH, Hoenders R, de Jonge P. Wind direction and mental health: a time-series analysis  
4 766 of weather influences in a patient with anxiety disorder, *BMJ Case Rep*  
5 767 2012;2012:10.1136/bcr.2012-006300.
- 7  
8 768 106 Lütkepohl H. New introduction to multiple time series analysis, 2005.
- 9  
10 769 107 Snijders TB, Bosker R. R.(1999). Multilevel analysis: An introduction to basic and advanced  
11 770 multilevel modeling, .
- 13  
14 771 108 Wigman JT, van Os J, Thiery E, et al. Psychiatric diagnosis revisited: towards a system of  
15 772 staging and profiling combining nomothetic and idiographic parameters of momentary mental  
16 773 states, *PLoS One* 2013;8:e59559.
- 18  
19 774 109 Hsu LM. Random sampling, randomization, and equivalence of contrasted groups in  
20 775 psychotherapy outcome research. *J Consult Clin Psychol* 1989;57:131.

21  
22 776

### 23 777 **Authors' contributions**

24  
25  
26 778 JTWW conceived the study. JTWW and SHB designed and are executing the study and drafted  
27  
28  
29 779 the first versions of the manuscript. LW, PdJ, JvO, MCW helped conceptualize the study and  
30  
31 780 provided overall supervision, SS contributed to the study design, specifically to the data  
32  
33 781 gathering and data management part. All authors critically reviewed the manuscript, and  
34  
35 782 collaborated in the discussion of the intellectual content of the manuscript. All authors read and  
36  
37 783 approved the final manuscript.

38  
39 784

### 40 785 **Funding**

41  
42  
43 786 This work was supported by the Netherlands Organization for Scientific Research (NWO) (Veni  
44  
45 787 Dr. J.T.W. Wigman: no. 016.156.019). In addition, M. Wichers was supported by an H2020  
46  
47 788 European Research Council Consolidator Grant (ERC-CoG-2015, project 681466 – TRANS-ID).  
48  
49 789 The funders had no role in the study design, data collection and analysis, decision to publish, or  
50  
51 790 the preparation of the manuscript.

52  
53 791

1  
2  
3 792 **Competing interests**  
4

5  
6 793 The authors declare that they have no competing interests.  
7

8 794  
9

10 795  
11  
12  
13  
14  
15  
16  
17  
18  
19  
20  
21  
22  
23  
24  
25  
26  
27  
28  
29  
30  
31  
32  
33  
34  
35  
36  
37  
38  
39  
40  
41  
42  
43  
44  
45  
46  
47  
48  
49  
50  
51  
52  
53  
54  
55  
56  
57  
58  
59  
60

For peer review only

1  
2  
3  
4  
5  
6  
7  
8  
9  
10  
11  
12  
13  
14  
15  
16  
17  
18  
19  
20  
21  
22  
23  
24  
25  
26  
27  
28  
29  
30  
31  
32  
33  
34  
35  
36  
37  
38  
39  
40  
41  
42  
43  
44  
45  
46  
47  
48  
49  
50  
51  
52  
53  
54  
55  
56  
57  
58  
59  
60

796 **Tables**

For peer review only

797 Table 1. Overview of instruments.

| Domain                 | Instrument       | Method | Purpose            | Time (min) | Screening | Diary pre (baseline) | Diary post | Follow-up 1     | Diary pre      | Diary post | Follow-up 2     | Follow-up 3     |
|------------------------|------------------|--------|--------------------|------------|-----------|----------------------|------------|-----------------|----------------|------------|-----------------|-----------------|
|                        |                  |        |                    |            | T0        | T0                   | T0         | T1              | T1             | T1         | T2              | T3              |
|                        |                  |        |                    |            |           |                      | (3m)       |                 |                | (3m)       |                 |                 |
| <i>Demo-graphics</i>   | Gen. Health      | SR     | Demogr, conf.      | 5          | X         |                      |            |                 | X <sup>†</sup> |            |                 |                 |
|                        | Vignette         | INT    | History psychosis  | 5          | X**       |                      |            |                 |                |            |                 |                 |
| <i>Psychosis</i>       | CAPE             | SR     | Psychotic Sx       | 6          | X         |                      | X          | X               |                | X          | X               | X               |
|                        | PQ               | SR     | Clinical stage     | 3          |           | X <sup>†</sup>       |            | X <sup>†</sup>  |                |            | X <sup>†</sup>  | X <sup>†</sup>  |
|                        | CAARMS           | INT    | Clinical stage     | 30-90      |           | X* <sup>†</sup>      |            | X* <sup>†</sup> |                |            | X* <sup>†</sup> | X* <sup>†</sup> |
| <i>Psychopathology</i> | Mini-SCAN        | INT    | Diagnosis          | 30         |           | X                    |            | X               |                |            | X               | X               |
|                        | SCL-90           | SR     | Severity           | 20         |           | X                    |            | X               |                |            | X               | X               |
|                        | PsychCaseReg     | REG    | Care use           | -          |           | X                    |            | X               |                |            | X               | X               |
|                        | Care use - extra | SR     | Care use           | 1          |           | X                    |            | X               |                |            | X               | X               |
|                        | DASS             | SR     | Depress Anxiety Sx | 3          |           | X                    | X          |                 | X              | X          |                 |                 |
|                        | ASRM             | SR     | Mania Sx           | 3          |           | X                    | X          |                 | X              | X          |                 |                 |

1  
2  
3  
4  
5  
6  
7  
8  
9  
10  
11  
12  
13  
14  
15  
16  
17  
18  
19  
20  
21  
22  
23  
24  
25  
26  
27  
28  
29  
30  
31  
32  
33  
34  
35  
36  
37  
38  
39  
40  
41  
42  
43  
44  
45  
46  
47  
48  
49

Table 1. Continued.

| Domain                       | Instrument     | Method | Purpose             | Time (min) | Screening | Diary pre (baseline) | Diary post | Follow-up 1 | Diary pre | Diary post | Follow-up 2 | Follow-up 3 |
|------------------------------|----------------|--------|---------------------|------------|-----------|----------------------|------------|-------------|-----------|------------|-------------|-------------|
| <i>Social functioning</i>    | GVSG-45        | SR     | Social functioning  | 8          |           | X                    |            | X           |           |            | X           | X           |
|                              | Flourishing Sc | SR     | Well-being          | 1          |           | X                    |            | X           |           |            | X           | X           |
| <i>Risk &amp; resilience</i> | SSL            | SR     | Social support      | 7          |           | X                    | X          |             | X         | X          |             |             |
|                              | IPPA           | SR     | Bonding             | 9          |           | X <sup>#</sup>       |            |             |           |            |             |             |
|                              | BRS            | SR     | Resilience          | 2          |           | X                    | X          |             | X         | X          |             |             |
|                              | UCL            | SR     | Coping              | 5          |           | X                    | X          |             | X         | X          |             |             |
|                              | Brugha LTE     | SR     | Life events, trauma | 4          |           | X                    |            |             |           | X          |             |             |
|                              | MCTQ           | SR     | Sleep               | 3          |           | X                    |            |             |           | X          |             |             |
|                              | Faux-Pas Task  | INT    | Social Cognition    | 5          |           | X <sup>#</sup>       |            |             |           |            |             |             |
|                              | Actical®       | SENS   | Physical activity   | -          |           |                      |            |             |           | X***       |             |             |

798 Note. SR = Self-report, INT = Interview, REG = register, SENS = sensor Sx = symptoms, demogr = demographics, conf =  
799 confounders, depress = depression, T = measurement wave, m = months.

1  
2  
3 800 \* Only administered when PQ score is 6 or higher.  
4  
5

6 801 \*\* Only administered when there is a history of a psychiatric disorder according to the information on the General Health  
7  
8

9 802 Questionnaire  
10

11  
12 803 \*\*\* Offered to participants as optional.  
13  
14

15 804 † Available as ROM data for all individuals in clinical care for mental health at each measurement wave.  
16  
17

18 805 ‡ Send out several weeks before the daily diary period to screen on exclusion criteria  
19  
20

21  
22 806 # Administered only to subgroup 4  
23  
24

25 807  
26  
27  
28  
29  
30  
31  
32  
33  
34  
35  
36  
37  
38  
39  
40  
41  
42  
43  
44  
45  
46  
47  
48  
49



1  
2  
3 808 **Figure titles and legends**  
4  
5

6 809  
7  
8

9  
10 810 Figure 1. Parameters of symptom networks.  
11  
12

13 811  
14

15  
16 812  
17

18  
19 813 Figure 2. Flowchart.  
20  
21

22 814 Note. Light grey area within blue dashed square indicates optional measurements.  
23  
24

25  
26 815  
27

28  
29 816  
30

31  
32 817 Figure 3. Definition of subgroups.  
33  
34

35 818  
36  
37  
38  
39  
40  
41  
42  
43  
44  
45  
46  
47  
48  
49  
50  
51  
52  
53  
54  
55  
56  
57  
58  
59  
60

1  
2  
3 819 **Additional files**  
4  
5

6 820  
7  
8

9  
10 821 Additional file 1.docx  
11

12  
13 822 Title: Table S1. Diary items  
14

15  
16 823 Description: Original Dutch diary items and their translation to English  
17  
18  
19  
20  
21  
22  
23  
24  
25  
26  
27  
28  
29  
30  
31  
32  
33  
34  
35  
36  
37  
38  
39  
40  
41  
42  
43  
44  
45  
46  
47  
48  
49  
50  
51  
52  
53  
54  
55  
56  
57  
58  
59  
60

For peer review only

1  
2  
3  
4  
5  
6  
7  
8  
9  
10  
11  
12  
13  
14  
15  
16  
17  
18  
19  
20  
21  
22  
23  
24  
25  
26  
27  
28  
29  
30  
31  
32  
33  
34  
35  
36  
37  
38  
39  
40  
41  
42  
43  
44  
45  
46  
47  
48  
49  
50  
51  
52  
53  
54  
55  
56  
57  
58  
59  
60

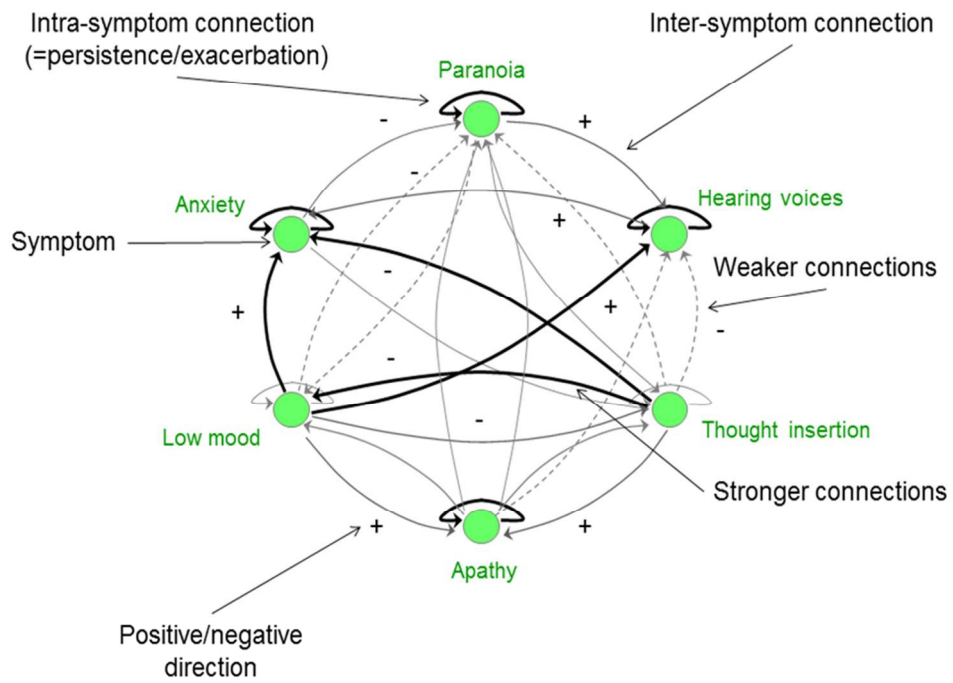

Figure 1. Parameters of symptom networks.

242x170mm (101 x 107 DPI)

ew only

1  
2  
3  
4  
5  
6  
7  
8  
9  
10  
11  
12  
13  
14  
15  
16  
17  
18  
19  
20  
21  
22  
23  
24  
25  
26  
27  
28  
29  
30  
31  
32  
33  
34  
35  
36  
37  
38  
39  
40  
41  
42  
43

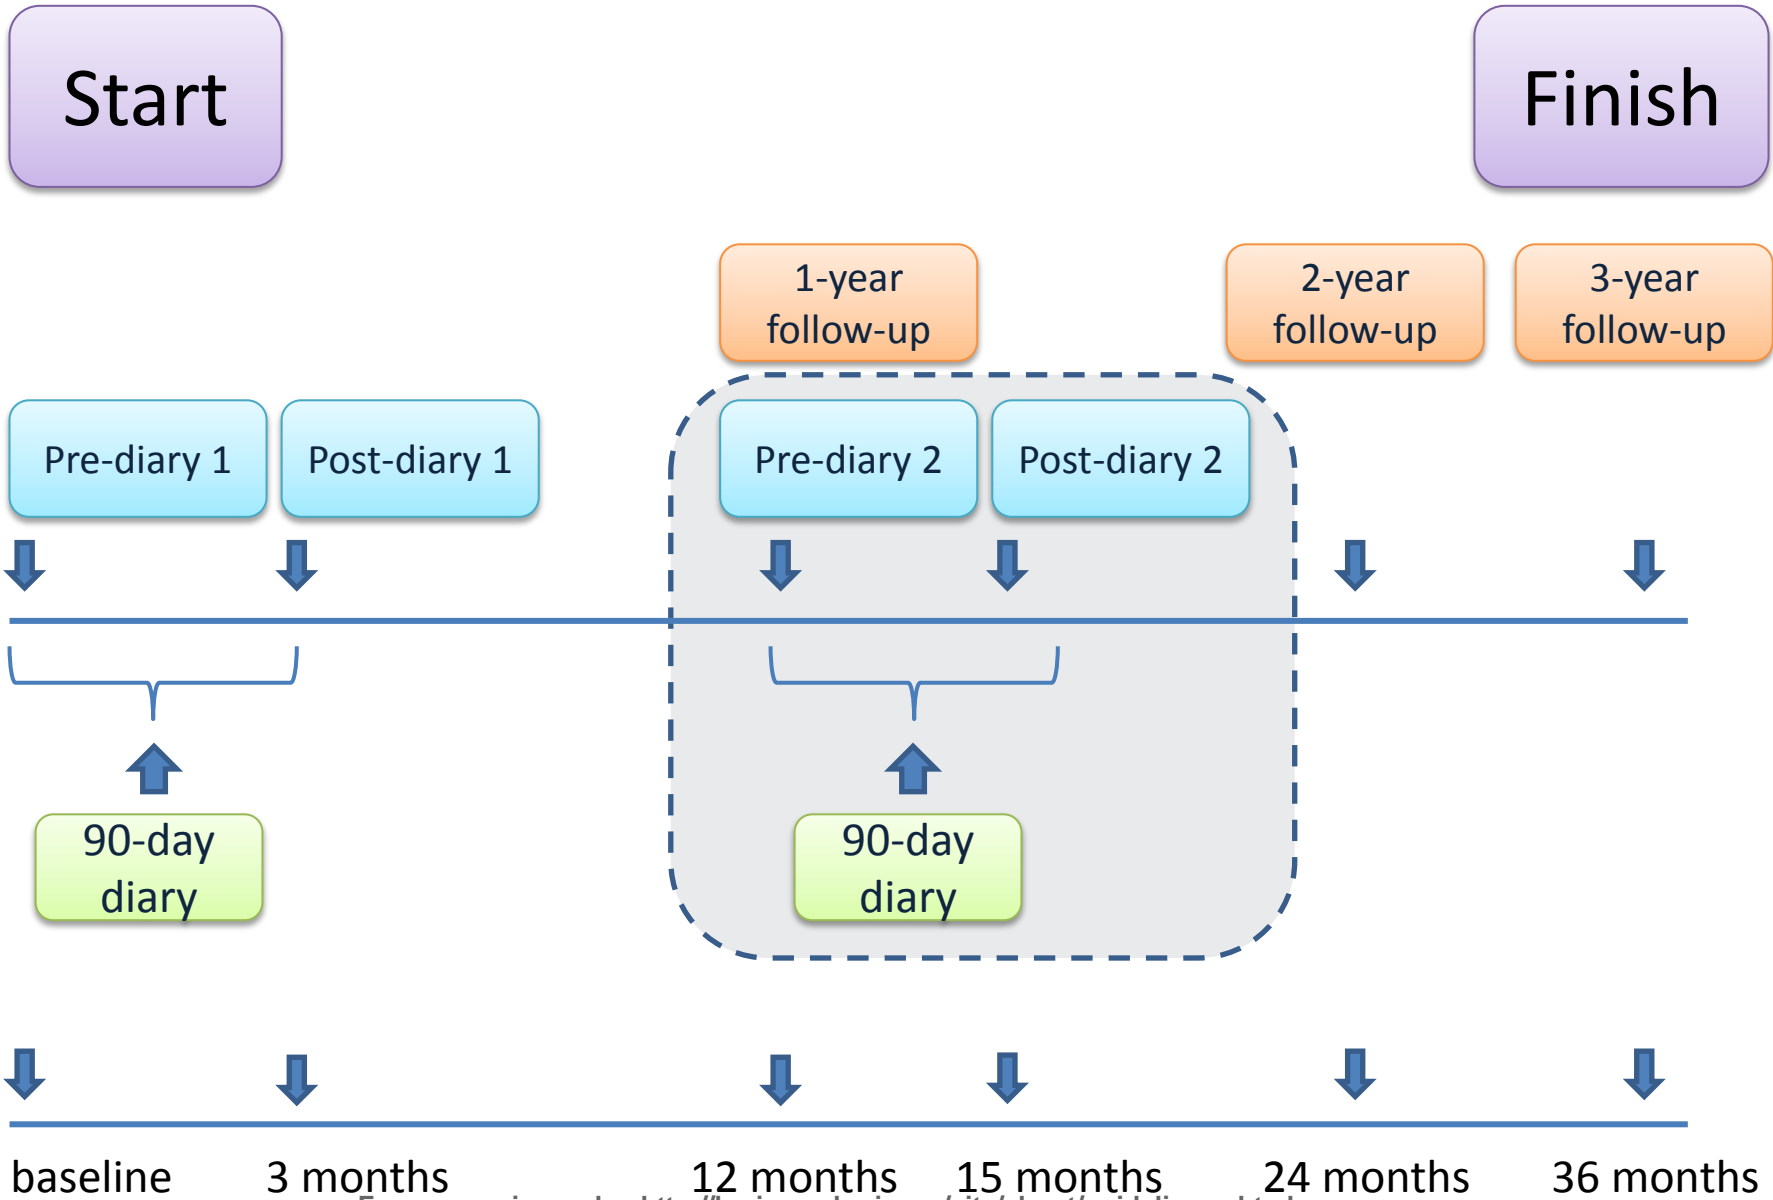

# General population

# Clinical population

1  
2  
3  
4  
5  
6  
7  
8  
9  
10  
11  
12  
13  
14  
15  
16  
17  
18  
19  
20  
21  
22  
23  
24  
25  
26  
27  
28  
29  
30  
31  
32  
33  
34  
35  
36  
37  
38  
39  
40  
41  
42  
43

N=100 from the general population (18-35 year) completed the CAPE

N=25 with highest scores invited for diary study

**Subgroup 1**

Score on PQ-16 below 6: no follow-up

**Subgroup 2**

CAARMS interview: no Ultra High Risk

**Subgroup 3**

All new patients in mental health care age 18-35 years completed the PQ-16

Score on PQ-16 of 6 or higher: follow-up with CAARMS interview

CAARMS interview: Ultra High Risk

**Subgroup 4**

Supplementary Table S1. Diary items.

| Question | Dutch                                                   | Translation                                            | Response range                                                                                      | Range   | Description      |
|----------|---------------------------------------------------------|--------------------------------------------------------|-----------------------------------------------------------------------------------------------------|---------|------------------|
| 1        | Ik voel me nu                                           | Right now, I feel                                      | Very unpleasant – Very pleasant                                                                     | 0 - 100 | Momentary affect |
| 2        | Ik voel me nu                                           | Right now, I feel                                      | Very restless / excited – Very quit/calm                                                            | 0 - 100 | Momentary affect |
| 3        | Op mijn beste moment van vandaag voelde ik mij          | During my best moment of the day, I felt               | Very unpleasant – Very pleasant                                                                     | 0 - 100 | Momentary affect |
| 4        | Op mijn beste moment van vandaag voelde ik mij          | During my best moment of the day, I felt               | Very restless / excited – Very quit/calm                                                            | 0 - 100 | Momentary affect |
| 5        | Wanneer was dit beste moment ongeveer? Ergens in de     | Around when was this best moment?<br>Somewhere in the  | <ul style="list-style-type: none"> <li>• Morning</li> <li>• Afternoon</li> <li>• Evening</li> </ul> | 1, 2, 3 | Momentary affect |
| 6        | Op mijn slechtste moment van vandaag voelde ik mij      | During my worst moment of the day, I felt              | Very unpleasant – Very pleasant                                                                     | 0 - 100 | Momentary affect |
| 7        | Op mijn slechtste moment van vandaag voelde ik mij      | During my worst moment of the day, I felt              | Very restless/ excited – Very quit/calm                                                             | 0 - 100 | Momentary affect |
| 8        | Wanneer was dit slechtste moment ongeveer? Ergens in de | Around when was this worst moment?<br>Somewhere in the | <ul style="list-style-type: none"> <li>• Morning</li> <li>• Afternoon</li> <li>• Evening</li> </ul> | 1, 2, 3 | Momentary affect |
| 9        | Heb je afgelopen nacht goed                             | Did you sleep well tonight?                            | Not at all – Very well                                                                              | 0 - 100 | Sleep            |

|    |                    |                            |                               |                        |         |              |
|----|--------------------|----------------------------|-------------------------------|------------------------|---------|--------------|
| 1  |                    | geslapen?                  |                               |                        |         |              |
| 2  |                    |                            |                               |                        |         |              |
| 3  |                    |                            |                               |                        |         |              |
| 4  | 10                 | Hoeveel uur heb je         | About how many                | Hours, minutes         | 0 - 24  | Sleep        |
| 5  |                    | afgelopen nacht            | hours did you sleep           |                        |         |              |
| 6  |                    | ongeveer geslapen?         | tonight?                      |                        |         |              |
| 7  |                    |                            |                               |                        |         |              |
| 8  | 11                 | Heb je vandaag             | Did you sleep during          | • No (skip to 13)      | 0 - 1   | Sleep        |
| 9  |                    | overdag geslapen?          | the day today (naps)?         | • Yes                  |         |              |
| 10 |                    | (dutjes)                   |                               |                        |         |              |
| 11 | 12                 | Hoe lang in totaal?        | How long in total did         | Hours, minutes         | 0 - 12  | Sleep        |
| 12 |                    |                            | you sleep during the          |                        |         |              |
| 13 |                    |                            | day today?                    |                        |         |              |
| 14 |                    |                            |                               |                        |         |              |
| 15 | <i>Instruction</i> | <i>Alle items gaan</i>     | <i>From now on, all</i>       |                        |         |              |
| 16 |                    | <i>vanaf nu over de</i>    | <i>items involve the past</i> |                        |         |              |
| 17 |                    | <i>afgelopen dag (denk</i> | <i>day (think about how</i>   |                        |         |              |
| 18 |                    | <i>aan hoe je je</i>       | <i>you felt on average</i>    |                        |         |              |
| 19 |                    | <i>vandaag gemiddeld</i>   | <i>today)</i>                 |                        |         |              |
| 20 |                    | <i>voelde)</i>             |                               |                        |         |              |
| 21 |                    |                            |                               |                        |         |              |
| 22 | 13                 | Ik voelde me               | I felt relaxed today          | Not at all – Very much | 0 – 100 | Positive     |
| 23 |                    | vandaag ontspannen         |                               |                        |         | deactivation |
| 24 | 14                 | Ik voelde me               | I felt calm today             | Not at all – Very much | 0 – 100 | Positive     |
| 25 |                    | vandaag kalm               |                               |                        |         | deactivation |
| 26 | 15                 | Ik voelde me               | I felt satisfied today        | Not at all – Very much | 0 – 100 | Positive     |
| 27 |                    | vandaag tevreden           |                               |                        |         | deactivation |
| 28 | 16                 | Ik voelde me               | I felt energetic today        | Not at all – Very much | 0 – 100 | Positive     |
| 29 |                    | vandaag energiek           |                               |                        |         | activation   |
| 30 | 17                 | Ik voelde me               | I felt enthusiastic           | Not at all – Very much | 0 – 100 | Positive     |
| 31 |                    | vandaag enthousiast        | today                         |                        |         | activation   |
| 32 | 18                 | Ik voelde me               | I felt cheerful today         | Not at all – Very much | 0 – 100 | Positive     |
| 33 |                    | vandaag opgewekt           |                               |                        |         | activation   |
| 34 | 19                 | Ik voelde me               | I felt apathetic today        | Not at all – Very much | 0 – 100 | Negative     |
| 35 |                    | vandaag lusteloos          |                               |                        |         | deactivation |
| 36 | 20                 | Ik voelde me               | I felt tired today            | Not at all – Very much | 0 – 100 | Negative     |
| 37 |                    | vandaag moe                |                               |                        |         | deactivation |
| 38 | 21                 | Ik voelde me               | I felt down today             | Not at all – Very much | 0 – 100 | Negative     |
| 39 |                    |                            |                               |                        |         |              |
| 40 |                    |                            |                               |                        |         |              |
| 41 |                    |                            |                               |                        |         |              |
| 42 |                    |                            |                               |                        |         |              |
| 43 |                    |                            |                               |                        |         |              |
| 44 |                    |                            |                               |                        |         |              |
| 45 |                    |                            |                               |                        |         |              |
| 46 |                    |                            |                               |                        |         |              |
| 47 |                    |                            |                               |                        |         |              |
| 48 |                    |                            |                               |                        |         |              |
| 49 |                    |                            |                               |                        |         |              |

|    |                                               |                                          |                        |         |                         |
|----|-----------------------------------------------|------------------------------------------|------------------------|---------|-------------------------|
|    | vandaag somber                                |                                          |                        |         | deactivation            |
| 22 | Ik voelde me vandaag angstig                  | I felt anxious today                     | Not at all – Very much | 0 – 100 | Negative activation     |
| 23 | Ik voelde me vandaag onrustig                 | I felt restless today                    | Not at all – Very much | 0 – 100 | Negative activation     |
| 24 | Ik voelde me vandaag prikkelbaar              | I felt irritable today                   | Not at all – Very much | 0 – 100 | Negative activation     |
| 25 | Ik voelde me vandaag geïrriteerd              | I felt irritated today                   | Not at all – Very much | 0 – 100 | Irritation              |
| 26 | Ik voelde me vandaag spraakzaam               | I felt talkative today                   | Not at all – Very much | 0 – 100 | Spontaneity             |
| 27 | Ik voelde me vandaag zelfverzekerd            | I felt confident today                   | Not at all – Very much | 0 – 100 | Self confidence         |
| 28 | Ik voelde me vandaag leeg/vlak                | I felt empty today                       | Not at all – Very much | 0 – 100 | Flat affect / Anhedonia |
| 29 | Ik voelde me vandaag ongerust                 | I felt worried today                     | Not at all – Very much | 0 – 100 | Worrying                |
| 30 | Ik voelde me vandaag erg speciaal             | I felt very special today                | Not at all – Very much | 0 – 100 | Delusions               |
| 31 | Ik voelde me vandaag wantrouwig               | I felt suspicious today                  | Not at all – Very much | 0 – 100 | Delusions               |
| 32 | Ik had vandaag het gevoel te kort te schieten | Today I had the feeling of falling short | Not at all – Very much | 0 – 100 | Worthlessness           |
| 33 | Ik kon vandaag aan wat op mijn pad kwam       | Today I could handle what came my way    | Not at all – Very much | 0 – 100 | Resilience              |
| 34 | Ik kon me vandaag goed concentreren           | I could concentrate well today           | Not at all – Very much | 0 – 100 | Concentration           |



|    |    |                     |                         |                        |         |                |
|----|----|---------------------|-------------------------|------------------------|---------|----------------|
| 1  |    |                     |                         |                        |         |                |
| 2  |    |                     |                         |                        |         |                |
| 3  | 35 | Ik vond mijn leven  | I found my life was     | Not at all – Very much | 0 – 100 | Worthlessness  |
| 4  |    | vandaag de moeite   | worthwhile today        |                        |         |                |
| 5  |    | waard               |                         |                        |         |                |
| 6  |    |                     |                         |                        |         |                |
| 7  | 36 | Ik had vandaag last | I was bothered by       | Not at all – Very much | 0 – 100 | Physical       |
| 8  |    | van lichamelijke    | physical symptoms       |                        |         | discomfort     |
| 9  |    | klachten            | today                   |                        |         |                |
| 10 | 37 | Ik had vandaag de   | Today I had the         | Not at all – Very much | 0 – 100 | Disorganized   |
| 11 |    | neiging iets        | tendency to do          |                        |         | thoughts       |
| 12 |    | onbeheersts te doen | something               |                        |         |                |
| 13 |    |                     | unrestrained/wild       |                        |         |                |
| 14 |    |                     |                         |                        |         |                |
| 15 | 38 | Mijn gedachten      | My thoughts wouldn't    | Not at all – Very much | 0 – 100 | Disorganized   |
| 16 |    | lieten me vandaag   | leave me alone today    |                        |         | thoughts       |
| 17 |    | niet los            |                         |                        |         |                |
| 18 | 39 | Mijn gedachten      | My thoughts were        | Not at all – Very much | 0 – 100 | Disorganized   |
| 19 |    | waren vandaag       | racing today            |                        |         | thoughts       |
| 20 |    | versneld            |                         |                        |         |                |
| 21 |    |                     |                         |                        |         |                |
| 22 | 40 | Mijn gedachten      | My thoughts were        | Not at all – Very much | 0 – 100 | Disorganized   |
| 23 |    | waren vandaag       | difficult to express    |                        |         | thoughts       |
| 24 |    | moeilijk te uiten   | today                   |                        |         |                |
| 25 |    |                     |                         |                        |         |                |
| 26 | 41 | Er is vandaag iets  | Today something         | Not at all – Very much | 1 – 7   | Strange        |
| 27 |    | vreemds met mij of  | strange happened to     |                        |         | impressions /  |
| 28 |    | om mij heen         | me or around me that    |                        |         | Delusions      |
| 29 |    | gebeurd dat ik      | was difficult for me to |                        |         |                |
| 30 |    | moeilijk kon        | explain                 |                        |         |                |
| 31 |    | verklaren           |                         |                        |         |                |
| 32 |    |                     |                         |                        |         |                |
| 33 | 42 | Ik hoorde vandaag   | Today I heard voices    | Not at all – Very much | 1 – 7   | Hallucinations |
| 34 |    | stemmen die         | that others couldn't    |                        |         |                |
| 35 |    | anderen niet        | hear                    |                        |         |                |
| 36 |    | hoorden             |                         |                        |         |                |
| 37 | 43 | Ik zag vandaag      | Today I saw things      | Not at all – Very much | 1 – 7   | Hallucinations |
| 38 |    | dingen die anderen  | that others couldn't    |                        |         |                |
| 39 |    | niet zagen          | see                     |                        |         |                |
| 40 |    |                     |                         |                        |         |                |
| 41 | 44 | Ik had vandaag het  | Today I had the         | Not at all – Very much | 0 – 100 | Paranoia       |
| 42 |    |                     |                         |                        |         |                |
| 43 |    |                     |                         |                        |         |                |
| 44 |    |                     |                         |                        |         |                |
| 45 |    |                     |                         |                        |         |                |
| 46 |    |                     |                         |                        |         |                |
| 47 |    |                     |                         |                        |         |                |
| 48 |    |                     |                         |                        |         |                |
| 49 |    |                     |                         |                        |         |                |

|    |    |                     |                          |                                          |                      |
|----|----|---------------------|--------------------------|------------------------------------------|----------------------|
| 1  |    |                     |                          |                                          |                      |
| 2  |    |                     |                          |                                          |                      |
| 3  |    |                     |                          |                                          |                      |
| 4  |    | gevoel dat anderen  | feeling that others did  |                                          |                      |
| 5  |    | me niet mochten     | not like me              |                                          |                      |
| 6  | 45 | Ik had vandaag het  | I felt that others could | Not at all – Very much                   | 0 – 100 Delusions    |
| 7  |    | gevoel dat anderen  | read my thoughts         |                                          |                      |
| 8  |    | mijn gedachten      | today                    |                                          |                      |
| 9  |    | konden lezen        |                          |                                          |                      |
| 10 | 46 | Ik voelde me        | I felt unreal today      | Not at all – Very much                   | 0 – 100 Delusions    |
| 11 |    | vandaag             |                          |                                          |                      |
| 12 |    | onwerkelijk         |                          |                                          |                      |
| 13 | 47 | Ik had vandaag het  | I felt that others could | Not at all – Very much                   | 0 – 100 Delusions    |
| 14 |    | gevoel dat anderen  | control me today         |                                          |                      |
| 15 |    | controle over me    |                          |                                          |                      |
| 16 |    | uitoefenden         |                          |                                          |                      |
| 17 | 48 | Ik kon vandaag      | I could experience       | Not at all – Very much                   | 0 – 100 Flat affect  |
| 18 |    | plezier ervaren     | pleasure when nice       |                                          | /anhedonia           |
| 19 |    | wanneer er leuke    | things happened today    |                                          |                      |
| 20 |    | dingen gebeurden    |                          |                                          |                      |
| 21 | 49 | Er kwam vandaag     | I did not get many       | Not at all – Very much                   | 0 – 100 Motivation / |
| 22 |    | weinig uit mijn     | things done today        |                                          | drive                |
| 23 |    | handen              |                          |                                          |                      |
| 24 | 50 | Ik had vandaag zin  | I felt like undertaking  | Not at all – Very much                   | 0 – 100 Motivation / |
| 25 |    | om dingen te        | something to day         |                                          | drive                |
| 26 |    | ondernemen          |                          |                                          |                      |
| 27 | 51 | Ik deed dingen ‘op  | I did things on          | Not at all – Very much                   | 0 – 100 Mindfulness  |
| 28 |    | de automatische     | automatic without        |                                          |                      |
| 29 |    | piloot’, zonder mij | being conscious of       |                                          |                      |
| 30 |    | erg bewust te zijn  | what I was doing         |                                          |                      |
| 31 |    | van wat ik aan het  | today                    |                                          |                      |
| 32 |    | doen was            |                          |                                          |                      |
| 33 | 52 | Mijn eetlust was    | My appetite today was    | Smaller than normal – Larger than normal | 0 – 100 Appetite     |
| 34 |    | vandaag             |                          |                                          |                      |
| 35 | 53 | Hoe gestrest was je | How stressed were        | Not at all – Very much                   | 0 – 100 Stress       |
| 36 |    | vandaag?            | you today?               |                                          |                      |
| 37 |    |                     |                          |                                          |                      |
| 38 |    |                     |                          |                                          |                      |
| 39 |    |                     |                          |                                          |                      |
| 40 |    |                     |                          |                                          |                      |
| 41 |    |                     |                          |                                          |                      |
| 42 |    |                     |                          |                                          |                      |
| 43 |    |                     |                          |                                          |                      |
| 44 |    |                     |                          |                                          |                      |
| 45 |    |                     |                          |                                          |                      |
| 46 |    |                     |                          |                                          |                      |
| 47 |    |                     |                          |                                          |                      |
| 48 |    |                     |                          |                                          |                      |
| 49 |    |                     |                          |                                          |                      |

|    |                    |                           |                             |                                   |                         |
|----|--------------------|---------------------------|-----------------------------|-----------------------------------|-------------------------|
| 1  |                    |                           |                             |                                   |                         |
| 2  |                    |                           |                             |                                   |                         |
| 3  | 54                 | In welke mate zijn        | To what extent did          | Not at all – Very much            | 0 – 100 Positive events |
| 4  |                    | er vandaag positieve      | positive events happen      |                                   |                         |
| 5  |                    | gebeurtenissen            | today?                      |                                   |                         |
| 6  |                    | geweest?                  |                             |                                   |                         |
| 7  |                    |                           |                             |                                   |                         |
| 8  | <i>Instruction</i> | <i>Denk aan de</i>        | <i>Think about the most</i> |                                   |                         |
| 9  |                    | <i>belangrijkste</i>      | <i>important positive</i>   |                                   |                         |
| 10 |                    | <i>positieve</i>          | <i>event of today</i>       |                                   |                         |
| 11 |                    | <i>gebeurtenis van de</i> |                             |                                   |                         |
| 12 |                    | <i>afgelopen dag</i>      |                             |                                   |                         |
| 13 |                    |                           |                             |                                   |                         |
| 14 | 55                 | Hoe plezierig was         | How pleasant was this       | Neutral – Very pleasant           | 0 – 100 Positive events |
| 15 |                    | deze gebeurtenis?         | event?                      |                                   |                         |
| 16 | 56                 | Hoe belangrijk was        | How important was           | Very unimportant – Very important | 0 – 100 Positive events |
| 17 |                    | deze gebeurtenis          | this positive event to      |                                   |                         |
| 18 |                    | voor mij?                 | me?                         |                                   |                         |
| 19 |                    |                           |                             |                                   |                         |
| 20 | 57                 | Was deze positieve        | Was this positive           | • No (skip to 59)                 | 0 - 1 Positive events   |
| 21 |                    | gebeurtenis               | event planned?              | • Yes                             |                         |
| 22 |                    | gepland?                  |                             |                                   |                         |
| 23 |                    |                           |                             |                                   |                         |
| 24 | 58                 | Ik keek er naar uit       | I was looking forward       | Not at all – Very much            | 0 – 100 Positive events |
| 25 |                    |                           | to it                       |                                   |                         |
| 26 | 59                 | In welke mate zijn        | To what extent did          | Not at all – Very much            | 0 – 100 Negative events |
| 27 |                    | er vandaag                | negative events             |                                   |                         |
| 28 |                    | negatieve                 | happen today?               |                                   |                         |
| 29 |                    | gebeurtenissen            |                             |                                   |                         |
| 30 |                    | geweest?                  |                             |                                   |                         |
| 31 |                    |                           |                             |                                   |                         |
| 32 | <i>Instruction</i> | <i>Denk aan de</i>        | <i>Think about the most</i> |                                   |                         |
| 33 |                    | <i>belangrijkste</i>      | <i>important negative</i>   |                                   |                         |
| 34 |                    | <i>negatieve</i>          | <i>event of today</i>       |                                   |                         |
| 35 |                    | <i>gebeurtenis van de</i> |                             |                                   |                         |
| 36 |                    | <i>afgelopen dag</i>      |                             |                                   |                         |
| 37 |                    |                           |                             |                                   |                         |
| 38 | 60                 | Hoe onplezierig was       | How unpleasant was          | Very unpleasant - Neutral         | 0 – 100 Negative events |
| 39 |                    | deze gebeurtenis?         | this event?                 |                                   |                         |
| 40 | 61                 | Hoe belangrijk was        | How important was           | Very unimportant – Very important | 0 – 100 Negative events |
| 41 |                    | deze gebeurtenis          | this negative event to      |                                   |                         |
| 42 |                    |                           |                             |                                   |                         |
| 43 |                    |                           |                             |                                   |                         |
| 44 |                    |                           |                             |                                   |                         |
| 45 |                    |                           |                             |                                   |                         |
| 46 |                    |                           |                             |                                   |                         |
| 47 |                    |                           |                             |                                   |                         |
| 48 |                    |                           |                             |                                   |                         |
| 49 |                    |                           |                             |                                   |                         |

|    |    |                                                                                                      |                                                              |                                                                                                                                                                                                                                                                                                                                                                                                                                                                           |                                       |                        |
|----|----|------------------------------------------------------------------------------------------------------|--------------------------------------------------------------|---------------------------------------------------------------------------------------------------------------------------------------------------------------------------------------------------------------------------------------------------------------------------------------------------------------------------------------------------------------------------------------------------------------------------------------------------------------------------|---------------------------------------|------------------------|
| 1  |    |                                                                                                      |                                                              |                                                                                                                                                                                                                                                                                                                                                                                                                                                                           |                                       |                        |
| 2  |    |                                                                                                      |                                                              |                                                                                                                                                                                                                                                                                                                                                                                                                                                                           |                                       |                        |
| 3  |    |                                                                                                      |                                                              |                                                                                                                                                                                                                                                                                                                                                                                                                                                                           |                                       |                        |
| 4  | 62 | voor mij?<br>Was deze negatieve<br>gebeurtenis<br>gepland?                                           | me?<br>Was this negative<br>event planned?                   | <ul style="list-style-type: none"> <li>• No (skip to 59)</li> <li>• Yes</li> </ul>                                                                                                                                                                                                                                                                                                                                                                                        | 0 - 1                                 | Negative<br>events     |
| 5  |    |                                                                                                      |                                                              |                                                                                                                                                                                                                                                                                                                                                                                                                                                                           |                                       |                        |
| 6  |    |                                                                                                      |                                                              |                                                                                                                                                                                                                                                                                                                                                                                                                                                                           |                                       |                        |
| 7  |    |                                                                                                      |                                                              |                                                                                                                                                                                                                                                                                                                                                                                                                                                                           |                                       |                        |
| 8  |    |                                                                                                      |                                                              |                                                                                                                                                                                                                                                                                                                                                                                                                                                                           |                                       |                        |
| 9  | 63 | Ik zag er tegen op                                                                                   | I dreaded it                                                 | Not at all – Very much                                                                                                                                                                                                                                                                                                                                                                                                                                                    | 0 – 100                               | Negative<br>events     |
| 10 |    |                                                                                                      |                                                              |                                                                                                                                                                                                                                                                                                                                                                                                                                                                           |                                       |                        |
| 11 | 64 | Welke gebeurtenis<br>was het meest<br>spannend of<br>stressvol?                                      | Which event was most<br>exciting or stressful?               | <ul style="list-style-type: none"> <li>• The negative event</li> <li>• The positive event</li> </ul>                                                                                                                                                                                                                                                                                                                                                                      | 1 - 2                                 | Event<br>stressfulness |
| 12 |    |                                                                                                      |                                                              |                                                                                                                                                                                                                                                                                                                                                                                                                                                                           |                                       |                        |
| 13 |    |                                                                                                      |                                                              |                                                                                                                                                                                                                                                                                                                                                                                                                                                                           |                                       |                        |
| 14 |    |                                                                                                      |                                                              |                                                                                                                                                                                                                                                                                                                                                                                                                                                                           |                                       |                        |
| 15 | 65 | Hoe stressvol of<br>spannend was deze<br>gebeurtenis?                                                | How stressful or<br>exciting was this<br>event?              | Not at all – Very much                                                                                                                                                                                                                                                                                                                                                                                                                                                    | 0 – 100                               | Event<br>stressfulness |
| 16 |    |                                                                                                      |                                                              |                                                                                                                                                                                                                                                                                                                                                                                                                                                                           |                                       |                        |
| 17 |    |                                                                                                      |                                                              |                                                                                                                                                                                                                                                                                                                                                                                                                                                                           |                                       |                        |
| 18 |    |                                                                                                      |                                                              |                                                                                                                                                                                                                                                                                                                                                                                                                                                                           |                                       |                        |
| 19 | 66 | Hoe ben je met deze<br>(stressvolle)<br>gebeurtenis<br>omgegaan? Ik ben<br>hiermee omgegaan<br>door: | How did you cope<br>with this event? I dealt<br>with this by | <ul style="list-style-type: none"> <li>• Actively addressing or solving the situation</li> <li>• Talking to someone</li> <li>• Avoiding the situation</li> <li>• Seeking distraction (e.g. exercise, smoking, watching television)</li> <li>• Thinking about it a lot</li> <li>• Expressing my frustration</li> <li>• Reassuring myself or by putting things in perspective</li> <li>• Gently observing and accepting my feelings</li> <li>• None of the above</li> </ul> | 0 – 1<br>for<br>every<br>check<br>box | Coping                 |
| 20 |    |                                                                                                      |                                                              |                                                                                                                                                                                                                                                                                                                                                                                                                                                                           |                                       |                        |
| 21 |    |                                                                                                      |                                                              |                                                                                                                                                                                                                                                                                                                                                                                                                                                                           |                                       |                        |
| 22 |    |                                                                                                      |                                                              |                                                                                                                                                                                                                                                                                                                                                                                                                                                                           |                                       |                        |
| 23 |    |                                                                                                      |                                                              |                                                                                                                                                                                                                                                                                                                                                                                                                                                                           |                                       |                        |
| 24 |    |                                                                                                      |                                                              |                                                                                                                                                                                                                                                                                                                                                                                                                                                                           |                                       |                        |
| 25 |    |                                                                                                      |                                                              |                                                                                                                                                                                                                                                                                                                                                                                                                                                                           |                                       |                        |
| 26 |    |                                                                                                      |                                                              |                                                                                                                                                                                                                                                                                                                                                                                                                                                                           |                                       |                        |
| 27 |    |                                                                                                      |                                                              |                                                                                                                                                                                                                                                                                                                                                                                                                                                                           |                                       |                        |
| 28 |    |                                                                                                      |                                                              |                                                                                                                                                                                                                                                                                                                                                                                                                                                                           |                                       |                        |
| 29 |    |                                                                                                      |                                                              |                                                                                                                                                                                                                                                                                                                                                                                                                                                                           |                                       |                        |
| 30 |    |                                                                                                      |                                                              |                                                                                                                                                                                                                                                                                                                                                                                                                                                                           |                                       |                        |
| 31 |    |                                                                                                      |                                                              |                                                                                                                                                                                                                                                                                                                                                                                                                                                                           |                                       |                        |
| 32 |    |                                                                                                      |                                                              |                                                                                                                                                                                                                                                                                                                                                                                                                                                                           |                                       |                        |
| 33 |    |                                                                                                      |                                                              |                                                                                                                                                                                                                                                                                                                                                                                                                                                                           |                                       |                        |
| 34 |    |                                                                                                      |                                                              |                                                                                                                                                                                                                                                                                                                                                                                                                                                                           |                                       |                        |
| 35 | 67 | Hoeveel ben ik<br>vandaag alleen<br>geweest?                                                         | How much was I alone<br>today?                               | Not for a moment – The whole day<br>(if “Not for a moment”, skip to 69)<br>(if “The whole day”, go to 68, and thereafter<br>skip to 70)                                                                                                                                                                                                                                                                                                                                   | 1 - 7                                 | Social context         |
| 36 |    |                                                                                                      |                                                              |                                                                                                                                                                                                                                                                                                                                                                                                                                                                           |                                       |                        |
| 37 |    |                                                                                                      |                                                              |                                                                                                                                                                                                                                                                                                                                                                                                                                                                           |                                       |                        |
| 38 |    |                                                                                                      |                                                              |                                                                                                                                                                                                                                                                                                                                                                                                                                                                           |                                       |                        |
| 39 |    |                                                                                                      |                                                              |                                                                                                                                                                                                                                                                                                                                                                                                                                                                           |                                       |                        |
| 40 | 68 | Ik was liever wat<br>meer in gezelschap                                                              | I would have preferred<br>more company                       | Not at all – Very much                                                                                                                                                                                                                                                                                                                                                                                                                                                    | 0 – 100                               | Social context         |
| 41 |    |                                                                                                      |                                                              |                                                                                                                                                                                                                                                                                                                                                                                                                                                                           |                                       |                        |
| 42 |    |                                                                                                      |                                                              |                                                                                                                                                                                                                                                                                                                                                                                                                                                                           |                                       |                        |
| 43 |    |                                                                                                      |                                                              |                                                                                                                                                                                                                                                                                                                                                                                                                                                                           |                                       |                        |
| 44 |    |                                                                                                      |                                                              |                                                                                                                                                                                                                                                                                                                                                                                                                                                                           |                                       |                        |
| 45 |    |                                                                                                      |                                                              |                                                                                                                                                                                                                                                                                                                                                                                                                                                                           |                                       |                        |
| 46 |    |                                                                                                      |                                                              |                                                                                                                                                                                                                                                                                                                                                                                                                                                                           |                                       |                        |
| 47 |    |                                                                                                      |                                                              |                                                                                                                                                                                                                                                                                                                                                                                                                                                                           |                                       |                        |
| 48 |    |                                                                                                      |                                                              |                                                                                                                                                                                                                                                                                                                                                                                                                                                                           |                                       |                        |
| 49 |    |                                                                                                      |                                                              |                                                                                                                                                                                                                                                                                                                                                                                                                                                                           |                                       |                        |

|    |                    |                          |                              |                                                                                                                                                                                                                                  |         |                |
|----|--------------------|--------------------------|------------------------------|----------------------------------------------------------------------------------------------------------------------------------------------------------------------------------------------------------------------------------|---------|----------------|
| 1  |                    | geweest                  |                              |                                                                                                                                                                                                                                  |         |                |
| 2  |                    |                          |                              |                                                                                                                                                                                                                                  |         |                |
| 3  |                    |                          |                              |                                                                                                                                                                                                                                  |         |                |
| 4  |                    | Ik vond het              | I found today's              | Very unpleasant – Very pleasant                                                                                                                                                                                                  | 0 – 100 | Social context |
| 5  | 69                 | gezelschap van           | company mostly               |                                                                                                                                                                                                                                  |         |                |
| 6  |                    | vandaag                  |                              |                                                                                                                                                                                                                                  |         |                |
| 7  |                    | overwegend               |                              |                                                                                                                                                                                                                                  |         |                |
| 8  |                    |                          |                              |                                                                                                                                                                                                                                  |         |                |
| 9  | 70                 | Voelde je je             | Did you feel supported       | Not at all – Very much                                                                                                                                                                                                           | 0 – 100 | Social context |
| 10 |                    | vandaag gesteund?        | today?                       |                                                                                                                                                                                                                                  |         |                |
| 11 | 71                 | Ik had liever meer       | I would have liked to        | Not at all – Very much                                                                                                                                                                                                           | 0 – 100 | Social context |
| 12 |                    | steun gevoeld            | feel more support            |                                                                                                                                                                                                                                  |         |                |
| 13 | 72                 | Heb je vandaag met       | Have you had a               | <ul style="list-style-type: none"> <li>• No (skip to 78)</li> <li>• Yes</li> </ul>                                                                                                                                               | 0 – 1   | Social context |
| 14 |                    | iemand een gesprek       | conversation with            |                                                                                                                                                                                                                                  |         |                |
| 15 |                    | gevoerd?                 | someone today?               |                                                                                                                                                                                                                                  |         |                |
| 16 | <i>Instruction</i> | <i>Denk aan het voor</i> | <i>Think about the most</i>  |                                                                                                                                                                                                                                  |         |                |
| 17 |                    | <i>jou belangrijkste</i> | <i>important</i>             |                                                                                                                                                                                                                                  |         |                |
| 18 |                    | <i>gesprek van</i>       | <i>conversation of today</i> |                                                                                                                                                                                                                                  |         |                |
| 19 |                    | <i>vandaag (mag ook</i>  |                              |                                                                                                                                                                                                                                  |         |                |
| 20 |                    | <i>via telefoon of</i>   |                              |                                                                                                                                                                                                                                  |         |                |
| 21 |                    | <i>mobiele</i>           |                              |                                                                                                                                                                                                                                  |         |                |
| 22 |                    | <i>berichtenapp)</i>     |                              |                                                                                                                                                                                                                                  |         |                |
| 23 | 73                 | Met wie was dit          | With whom was this           | <ul style="list-style-type: none"> <li>• Family (except partner) <ul style="list-style-type: none"> <li>○ Father</li> <li>○ Mother</li> <li>○ Other</li> </ul> </li> <li>• Partner</li> <li>• Friend</li> <li>• Other</li> </ul> | 1 - 7   | Social context |
| 24 |                    | gesprek?                 | conversation?                |                                                                                                                                                                                                                                  |         |                |
| 25 |                    |                          |                              |                                                                                                                                                                                                                                  |         |                |
| 26 |                    |                          |                              |                                                                                                                                                                                                                                  |         |                |
| 27 |                    |                          |                              |                                                                                                                                                                                                                                  |         |                |
| 28 |                    |                          |                              |                                                                                                                                                                                                                                  |         |                |
| 29 |                    |                          |                              |                                                                                                                                                                                                                                  |         |                |
| 30 |                    |                          |                              |                                                                                                                                                                                                                                  |         |                |
| 31 |                    |                          |                              |                                                                                                                                                                                                                                  |         |                |
| 32 |                    |                          |                              |                                                                                                                                                                                                                                  |         |                |
| 33 |                    |                          |                              |                                                                                                                                                                                                                                  |         |                |
| 34 |                    |                          |                              |                                                                                                                                                                                                                                  |         |                |
| 35 | 74                 | Hoe kritisch was         | How critical was this        | Not at all – Very much                                                                                                                                                                                                           | 0 – 100 | Expressed      |
| 36 |                    | deze persoon naar        | person towards you?          |                                                                                                                                                                                                                                  |         | emotions       |
| 37 |                    | jou toe?                 |                              |                                                                                                                                                                                                                                  |         |                |
| 38 | 75                 | Hoe warm was deze        | How warm was this            | Not at all – Very much                                                                                                                                                                                                           | 0 – 100 | Expressed      |
| 39 |                    | persoon naar jou         | person towards you?          |                                                                                                                                                                                                                                  |         | emotions       |
| 40 |                    | toe?                     |                              |                                                                                                                                                                                                                                  |         |                |
| 41 | 76                 | In welke mate            | To what extent did this      | Not at all – Very much                                                                                                                                                                                                           | 0 – 100 | Expressed      |
| 42 |                    |                          |                              |                                                                                                                                                                                                                                  |         |                |
| 43 |                    |                          |                              |                                                                                                                                                                                                                                  |         |                |
| 44 |                    |                          |                              |                                                                                                                                                                                                                                  |         |                |
| 45 |                    |                          |                              |                                                                                                                                                                                                                                  |         |                |
| 46 |                    |                          |                              |                                                                                                                                                                                                                                  |         |                |
| 47 |                    |                          |                              |                                                                                                                                                                                                                                  |         |                |
| 48 |                    |                          |                              |                                                                                                                                                                                                                                  |         |                |
| 49 |                    |                          |                              |                                                                                                                                                                                                                                  |         |                |

|                    |                                               |                                           |                                                                                                                                                                                                                                 |         |                       |
|--------------------|-----------------------------------------------|-------------------------------------------|---------------------------------------------------------------------------------------------------------------------------------------------------------------------------------------------------------------------------------|---------|-----------------------|
|                    | bemoeide deze persoon zich teveel met jou?    | person interfere too much with you        |                                                                                                                                                                                                                                 |         | emotions              |
| 77                 | Ik voel me verbonden met deze persoon         | I felt connected with this person         | Not at all – Very much                                                                                                                                                                                                          | 0 – 100 | Social context        |
| 78                 | Ik heb vandaag de volgende middelen gebruikt: | I have used the following substance today | <ul style="list-style-type: none"> <li>• Prescribed medication</li> <li>• Alcohol</li> <li>• Hash/Cannabis</li> <li>• Stimulating drugs</li> <li>• Calming drugs</li> <li>• Other drugs</li> <li>• None of the above</li> </ul> |         | Substance use         |
| 79                 | Ik ben vandaag lichamelijk actief geweest     | I have been physically active today       | Not at all – Very much                                                                                                                                                                                                          | 0 – 100 | Physical activity     |
| 80                 | Heb je vandaag goed kunnen functioneren?      | Were you able to function well today?     | Not at all – Very much                                                                                                                                                                                                          | 0 – 100 | Functioning           |
| <i>Instruction</i> | <i>Het volgende item gaat over morgen</i>     | <i>The next item is about tomorrow</i>    |                                                                                                                                                                                                                                 |         |                       |
| 81                 | Ik heb zin in morgen                          | I look forward to tomorrow                | Not at all – Very much                                                                                                                                                                                                          | 0 – 100 | Interest / motivation |

STROBE Statement—Checklist of items that should be included in reports of *cohort studies*

|                                 | Item No | Recommendation                                                                                                                                                                                                                                                                                                                                                                                                |
|---------------------------------|---------|---------------------------------------------------------------------------------------------------------------------------------------------------------------------------------------------------------------------------------------------------------------------------------------------------------------------------------------------------------------------------------------------------------------|
| <b>Title and abstract</b>       | 1       | (a) Indicate the study's design with a commonly used term in the title or the abstract<br>(b) Provide in the abstract an informative and balanced summary of what was done and what was found                                                                                                                                                                                                                 |
| <b>Introduction</b>             |         |                                                                                                                                                                                                                                                                                                                                                                                                               |
| <b>Background/rationale</b>     | 2       | Explain the scientific background and rationale for the investigation being reported                                                                                                                                                                                                                                                                                                                          |
| <b>Objectives</b>               | 3       | State specific objectives, including any prespecified hypotheses                                                                                                                                                                                                                                                                                                                                              |
| <b>Methods</b>                  |         |                                                                                                                                                                                                                                                                                                                                                                                                               |
| <b>Study design</b>             | 4       | Present key elements of study design early in the paper                                                                                                                                                                                                                                                                                                                                                       |
| <b>Setting</b>                  | 5       | Describe the setting, locations, and relevant dates, including periods of recruitment, exposure, follow-up, and data collection                                                                                                                                                                                                                                                                               |
| <b>Participants</b>             | 6       | (a) Give the eligibility criteria, and the sources and methods of selection of participants. Describe methods of follow-up<br>(b) For matched studies, give matching criteria and number of exposed and unexposed                                                                                                                                                                                             |
| <b>Variables</b>                | 7       | Clearly define all outcomes, exposures, predictors, potential confounders, and effect modifiers. Give diagnostic criteria, if applicable                                                                                                                                                                                                                                                                      |
| <b>Data sources/measurement</b> | 8*      | For each variable of interest, give sources of data and details of methods of assessment (measurement). Describe comparability of assessment methods if there is more than one group                                                                                                                                                                                                                          |
| <b>Bias</b>                     | 9       | Describe any efforts to address potential sources of bias                                                                                                                                                                                                                                                                                                                                                     |
| <b>Study size</b>               | 10      | Explain how the study size was arrived at                                                                                                                                                                                                                                                                                                                                                                     |
| <b>Quantitative variables</b>   | 11      | Explain how quantitative variables were handled in the analyses. If applicable, describe which groupings were chosen and why                                                                                                                                                                                                                                                                                  |
| <b>Statistical methods</b>      | 12      | (a) Describe all statistical methods, including those used to control for confounding<br>(b) Describe any methods used to examine subgroups and interactions<br>(c) Explain how missing data were addressed<br>(d) If applicable, explain how loss to follow-up was addressed<br>(e) Describe any sensitivity analyses                                                                                        |
| <b>Results</b>                  |         |                                                                                                                                                                                                                                                                                                                                                                                                               |
| Participants                    | 13*     | (a) Report numbers of individuals at each stage of study—eg numbers potentially eligible, examined for eligibility, confirmed eligible, included in the study, completing follow-up, and analysed<br>(b) Give reasons for non-participation at each stage<br>(c) Consider use of a flow diagram                                                                                                               |
| Descriptive data                | 14*     | (a) Give characteristics of study participants (eg demographic, clinical, social) and information on exposures and potential confounders<br>(b) Indicate number of participants with missing data for each variable of interest<br>(c) Summarise follow-up time (eg, average and total amount)                                                                                                                |
| Outcome data                    | 15*     | Report numbers of outcome events or summary measures over time                                                                                                                                                                                                                                                                                                                                                |
| Main results                    | 16      | (a) Give unadjusted estimates and, if applicable, confounder-adjusted estimates and their precision (eg, 95% confidence interval). Make clear which confounders were adjusted for and why they were included<br>(b) Report category boundaries when continuous variables were categorized<br>(c) If relevant, consider translating estimates of relative risk into absolute risk for a meaningful time period |

|                          |    |                                                                                                                                                                            |
|--------------------------|----|----------------------------------------------------------------------------------------------------------------------------------------------------------------------------|
| Other analyses           | 17 | Report other analyses done—eg analyses of subgroups and interactions, and sensitivity analyses                                                                             |
| <b>Discussion</b>        |    |                                                                                                                                                                            |
| Key results              | 18 | Summarise key results with reference to study objectives                                                                                                                   |
| Limitations              | 19 | Discuss limitations of the study, taking into account sources of potential bias or imprecision. Discuss both direction and magnitude of any potential bias                 |
| Interpretation           | 20 | Give a cautious overall interpretation of results considering objectives, limitations, multiplicity of analyses, results from similar studies, and other relevant evidence |
| Generalisability         | 21 | Discuss the generalisability (external validity) of the study results                                                                                                      |
| <b>Other information</b> |    |                                                                                                                                                                            |
| Funding                  | 22 | Give the source of funding and the role of the funders for the present study and, if applicable, for the original study on which the present article is based              |

\*Give information separately for exposed and unexposed groups.

**Note:** An Explanation and Elaboration article discusses each checklist item and gives methodological background and published examples of transparent reporting. The STROBE checklist is best used in conjunction with this article (freely available on the Web sites of PLoS Medicine at <http://www.plosmedicine.org/>, Annals of Internal Medicine at <http://www.annals.org/>, and Epidemiology at <http://www.epidem.com/>). Information on the STROBE Initiative is available at <http://www.strobe-statement.org>.



# BMJ Open

## A study protocol for a prospective cohort study examining the predictive potential of dynamic symptom networks for the onset and progression of psychosis: The Mapping Individual Routes of Risk and Resilience (Mirorr) study



|                                 |                                                                                                                                                                                                                                                                                                                                                                                                                                                                                                                                                                                                                                                                                                                                                                                                                                                                         |
|---------------------------------|-------------------------------------------------------------------------------------------------------------------------------------------------------------------------------------------------------------------------------------------------------------------------------------------------------------------------------------------------------------------------------------------------------------------------------------------------------------------------------------------------------------------------------------------------------------------------------------------------------------------------------------------------------------------------------------------------------------------------------------------------------------------------------------------------------------------------------------------------------------------------|
| Journal:                        | <i>BMJ Open</i>                                                                                                                                                                                                                                                                                                                                                                                                                                                                                                                                                                                                                                                                                                                                                                                                                                                         |
| Manuscript ID                   | bmjopen-2017-019059.R1                                                                                                                                                                                                                                                                                                                                                                                                                                                                                                                                                                                                                                                                                                                                                                                                                                                  |
| Article Type:                   | Protocol                                                                                                                                                                                                                                                                                                                                                                                                                                                                                                                                                                                                                                                                                                                                                                                                                                                                |
| Date Submitted by the Author:   | 25-Sep-2017                                                                                                                                                                                                                                                                                                                                                                                                                                                                                                                                                                                                                                                                                                                                                                                                                                                             |
| Complete List of Authors:       | Booij, Sanne; University of Groningen, University Medical Center Groningen, Interdisciplinary Center Psychopathology and Emotion regulation<br>Wichers, Marieke; University of Groningen, University Medical Center Groningen, Interdisciplinary Center Psychopathology and Emotion regulation<br>de Jonge, Peter; University of Groningen, Department of Developmental Psychology<br>Sytéma, Sjoerd; University of Groningen, University Medical Center Groningen, Interdisciplinary Center Psychopathology and Emotion regulation<br>van Os, Jim; Maastricht University Medical Centre, Psychiatry and Medical Psychology<br>Wunderink, Lex; Friesland Mental Health Services, Department of Research and Education<br>Wigman, Johanna; University of Groningen, University Medical Center Groningen, Interdisciplinary Center Psychopathology and Emotion regulation |
| <b>Primary Subject Heading</b>: | Mental health                                                                                                                                                                                                                                                                                                                                                                                                                                                                                                                                                                                                                                                                                                                                                                                                                                                           |
| Secondary Subject Heading:      | Mental health                                                                                                                                                                                                                                                                                                                                                                                                                                                                                                                                                                                                                                                                                                                                                                                                                                                           |
| Keywords:                       | PSYCHIATRY, Child & adolescent psychiatry < PSYCHIATRY, Schizophrenia & psychotic disorders < PSYCHIATRY, MENTAL HEALTH                                                                                                                                                                                                                                                                                                                                                                                                                                                                                                                                                                                                                                                                                                                                                 |
|                                 |                                                                                                                                                                                                                                                                                                                                                                                                                                                                                                                                                                                                                                                                                                                                                                                                                                                                         |

SCHOLARONE™  
Manuscripts

1  
2  
3 1 **Title: A study protocol for a prospective cohort study examining the predictive potential of**  
4  
5  
6 2 **dynamic symptom networks for the onset and progression of psychosis: The Mapping**  
7  
8 3 **Individual Routes of Risk and Resilience (Mirror) study**

9  
10 4 Sanne H. Booij<sup>1,2\*</sup>, Marieke Wichers<sup>1</sup>, Peter de Jonge<sup>1,3</sup>, Sjoerd Sytema<sup>1</sup>, Jim van Os<sup>4,5</sup>, Lex  
11  
12 5 Wunderink<sup>1,2</sup>, Johanna T.W. Wigman<sup>1,2</sup>

13  
14  
15 6  
16  
17 7 <sup>1</sup> Interdisciplinary Centre Psychopathology and Emotion regulation, Department of Psychiatry,  
18  
19 8 University of Groningen, University Medical Centre Groningen, CC72, P.O. Box 30.001, 9700  
20  
21 9 RB Groningen, The Netherlands

22  
23  
24 10 <sup>2</sup> Department of Research and Education, Friesland Mental Health Services, PO Box 932, 8901  
25  
26 11 Leeuwarden, The Netherlands

27  
28  
29 12 <sup>3</sup> Department of Developmental Psychology, Research Program Interdisciplinary Center  
30  
31 13 Psychopathology and Emotion Regulation, University of Groningen, Grote Kruisstraat 2/1  
32  
33 14 9712 TS, Groningen, The Netherlands

34  
35  
36 15 <sup>4</sup> Department of Psychiatry and Psychology, School of Mental Health and Neuroscience,  
37  
38 16 EURON, Maastricht University Medical Centre, P.O. Box 616, 6200 MD, Maastricht, The  
39  
40 17 Netherlands

41  
42  
43 18 <sup>5</sup> King's College London, King's Health Partners, Department of Psychosis Studies, Institute of  
44  
45 19 Psychiatry, London, UK

46  
47  
48 20  
49  
50 21 \* Corresponding author

51  
52  
53 22 S.H. Booij, Interdisciplinary Centre Psychopathology and Emotion regulation (ICPE),  
54  
55 23 University of Groningen, University Medical Centre Groningen,

1  
2  
3 24 P.O. Box 30.001, 9700 RB, Groningen, The Netherlands  
4

5 25 Telephone: +31-50-3615733, Fax: +31-50-3619722, E-mail: [s.h.booij@umcg.nl](mailto:s.h.booij@umcg.nl)  
6  
7

8 26  
9

10 27 E-mail co-authors:  
11

12 28 Marieke Wichers: [m.c.wichers@umcg.nl](mailto:m.c.wichers@umcg.nl)  
13

14 29 Peter de Jonge: [peter.de.jonge@rug.nl](mailto:peter.de.jonge@rug.nl)  
15  
16

17 30 Sjoerd Sytema: [s.sytema@umcg.nl](mailto:s.sytema@umcg.nl)  
18

19 31 Jim van Os: [j.vanos@maastrichtuniversity.nl](mailto:j.vanos@maastrichtuniversity.nl)  
20  
21

22 32 Lex Wunderink: [lex.wunderink@ggzfriesland.nl](mailto:lex.wunderink@ggzfriesland.nl)  
23

24 33 Johanna T.W. Wigman: [j.t.w.wigman@umcg.nl](mailto:j.t.w.wigman@umcg.nl)  
25  
26

27 34  
28  
29  
30  
31  
32  
33  
34  
35  
36  
37  
38  
39  
40  
41  
42  
43  
44  
45  
46  
47  
48  
49  
50  
51  
52  
53  
54  
55  
56  
57  
58  
59  
60

1  
2  
3 35 **Abstract** (295 words)  
4  
5  
6 36  
7

8 37 Introduction: Our current ability to predict the course and outcome of early psychotic symptoms  
9  
10 38 is limited, hampering timely treatment. To improve our understanding of the development of  
11  
12 39 psychosis, a different approach to psychopathology may be productive. We propose to re-  
13  
14 40 conceptualize psychopathology from a network perspective, according to which symptoms act as  
15  
16 41 a dynamic, interconnected system, impacting on each other over time and across diagnostic  
17  
18 42 boundaries to form symptom networks. Adopting this network approach, the Mapping Individual  
19  
20 43 Routes of Risk and Resilience (Mirorr) study aims to determine whether characteristics of  
21  
22 44 symptom networks can predict illness course and outcome of early psychotic symptoms.  
23  
24  
25  
26  
27 45

28  
29 46 Methods and analysis: The sample consists of N=100 participants aged 18-35 years, divided into  
30  
31 47 four subgroups (N=4x25) with increasing levels of severity of psychopathology, representing  
32  
33 48 successive stages of clinical progression. Individuals representing the initial stage have a  
34  
35 49 relatively low expression of psychotic experiences (general population), whereas individuals  
36  
37 50 representing the end stage are help-seeking and display a psychometric expression of psychosis,  
38  
39 51 putting them at ultra-high risk for transition to psychotic disorder. At baseline and 1-year follow-  
40  
41 52 up, participants report their symptoms, affective states and experiences for three consecutive  
42  
43 53 months in short, daily questionnaires on their smartphone, which will be used to map individual  
44  
45 54 networks. Network parameters, including the strength and directionality of symptom connections  
46  
47 55 and centrality indices, will be estimated, and associated to individual differences in and within-  
48  
49 56 individual progression through stages of clinical severity and functioning over the next three  
50  
51 57 years.  
52  
53  
54  
55  
56  
57  
58  
59  
60

1  
2  
3 58  
4  
5  
6 59 Ethics and dissemination: The study has been approved by the local medical ethical committee  
7  
8 60 (ABR no. NL52974.042.15). The results of the study will be published in (inter)national peer-  
9  
10 61 reviewed journals, presented at research, clinical and general public conferences. The results will  
11  
12 62 assist in improving and fine-tuning dynamic models of psychopathology, stimulating both  
13  
14 63 clinical and scientific progress.  
15  
16  
17  
18 64

19  
20 65 Trial registration:

21  
22 66 Netherlands Trial Register NTR6205, Registered 27 October 2016.

23  
24 67 <http://www.trialregister.nl/trialreg/admin/rctview.asp?TC=6205>  
25  
26  
27 68

28  
29 69 Strengths and limitations of this study:

- 30  
31  
32 70 • One of the first studies examining the predictive potential of dynamic symptoms  
33  
34 71 networks for the onset and progression of psychopathology  
35  
36 72 • The study design allows considering within- and between-individual variation in  
37  
38 73 symptomatology, both at the micro (day) and macro (year) level  
39  
40 74 • A dynamic, transdiagnostic approach is adopted; outcome measures include clinical  
41  
42 75 stage, diagnosis, symptoms of a broad range of disorders and functioning  
43  
44 76 • With three yearly follow-ups, we may not capture all transitions to psychosis  
45  
46 77 • The exploratory nature of the study warrants replication of the findings  
47  
48  
49  
50  
51 78  
52  
53 79  
54  
55 80  
56  
57  
58  
59  
60

1  
2  
3  
4  
5  
6  
7  
8  
9  
10  
11  
12  
13  
14  
15  
16  
17  
18  
19  
20  
21  
22  
23  
24  
25  
26  
27  
28  
29  
30  
31  
32  
33  
34  
35  
36  
37  
38  
39  
40  
41  
42  
43  
44  
45  
46  
47  
48  
49  
50  
51  
52  
53  
54  
55  
56  
57  
58  
59  
60

81 Words (main text): 5035

For peer review only

## 82 Introduction

83 Psychotic disorders are among the most severe mental disorders in terms of individual and  
84 societal impact [1, 2]. Therefore, early detection and intervention in psychosis should be highly  
85 prioritized [3], which is increasingly acknowledged [4]. Psychosis is currently conceptualized as  
86 a continuum of psychotic severity, encompassing both subclinical and clinical expression [5]. As  
87 such, psychotic symptoms do not only present in the context of psychotic disorders, but also  
88 across other, non-psychotic disorders [6, 7].

89  
90 Current diagnostic systems in psychiatry are challenged by issues such as high levels of  
91 comorbidity, clinical heterogeneity, non-specific treatment effects, and lack of diagnosis-specific  
92 biological/ cognitive markers [8-12]. Despite this, traditional diagnoses still dominate psychiatric  
93 research, hampering scientific progress. These diagnoses are based on clinical presentation of  
94 adults with long-established illness [13], and classify individuals according to distinct diagnostic  
95 labels [8] (e.g. schizophrenia or major depressive disorder). However, it is increasingly  
96 acknowledged that psychopathology is expressed dimensionally, representing a quantitative as  
97 well as qualitative deviations from mental health [8, 14-19]. In addition, it is increasingly  
98 accepted that mental disorders do not emerge fully formed in adulthood but evolve gradually,  
99 often manifesting for the first time already in adolescence [20, 21].

100  
101 A model that was designed to capture this continuity of both severity and time is the clinical  
102 staging model [22, 23]. This model describes psychopathology as ranging, through subsequent  
103 but qualitatively different stages, from increased risk of mental illness at the lowest level through  
104 progressive stages of severity, resulting in separable but overlapping syndromes at the highest

1  
2  
3 105 levels [24, 25]. Stage 0 represents individuals at increased risk without symptoms; Stage 1a  
4  
5 106 represents ‘help-seeking’ individuals with mild, non-specific symptoms; Stage 1b represents  
6  
7  
8 107 individuals with an ‘attenuated syndrome’, with moderate but subthreshold symptoms and  
9  
10 108 moderate functional decline; Stage 2 holds individuals with a first episode of a clinical,  
11  
12 109 ‘discrete’, disorder; Stage 3 holds individuals with persistent or recurrent illness [13, 22, 23] and  
13  
14 110 Stage 4 represents individuals with chronic illness. This clinical staging model further  
15  
16  
17 111 hypothesizes that psychopathological expression is more multi-dimensional, non-specific and  
18  
19  
20 112 more susceptible to intervention in early stages and becomes more crystallized, disorder specific  
21  
22 113 and treatment-resistant in later stages [25]. This model offers a theoretical representation that  
23  
24 114 seems to fit better to the true nature and development of psychopathology [9-11, 26], and hence  
25  
26  
27 115 may improve diagnostic accuracy. It has been developed most extensively in the context of  
28  
29 116 psychosis [23, 25, 27], but needs further empirical validation. Longitudinal studies assessing  
30  
31 117 predictive validity of the model have mostly concentrated around the transition from stage 1b  
32  
33 118 (ultra-high risk) to stage 2 (first psychotic episode), and found 3-year transition rates of 36%  
34  
35  
36 119 [28]. In addition, some biological and cognitive measures seem to be more abnormal in more  
37  
38  
39 120 severe stages, and these measures seem to change in patients who progress in stage [29, 30].  
40  
41 121 Finally, some treatments seem more effective for individuals in early stages [30]. Taken together,  
42  
43 122 these studies provide at least some support for the clinical staging model of psychosis. However,  
44  
45  
46 123 many questions still remain, e.g. about what drives progression through subsequent stages and  
47  
48 124 how the thresholds between the stages should be defined exactly.

49 125  
50  
51  
52  
53 126 The expression and development of early psychotic symptoms are highly variable [31-34] and  
54  
55 127 difficult to predict [28, 35]. One reason for this is that many studies so far have focused on early  
56  
57  
58  
59  
60



1  
2  
3 128 psychotic symptoms as specific predictors of later schizophrenia. However, this approach may be  
4  
5  
6 129 too narrow [25, 33, 36] because early psychotic symptoms are often transitory [37-39], also  
7  
8 130 occur in the context of [6, 7, 40-42] and predict other mental disorders [28, 37, 43, 44], and vice  
9  
10 131 versa [45-47]. High levels of comorbidity [48] and overlap of risk factors [49-52] also challenge  
11  
12 132 the assumed independence of psychosis from other symptom domains. In addition, the  
13  
14 133 information that is used to predict course and outcome is often based on cross-sectional  
15  
16  
17 134 assessment of symptoms and comparisons are often made at the group level. However,  
18  
19  
20 135 symptoms can vary substantially over time, both over short (i.e. days) and long intervals  
21  
22 136 (months, years), within one individual, and can also cross diagnostic borders [53]. This means  
23  
24 137 that the clinical picture can change, particularly in the early phase of a disorder [25]. These  
25  
26  
27 138 characteristics of psychopathology suggest that the 'static' model prediction may not be fit for  
28  
29 139 the purpose. This is reflected in the modest accuracy and replicability of static prediction models  
30  
31  
32 140 in the psychosis prediction field [54-56].  
33

34 141  
35  
36 142 The above-mentioned challenges may be overcome by taking a different approach towards the  
37  
38 143 conceptualization of psychopathology, its measurement and the way we model it. By taking a  
39  
40 144 more transdiagnostic approach, incorporating symptoms and experiences from multiple  
41  
42  
43 145 (psychotic and non-psychotic) domains, the narrow focus on the sole dimension of psychosis can  
44  
45  
46 146 be broadened. Furthermore, by modelling individual patterns of symptom patterns over time, a  
47  
48 147 more developmental as well as a more personalized approach can be taken that, in addition,  
49  
50 148 builds on a more detailed inventory of symptomatology compared to baseline (cross-sectional)  
51  
52 149 assessment scores. Finally, modelling the interconnectivity between symptoms by mapping  
53  
54  
55 150 individual symptom networks and patterns of co-occurrence in and over time could provide us  
56  
57  
58  
59  
60

1  
2  
3 151 with a better idea of how psychopathology develops and may give us clues on what processes  
4  
5  
6 152 may drive progression through subsequent clinical stages [57, 58].  
7

8 153

9  
10 154 *A network approach to psychopathology*

11  
12 155 A focus on dynamic symptom networks requires an innovative approach to psychopathology.

13 156 One of the currently promising alternative approaches comes from network theory. From this

14  
15 157 network perspective, psychopathology, at a phenomenological level, is hypothesized to result

16  
17 158 from interactions between symptoms [11, 59, 60]. Mental disorders are thus represented by sets

18  
19 159 of symptoms, connected in networks by causal relations [11, 59] (see also Figure 1). These

20  
21 160 networks are dynamic and capture reciprocal influences between symptoms over time (e.g.,

22  
23 161 feedback loops). Importantly, symptoms are acknowledged as causal factors in

24  
25 162 psychopathological development: one symptom (e.g., anxiety) can cause another (e.g., paranoia).

26  
27 163 This is in sharp contrast with current dominant models that represent symptoms as independent

28  
29 164 indicators of underlying, latent constructs (e.g., schizophrenia). As stress is important in the

30  
31 165 development of psychosis [61, 62], the sensitivity of symptom networks to risk-enhancing

32  
33 166 (trauma) and risk-reducing (coping, social support) factors [63, 64] also needs attention. The

34  
35 167 network approach has been successfully applied in other fields [65, 66], but is relatively novel in

36  
37 168 psychiatry, where it has been investigated mainly in common mental disorders [67], but not

38  
39 169 psychosis.  
40

41 170

42  
43 171 *Aims and hypotheses*

44  
45 172 With the Mapping Individual Routes of Risk and Resilience (Mirrr) study, we aim to

46  
47 173 investigate the hypothesis of dynamic symptom networks as the basis of psychopathology in  
48  
49  
50  
51  
52  
53  
54  
55  
56  
57  
58  
59  
60

1  
2  
3 174 general and psychosis in particular. The key hypothesis to be tested centres on the question  
4  
5  
6 175 whether individual networks of a broad scope of transdiagnostic symptoms can predict course  
7  
8 176 and outcome of early psychopathology in young individuals at increased risk for psychosis and  
9  
10 177 other severe mental illness. Furthermore, we aim to investigate the additional hypothesis of  
11  
12 178 symptom networks as markers/indicators of progression of illness through successive clinical  
13  
14  
15 179 stages. Taking a broader, multidimensional and process-oriented approach, we will examine how  
16  
17 180 symptoms of multiple domains influence each other over time and across diagnostic boundaries,  
18  
19  
20 181 in interaction with environmental factors. More specifically, we hypothesize that different  
21  
22 182 clinical stages will be characterized by different symptom networks. In addition, we expect that  
23  
24 183 characteristics of these networks can predict progression through clinical stages. We will explore  
25  
26  
27 184 the predictive potential of several characteristics, such as the strength and directionality of  
28  
29 185 symptom connections (see Figure 1) and centrality indices (information about the position of a  
30  
31 186 symptom in the network). Finally, we will evaluate the predictive potential of these  
32  
33  
34 187 characteristics against (more) static assessments of symptom severity.  
35  
36  
37 188

38  
39 189 The Mirorr study is unique in its design and in its attempt to (i) bring together a network  
40  
41 190 approach to psychopathology and the clinical staging model, (ii) take a broader perspective on  
42  
43 191 mental illness by (a) taking a transdiagnostic approach towards symptomatology and (b) defining  
44  
45  
46 192 outcome in more broadly in the context of clinical staging (incorporating both clinical and  
47  
48 193 functional outcomes), and (iii) modelling individual symptom networks over time by using time-  
49  
50 194 series data, enabling us to model more personalized pathways of psychopathological  
51  
52  
53 195 development.  
54

55 196  
56  
57  
58  
59  
60

197

198

199 *Outcome measures*

200 Traditionally, research in the field of psychosis focuses mostly on transition from clinical high  
201 risk to a first episode of psychosis [68]. However, there is growing awareness that this may be  
202 arbitrary, especially in the context of a staging model that acknowledges expression of illness  
203 along a much broader severity spectrum. In addition, functional outcome is becoming more and  
204 more an important outcome of interest, as it has been shown that both clinical and functional  
205 outcome are important but not always congruent [69-71]. Working from a clinical staging  
206 perspective, important outcomes to investigate include therefore progression through clinical  
207 stages, functioning and need for care.

208

209 Please insert Figure 1 here.

210

**211 Methods and analysis***212 Study design*

213 This study combines idiographic (within-person) and nomothetic (between-person) observational  
214 study designs. The nomothetic aspect of the study is captured by questionnaire and interview  
215 data at baseline and three yearly follow measurement waves. Among other things,  
216 symptomatology, functioning and need for care will be assessed (outcome measures), as well as  
217 risk and protective factors. The idiographic aspect is captured by diary assessments at baseline  
218 and the first follow-up wave. During the diary periods, participants will complete a diary  
219 questionnaire daily for a period of 90 days on their smartphone, regarding symptoms, emotions,

1  
2  
3 220 functioning and stress. These diary data are used to map individual symptom networks. For the  
4  
5  
6 221 second diary period, participants can also opt to keep continuing the questionnaire follow-ups,  
7  
8 222 but not have a second diary period. A flowchart of the study is presented in Figure 2.  
9

10 223

11  
12  
13 224 Please insert Figure 2 here.

14  
15 225

16  
17 226 *Study population*

18  
19  
20 227 The total sample comprises of 175 individuals of 18-35 years, whereof 100 will enter the main  
21  
22 228 study (i.e. the daily diary study and the yearly follow-ups). For the main study, there will be four  
23  
24 229 subsamples, all n=25 (Figure 3) with each subgroup having an increasingly more severe  
25  
26  
27 230 psychopathological level and thus representing subsequent clinical stages. For subsample 1  
28  
29 231 (lowest level of psychopathology and thus lowest clinical stage), 100 individuals will be  
30  
31 232 randomly selected from the general population in the North of the Netherlands and administered  
32  
33 233 the Community Assessment of Psychic Experiences (CAPE) [72]. Of all the respondents who  
34  
35  
36 234 meet the inclusion and exclusion criteria of the study, the highest scoring quartile will be  
37  
38  
39 235 included in the main study. For subsamples 2-4, individuals will be recruited from mental health  
40  
41 236 care institutions in the four Northern provinces in The Netherlands. For all individuals who are  
42  
43 237 referred to mental health care, psychotic symptoms are routinely screened by means of, among  
44  
45  
46 238 other things, the Prodromal Questionnaire (PQ) [73]. If the score on the PQ is 6 or higher, the  
47  
48 239 Comprehensive Assessment of At Risk Mental State (CAARMS) [74] is administered as well.  
49  
50 240 With these scores it is determined for which subsample (2-4, explained below) eligible subjects  
51  
52  
53 241 will be recruited, where a higher subsample indicates higher levels of psychopathology.  
54

55 242  
56  
57  
58  
59  
60

1  
2  
3 243 Please insert Figure 3 here.  
4  
5  
6 244  
7

8 245 In order to be eligible to participate in the study, subjects must meet all of the following criteria:  
9

10 246 1) age between 18 and 35 years, 2) read and speak Dutch fluently, 3) capable of following the  
11

12 247 research procedures, 4) provide Informed Consent. In addition, participants of subsample 1  
13

14 248 should *not* be in clinical care for mental health at the moment of screening. In contrast,  
15

16 249 participants of subsample 2-4 *should* currently be in clinical care for mental health. In addition,  
17

18 250 participants of subsample 2 should have mild, non-psychotic psychopathology, as evidenced by a  
19

20 251 score below 6 on the PQ, participants of subsample 3 should have mild psychopathology  
21

22 252 including subclinical psychotic symptoms, as evidenced by a score of or above 6 on the PQ, but  
23

24 253 are not at ultra-high risk (UHR) for psychosis, as indexed by the CAARMS. Finally, participants  
25

26 254 of subsample 4 should be at UHR for psychosis, as indexed by the CAARMS. Exclusions criteria  
27

28 255 are: 1) a history of or current psychotic episode, according to the Diagnostic and Statistical  
29

30 256 manual of Mental Disorders-IV (DSM-IV) criteria; 2) significant hearing or visual problems  
31

32 257 impairments; 3) pregnancy, as stated on a general health questionnaire.  
33

34 258  
35  
36  
37  
38  
39

40  
41 259 *Procedure*  
42

43 260 Recruitment  
44

45  
46 261 To recruit subsample 1, the study will be announced at several university sites, public places in  
47

48 262 Groningen, and social media (start recruitment: September 2015). Interested individuals can  
49

50 263 contact the researchers by phone or e-mail for more information. They will then be sent an  
51

52 264 information letter, flyer, informed consent form and the initial screenings questionnaires. After  
53

54 265 receiving the completed screening questionnaires and informed consent forms, the 25 (out of  
55  
56  
57  
58  
59  
60

1  
2  
3 266 100) individuals with the highest CAPE scores will be invited to participate in the main study  
4  
5  
6 267 (first inclusion: December 2015). For subsample 2-4, individuals will be recruited from mental  
7  
8 268 health care institutions in four northern Dutch provinces (first inclusion: April 2016). To which  
9  
10 269 subsample they will be recruited is determined using the instruments described under study  
11  
12 270 population. For these sites where patients give their consent for receiving information about  
13  
14 271 ongoing research projects, a package containing detailed information on the study (information  
15  
16 272 letter and flyer), along with screening questionnaires and an informed consent form will be sent  
17  
18 273 to potential participants. Interested individuals can fill out and return requested forms (including  
19  
20 274 informed consent form). After receiving the requested forms, an individual's therapist will be  
21  
22 275 consulted about several exclusion criteria. For these sites where participants do not give consent  
23  
24 276 in advance, the individual's clinical worker will be provided a package containing detailed  
25  
26 277 information on the study (information letter and flyer), along with screening questionnaires and  
27  
28 278 an informed consent form. The clinical worker will pre-screen his/her client on the exclusion  
29  
30 279 criteria of the study and hand over the package if he/she fits the profile of the study. Study  
31  
32 280 participants can continue their therapy and medical treatment as usual; they will be asked to  
33  
34 281 register any changes in medication or treatment during the daily ambulatory assessments.  
35  
36  
37  
38  
39  
40  
41  
42

#### 43 283 Screening

44  
45 284 The information package that interested individuals receive contains an information letter, two  
46  
47 285 screening questionnaires and an informed consent form. All potential participants can ask  
48  
49 286 questions before completing informed consent form or the screening questionnaires. As  
50  
51 287 mentioned in the information letter, in case subjects should decide to participate, they should fill  
52  
53 288 out and send back these questionnaires and the informed consent form. This consent form covers  
54  
55  
56  
57  
58  
59  
60

1  
2  
3 289 the baseline ambulatory assessment period and the yearly follow-up assessments (three in total).  
4  
5 290 On this consent form permission will be asked to re-invite subjects for the follow-up ambulatory  
6  
7  
8 291 assessment period, for which they have to complete a separate consent form (one year later).  
9  
10 292 Also, permission will be asked to use data from the psychiatric case register of the North of the  
11  
12 293 Netherlands. The first screening questionnaire is a screening questionnaire on general health,  
13  
14 294 containing questions on demographics, health complaints (such as visual or hearing  
15  
16 295 impairments), pregnancy, drug and alcohol use, medication use, and mental health problems.  
17  
18 296 This will be used to screen on exclusion criteria. The second screening questionnaire is the  
19  
20 297 CAPE. This instrument is used to screen individuals recruited from the general population  
21  
22 298 (subsample 1) on psychotic experiences but will be administered to all participants to enable  
23  
24 299 group comparisons on the level of subclinical psychotic experiences. The highest scoring quartile  
25  
26 300 (n=25) will subsequently be included in the main study. Subjects will have one week to decide  
27  
28 301 about participation.  
29  
30  
31  
32  
33

34 302  
35  
36 303 Baseline interview and ambulatory assessments (year one)  
37  
38 304 If subjects are eligible to enter the study and agree to participate, they will be invited (by  
39  
40 305 telephone or e-mail) for an introduction interview at the University Medical Centre Groningen. A  
41  
42 306 few days before the interview, self-report questionnaires will be administered via email (see data  
43  
44 307 management for more information). The questionnaires assess symptomatology, functioning,  
45  
46 308 clinical stage, and factors of risk and resilience. During the interview, the study will be explained  
47  
48 309 to them in detail and a diagnostic psychiatric interview will be held. If in an exceptional case the  
49  
50 310 participant does not possess a smartphone, this will be provided to the participant during the  
51  
52 311 study period. An appointment for an end-of-study interview will be planned. Also, the  
53  
54  
55  
56  
57  
58  
59  
60



1  
2  
3 312 participants will be asked to designate suitable moments at which the researcher can call him/her  
4  
5  
6 313 to inquire on the progression of the study and to help with any problems the participant may  
7  
8 314 experience.

9  
10 315  
11  
12 316 The participants then start completing the electronic daily diary for three months. Every evening,  
13  
14  
15 317 they receive a text message with a link which directs them to a web-based diary questionnaire in  
16  
17 318 a secure environment. Measurements are always in the evening, asking about the past day; exact  
18  
19 319 times can vary per person (but not per day) and are fixed according to the participant's wishes.  
20  
21 320 However, *all* participants have 24 hours between each measurement point. For example,  
22  
23 321 participant A will always receive her text message at 22.00 and participant B always at 21.15. A  
24  
25 322 window of one and a half hour will be allowed to fill in the diary, and reminder messages will be  
26  
27 323 send every half hour. Short questions will be presented on sequential screens, which are mainly  
28  
29 324 answered using visual analogue scales. During the research period, participants are also provided  
30  
31 325 a paper log, in which they can note any unusual events, start of or changes in medication use and  
32  
33 326 problems they encounter with the research procedures. The researchers will telephone the  
34  
35 327 participants six times during the study period (every other week), to motivate the participant,  
36  
37 328 answer questions about the study procedures and provide technical help. They will also be  
38  
39 329 available by telephone and e-mail if participants need help at other moments.  
40  
41  
42  
43  
44  
45  
46  
47

48 331 During the end-of-ambulatory-assessment (3 months after baseline) interview participants will  
49  
50 332 fill out an online questionnaire battery once more, and report on any changes in medical  
51  
52 333 treatment. Furthermore, they will also be asked to comment on the data collection and the study  
53  
54  
55 334 in general. We will use this information to check whether the study affected their thoughts and  
56  
57  
58  
59  
60

1  
2  
3 335 behaviours in any way, whether there had been special events that might have affected the data  
4  
5  
6 336 collected.

7  
8 337

9  
10 338 Follow-up assessments

11  
12 339 One, two and three years after baseline, all participants will receive questionnaires about

13 340 functioning and clinical stage via email. The participants will be able to fill these in at home.

14  
15 341 Shortly after filling in the questionnaires, participants will be interviewed by telephone or face-

16  
17 342 to-face at one of our research facilities, depending on their preferences, to establish the

18  
19 343 presence/absence of psychiatric disorders with a diagnostic interview. In addition, to distinguish

20  
21 344 individuals in clinical stage 1a from individuals in clinical stage 1b (all individuals with a score

22  
23 345 of 6 or higher on the PQ-16), data from the CAARMS interview is needed. Participants will be

24  
25 346 reminded about the follow-up assessments a few weeks before the actual follow-up by means of

26  
27 347 an information letter.

28  
29 348

30  
31 349 Follow-up ambulatory assessment period (year two)

32  
33 350 In the aforementioned information letter, participants will also read information about a second

34  
35 351 ambulatory assessment period that they can enrol in. If they are interested, they are invited for

36  
37 352 another introduction interview (given that they still fulfil the in- and exclusion criteria as

38  
39 353 evidenced by their answers to an online version of a general health questionnaire). This interview

40  
41 354 is similar to the introduction interview at baseline (i.e., questionnaire battery and procedures). An

42  
43 355 exception is that questionnaires about symptomatology, functioning and clinical stage will not be

44  
45 356 administered, because they have been covered already by the usual follow-up assessments.

46  
47 357 Participants then start their second three-month period of ambulatory assessments one year after

1  
2  
3 358 the first diary period. The end-of-ambulatory-assessment interview will take place, again with  
4  
5  
6 359 similar questionnaires to the one held at baseline.  
7

8 360

9  
10 361 *Instruments*

11  
12 362 A complete overview of the instruments used throughout the study is presented in Table 1.  
13

14 363

15  
16  
17 364 Please insert Table 1 here.  
18

19  
20 365

21  
22 366 *Diary measures*

23  
24 367 The items assessed in the daily questionnaires will be used to model individual networks of  
25  
26  
27 368 symptoms, experiences and emotions. Items included in the dairy questionnaires were chosen  
28  
29 369 from a transdiagnostic perspective and cover a broad range of feelings and experiences that are  
30  
31 370 characteristic for (subclinical) psychotic experiences, depression, anxiety, mania, obsessive  
32  
33 371 compulsive behaviour and anger. These disorders are known for the co-occurrence of psychotic  
34  
35 372 symptoms [6, 7] and comorbidity [48]. For the complete item list, see Additional file 1, Table  
36  
37 373 S1.  
38

39  
40 374

41  
42  
43 375 Positive psychotic experiences can be divided into five categories, namely paranoia, delusions,  
44  
45 376 hallucinations, megalomania, and paranormal beliefs [75]. Because paranormal beliefs are often  
46  
47 377 stable over time, we will include items covering the first four categories. Negative symptoms of  
48  
49 378 psychosis will be covered by items about flattened affect (e.g., anhedonia, low motivation, social  
50  
51 379 withdrawal), which resemble closely the negative symptoms of the CAPE. Most items are  
52  
53 380 adopted from previous ESM studies [76-78], and all items are adapted for daily use.  
54  
55  
56  
57  
58  
59  
60

1  
2  
3 381  
4  
5  
6 382 Symptoms of depression will be measured using items that correspond closely to the patient  
7  
8 383 health questionnaire (PHQ-9) [79], a self-administered questionnaire for screening and  
9  
10 384 measuring the severity of depression. Anxiety symptoms will be measured using items that  
11  
12 385 correspond closely to the Hospital Anxiety and Depression Scales – Anxiety (HADS-A) [80].  
13  
14  
15 386 Mania, obsessive compulsive behaviour and anger are measured with items that correspond  
16  
17 387 closely to items from the DSM-V – screener for the corresponding clinical disorders [81].  
18  
19

20 388  
21  
22 389 Positive and negative mood states over the past day will be measured with 12 items from the  
23  
24 390 circumplex model of affect [82, 83]. Momentary affect will be measured with an item for  
25  
26  
27 391 valence (“I feel unpleasant – pleasant”) and activation (“I feel aroused/activated – quiet/still”) at  
28  
29 392 the beginning of each diary entry. Other items cover sleep, daily activities and situations that  
30  
31 393 may influence psychiatric symptoms, such as positive and negative events, social interactions,  
32  
33  
34 394 coping behaviour, physical activity and drug use.  
35

36 395  
37  
38  
39 396 Follow-up measures  
40  
41 397 Important outcomes that are linked to the above described network characteristics are  
42  
43 398 (progression through) clinical stages, functioning and need for care. Progression through clinical  
44  
45  
46 399 stages will be assessed with the PQ-16, the CAPE and the CAARMS, the Symptom Check List  
47  
48 400 (SCL-90) [84] and the Schedules for Clinical Assessment in Neuropsychiatry, short version  
49  
50 401 (mini-SCAN) [85]. Social functioning will be assessed using the Groningse Vragenlijst voor  
51  
52 402 Sociaal Gedrag (GVSG-45) [86] and the Flourishing Scale [87]. Need for care will be assessed  
53  
54  
55 403 using self-reported information on care use. Additionally, need for care will be assessed by  
56  
57  
58  
59  
60

1  
2  
3 404 linking data from the psychiatric case registry to our sample when approved by the participant  
4  
5 405 (as stated on the informed consent form). Specifically, the frequency and type of care use  
6  
7  
8 406 throughout the study period will be obtained.  
9

10 407

11  
12  
13 408 Assessments pre- and post-daily diary period(s)

14  
15 409 Before and after the daily diary assessments, several questionnaires will be administered to

16  
17 410 assess symptomatology, functioning and several risk and resilience factors. Psychotic symptoms

18  
19 411 will be assessed with the CAPE; depression and anxiety symptoms with the Depression Anxiety

20  
21 412 and Stress Scale (DASS) [88]; mania symptoms with the Altman Self-Rating Mania Scale

22  
23 413 (ASRM-NL) [89], social support with the Social Support List (SLL) [90]; resilience with the

24  
25 414 Brief Resilience Scale (BRS) [91] and coping style with the Utrechtse Coping Lijst (UCL) [92].

26  
27 415 Furthermore, physical activity levels will be tracked with an accelerometer, the ActiCal®

28  
29 416 (Respironics, Bend, OR, USA), during the first two weeks of the second diary period. Output of

30  
31 417 this instrument will be presented as Energy Expenditure and Metabolic Equivalent of Task. The

32  
33 418 physical activity measurements are added to serve as a pilot study, and are not obligatory.  
34  
35  
36  
37  
38

39 419

40  
41 420 At baseline, sleep habits will be assessed with the Munich Chronotype Questionnaire (MCTQ)

42  
43 421 [93] to optimize the diary assessment process. Also, potential confounders such as smoking,

44  
45 422 alcohol/drug consumption, socio-economic status, Body Mass Index will be registered by means

46  
47 423 of a general health questionnaire. In addition, stressful life events will be assessed, using the list

48  
49 424 of threatening experiences [94]. Finally, pertaining to subgroup 4 only, social cognition will be

50  
51 425 assessed using the Faux Pas Task [95] and bonding with parents will be assessed with the  
52  
53  
54  
55  
56  
57  
58  
59  
60

1  
2  
3 426 Inventory of Parent and Peer Attachment (IPPA) [96, 97]. These factors may be of importance in  
4  
5  
6 427 determining a transition from an UHR status to psychosis.  
7

8 428

9  
10 429

11  
12  
13 430 *Data analysis plan*

14  
15 431 To map individual symptom networks of day-to-day symptom levels, multivariate time-series

16  
17 432 analysis will be employed on each individual's time series data. Specifically, vector

18  
19  
20 433 autoregression (VAR) models will be applied [98]. These models are particularly suited for

21  
22 434 investigating the temporal dynamics between two or more variables. The resulting associations

23  
24 435 between symptoms will subsequently be presented as networks, and network parameters will be

25  
26 436 estimated. These include (but are not limited to) the strength and directionality of symptom

27  
28  
29 437 connections (see Figure 1) and centrality indices (information about the position of a symptom in

30  
31 438 the network). Next, symptom networks will be compared (i) across different subgroups of

32  
33  
34 439 severity and (ii) when the second diary period is completed, within each individual.  
35

36 440

37  
38  
39 441 In addition, a data-driven approach will be used to identify individuals with similar symptom

40  
41 442 network characteristics by (1) qualitative network comparison, (2) quantitative comparison of

42  
43 443 centrality indices [99, 100], and (3) longitudinal mixture models [101]. These subgroups will

44  
45 444 then be compared on their levels of symptomatology and functioning and on course of

46  
47 445 symptomatology over time. Furthermore, the predictive value of the network parameters will be

48  
49 446 compared to the predictive value of usual predictors of illness course, namely cross-sectionally

50  
51 447 assessed level of (subclinical) psychotic pathology. Specifically, sensitivity and specificity of

52  
53 448 these network characteristics can be compared to sensitivity and specificity of baseline  
54  
55  
56  
57  
58  
59  
60

1  
2  
3 449 subclinical levels of psychotic symptoms (CAPE) and general psychopathology (SCL-90).  
4  
5  
6 450 Finally, risk and resilience factors, such as stressful events, social interactions, physical activity,  
7  
8 451 coping and resilience, may also influence symptoms and, importantly, their dynamics in the  
9  
10 452 network, but may do so differently in individuals with good or poor clinical and functional  
11  
12 453 outcome. The role of these factors will be addressed by including them in individual network  
13  
14 454 analyses to examine their direct and indirect impact on symptomatology and each other.  
15  
16  
17 455 To control for potential confounding effects of demographic factors, such as sex, age and social  
18  
19 456 economic status, these variables will be added as covariates to all group level analyses.  
20  
21

22 457  
23  
24 458 Based on previous work [102, 103], we expect no more than 10% missing data. Missing values  
25  
26 459 will be imputed with expectation-maximization imputation, following special recommendations  
27  
28 460 for time-series datasets [104]. A (two-sided) p-value of 0.05 is applied for statistical testing.  
29  
30  
31

32 461

### 33 34 462 *Sample size and power*

35  
36 463 Within-person analyses: constructing individual symptom networks

37  
38 464 Exact sample size calculations are not possible in studies using VAR, as it is typically unclear in  
39  
40 465 such studies what effect size can be expected. This is because the direction of causality and the  
41  
42 466 number of lagged influences in the system under investigation are usually unknown and  
43  
44 467 bidirectional and feedback effects can be present as well [98]. However, as previous work from  
45  
46 468 our group [102, 105, 106] and work of others [107] suggests, 60-90 measurements suffice to  
47  
48 469 reliably identify reciprocal associations between multiple variables.  
49  
50

51 470

52  
53  
54  
55 471 Between-person analyses: associating symptom networks to clinical stage  
56  
57  
58  
59  
60

1  
2  
3 472 In the between-person analyses, the data have a multilevel structure. Therefore, the unilevel  
4  
5 473 equivalent of the multilevel sample size [108] was taken to calculate the power, assuming a  
6  
7  
8 474 conservative intraclass-correlation of 0.8. Assuming differences of 0.05 in mean coefficients (s.d.  
9  
10 475 = 0.07) between the different groups [109], the proposed study has a power of 0.8 (to detect  
11  
12 476 significant differences at  $p < 0.05$ ). Subgroups of  $N = 25$  are large enough to take into account  
13  
14 477 effects of several covariates [110].  
15  
16  
17  
18 478

### 19 20 479 **Ethics and dissemination**

21  
22 480 This study has been approved by the medical ethical committee of the University Medical Centre  
23  
24 481 Groningen (UMCG), Groningen, The Netherlands (registration number MEC no. 2015/159,  
25  
26 482 ABR no. NL52974.042.15). The study will be conducted in accordance with the Helsinki  
27  
28 483 Declaration, meaning that participation is voluntary and written informed consent will be  
29  
30 484 obtained. Several protocols have been developed for situations where clinical care may be  
31  
32 485 warranted, e.g. in case of disclosure of suicidal thoughts, or in case of UHR status in one of the  
33  
34 486 lower risk groups.  
35  
36  
37  
38  
39 487

40  
41 488 An online outcome monitoring system, called RoQua ([www.roqua.nl](http://www.roqua.nl)) is used for data collection  
42  
43 489 and data storage, to which only designated researchers have access via the use of passwords  
44  
45 490 combined with google authentication. Participants have access to the questionnaires via a link in  
46  
47 491 their e-mail inbox. The safety of this system is guaranteed by the UMCG (an ‘In Control  
48  
49 492 Statement’ is available on request). Data management is also organized according to UMCG  
50  
51 493 standards, including a strict separation of identifying patient data (name, date of birth etc.) and  
52  
53 494 the anonymous datasets available for the researchers.  
54  
55  
56  
57  
58  
59  
60



1  
2  
3 495  
4  
5  
6 496 Data gathering was not completed when this manuscript was submitted. After the study has  
7  
8 497 ended and the study's main results have been published, the data obtained by this study will  
9  
10 498 become available on reasonable request. Requests should be sent to [j.t.w.wigman@umcg.nl](mailto:j.t.w.wigman@umcg.nl) with  
11  
12 499 the topic name MIRORR data. The results of the study will be published in (inter)national peer-  
13  
14  
15 500 reviewed journals, presented at research, clinical and general public conferences.  
16  
17  
18 501

## 20 502 **Discussion**

21  
22 503 Current diagnostic systems are increasingly criticized by mental health professionals, researchers  
23  
24 504 and users of mental health care [9, 12, 26, 111]. Conceptualization of psychopathology in terms  
25  
26  
27 505 of (i) clinical staging (at macro level) and (ii) dynamic, individual symptom networks (at a more  
28  
29 506 micro level), which is the purpose of this study, represents a promising avenue to tackle both  
30  
31 507 scientific and clinical problems. From a scientific perspective, improving our understanding of  
32  
33  
34 508 the factors driving the development of psychopathology by investigating how symptoms  
35  
36 509 influence each other will enhance our ability to identify valid phenotypes to predict onset of  
37  
38  
39 510 (psychotic) mental disorders and to link with other relevant information (e.g., genetic or  
40  
41 511 endophenotypic variation). From a clinical perspective, a better understanding of why psychotic  
42  
43 512 symptoms can lead to a need for care in some, but resolve spontaneously in others, will help  
44  
45  
46 513 mental health professionals to adequately recognize the early needs of individuals who are likely  
47  
48 514 to develop mental illness or functional impairments. This is important because interventions are  
49  
50 515 both more effective and less invasive when applied early in the course of illness [112]. In more  
51  
52  
53 516 progressive clinical stages, deeper knowledge of the dynamic ways symptoms impact on each  
54  
55 517 other will help to differentiate between those likely to recover or to deteriorate and between  
56  
57  
58  
59  
60

1  
2  
3 518 those likely to be responsive or resistant to treatment. Using symptom networks will improve the  
4  
5  
6 519 application of individually tailored, person-based interventions, adapted to one's current clinical  
7  
8 520 stage and symptomatology, as different stages require different types of intervention. Since  
9  
10 521 personalised interventions better fit individual needs, they will result in enhanced treatment  
11  
12 522 response [113], reducing the costs of mental disorders at both personal and societal level. Thus,  
13  
14 523 the use of symptom networks will assist in improving and fine-tuning dynamic models of  
15  
16 524 psychopathology, which will stimulate both clinical (in terms of both diagnostics and  
17  
18 525 intervention) and scientific progress.  
19  
20  
21  
22  
23  
24  
25  
26

## 27 528 **Acknowledgements**

28  
29 529 We would like to thank the ROQUA team for their collaboration and for building and  
30  
31 530 maintaining the smartphone web-based (diary) questionnaires. We are grateful to Laura  
32  
33 531 Steenhuis, Roos Willemsen, Marike Fowler, Cornelia Glasbergen, Marijke Muller, Eliese van  
34  
35 532 Deelen, Marion van Dijk, Sieberen Veenstra, Marietta Khachatryan and Thirza Osinga for their  
36  
37 533 contributions to the field work and data management. We thank Ernst Wit and Elske Bos for  
38  
39 534 their conceptual and methodological input. Finally, we thank Rob Wanders and Ando Emerencia  
40  
41 535 for their help with automating the personalized feedback procedure.  
42  
43  
44  
45  
46  
47  
48

## 49 537 **References**

- 50  
51  
52 538 1 van Os J, Kapur S. Schizophrenia, *The Lancet* 2009;374:635-45.  
53  
54 539 2 Eaton WW, Martins SS, Nestadt G, et al. The burden of mental disorders, *Epidemiol Rev*  
55 540 2008;30:1-14.  
56  
57  
58  
59  
60

- 1  
2  
3 541 3 McCrone PR, Dhanasiri S, Patel A, et al. Paying the price: the cost of mental health care in  
4 542 England to 2026: King's Fund 2008.
- 5  
6  
7 543 4 Nationaal Kompas Volksgezondheid. Psychisch functioneren: Zijn er verschillen tussen  
8 544 Nederland en andere landen? Preventie gericht op psychisch functioneren van jeugd.
- 9  
10  
11 545 5 Van Os J, Linscott RJ, Myin-Germeys I, et al. A systematic review and meta-analysis of the  
12 546 psychosis continuum: evidence for a psychosis proneness–persistence–impairment model of  
13 547 psychotic disorder, *Psychol Med* 2009;39:179-95.
- 14  
15 548 6 Wigman J, van Nierop M, Vollebergh WA, et al. Evidence that psychotic symptoms are  
16 549 prevalent in disorders of anxiety and depression, impacting on illness onset, risk, and severity--  
17 550 implications for diagnosis and ultra-high risk research, *Schizophr Bull* 2012;38:247-57.
- 18  
19  
20 551 7 Wigman J, van Os J, Abidi L, et al. Subclinical psychotic experiences and bipolar spectrum  
21 552 features in depression: association with outcome of psychotherapy, *Psychol Med* 2014;44:325-  
22 553 36.
- 23  
24  
25 554 8 Kendell R, Jablensky A. Distinguishing between the validity and utility of psychiatric  
26 555 diagnoses, *Am J Psychiatry* 2003.
- 27  
28 556 9 Widiger TA. A dimensional model of psychopathology, *Psychopathology* 2005;38:211-4.
- 29  
30  
31 557 10 Widiger TA, Samuel DB. Diagnostic categories or dimensions? A question for the Diagnostic  
32 558 and statistical manual of mental disorders--, *J Abnorm Psychol* 2005;114:494.
- 33  
34 559 11 Kendler KS, Zachar P, Craver C. What kinds of things are psychiatric disorders? *Psychol Med*  
35 560 2011;41:1143-50.
- 36  
37  
38 561 12 Kupfer DJ, First MB, Regier DA. A research agenda for DSM V: American Psychiatric Pub  
39 562 2008.
- 40  
41 563 13 Hickie IB, Scott J, McGorry PD. Clinical staging for mental disorders: a new development in  
42 564 diagnostic practice in mental health, *Med J Aust* 2013;198:461-2.
- 43  
44  
45 565 14 Strauss JS. Hallucinations and delusions as points on continua function: Rating scale  
46 566 evidence, *Arch Gen Psychiatry* 1969;21:581-6.
- 47  
48  
49 567 15 Haslam N, Holland E, Kuppens P. Categories versus dimensions in personality and  
50 568 psychopathology: a quantitative review of taxometric research, *Psychol Med* 2012;42:903-20.
- 51  
52 569 16 Kendler KS, Gardner Jr CO. Boundaries of major depression: an evaluation of DSM-IV  
53 570 criteria, *Am J Psychiatry* 1998.
- 54  
55  
56  
57  
58  
59  
60

- 1  
2  
3 571 17 Angst J, Gamma A, Benazzi F, et al. Toward a re-definition of subthreshold bipolarity:  
4 572 epidemiology and proposed criteria for bipolar-II, minor bipolar disorders and hypomania, *J*  
5 573 *Affect Disord* 2003;73:133-46.  
6  
7  
8 574 18 Carter RM, Wittchen H, Pfister H, et al. One-year prevalence of subthreshold and threshold  
9 575 DSM-IV generalized anxiety disorder in a nationally representative sample, *Depress Anxiety*  
10 576 2001;13:78-88.  
11  
12  
13 577 19 Krueger RF, Piasecki TM. Toward a dimensional and psychometrically-informed approach to  
14 578 conceptualizing psychopathology, *Behav Res Ther* 2002;40:485-99.  
15  
16  
17 579 20 Paus T, Keshavan M, Giedd JN. Why do many psychiatric disorders emerge during  
18 580 adolescence? *Nature Reviews Neuroscience* 2008;9:947-57.  
19  
20 581 21 Kessler RC, Berglund P, Demler O, et al. Lifetime prevalence and age-of-onset distributions  
21 582 of DSM-IV disorders in the National Comorbidity Survey Replication, *Arch Gen Psychiatry*  
22 583 2005;62:593-602.  
23  
24  
25 584 22 McGorry PD, Hickie IB, Yung AR, et al. Clinical staging of psychiatric disorders: a heuristic  
26 585 framework for choosing earlier, safer and more effective interventions, *Aust N Z J Psychiatry*  
27 586 2006;40:616-22.  
28  
29  
30 587 23 McGorry PD. Issues for DSM-V: clinical staging: a heuristic pathway to valid nosology and  
31 588 safer, more effective treatment in psychiatry, *Am J Psychiatry* 2007.  
32  
33  
34 589 24 Wigman JT, van Os J, Thiery E, et al. Psychiatric diagnosis revisited: towards a system of  
35 590 staging and profiling combining nomothetic and idiographic parameters of momentary mental  
36 591 states, *PLoS One* 2013;8:e59559.  
37  
38 592 25 McGorry P, van Os J. Redeeming diagnosis in psychiatry: timing versus specificity, *Lancet*  
39 593 2013;381:343-5.  
40  
41  
42 594 26 Hyman SE. The diagnosis of mental disorders: the problem of reification, *Annual review of*  
43 595 *clinical psychology* 2010;6:155-79.  
44  
45 596 27 McGorry PD, Killackey E, Yung AR. Early intervention in psychotic disorders: detection and  
46 597 treatment of the first episode and the critical early stages, *Med J Aust* 2007;187:S8-10.  
47  
48  
49 598 28 Fusar-Poli P, Bonoldi I, Yung AR, et al. Predicting psychosis: meta-analysis of transition  
50 599 outcomes in individuals at high clinical risk, *Arch Gen Psychiatry* 2012;69:220-9.  
51  
52  
53 600 29 McGorry P, Keshavan M, Goldstone S, et al. Biomarkers and clinical staging in psychiatry,  
54 601 *World Psychiatry* 2014;13:211-23.  
55  
56  
57  
58  
59  
60

- 1  
2  
3 602 30 Wood SJ, Yung AR, McGorry PD, et al. Neuroimaging and treatment evidence for clinical  
4 603 staging in psychotic disorders: from the at-risk mental state to chronic schizophrenia, *Biol*  
5 604 *Psychiatry* 2011;70:619-25.
- 6  
7  
8 605 31 Scott J, Leboyer M, Hickie I, et al. Clinical staging in psychiatry: a cross-cutting model of  
9 606 diagnosis with heuristic and practical value, *Br J Psychiatry* 2013;202:243-5.
- 10  
11  
12 607 32 Keshavan MS, DeLisi LE, Seidman LJ. Early and broadly defined psychosis risk mental  
13 608 states, *Schizophr Res* 2011;126:1-10.
- 14  
15  
16 609 33 Fusar-Poli P, Yung A, McGorry P, et al. Lessons learned from the psychosis high-risk state:  
17 610 towards a general staging model of prodromal intervention, *Psychol Med* 2014;44:17-24.
- 18  
19 611 34 Tandon R, Nasrallah HA, Keshavan MS. Schizophrenia, “just the facts” 4. Clinical features  
20 612 and conceptualization, *Schizophr Res* 2009;110:1-23.
- 21  
22  
23 613 35 Lin A, Nelson B, Yung A. ‘At-risk’ for psychosis research: where are we heading?  
24 614 *Epidemiology and psychiatric sciences* 2012;21:329-34.
- 25  
26 615 36 van Os J. The dynamics of subthreshold psychopathology: implications for diagnosis and  
27 616 treatment, *Am J Psychiatry* 2013.
- 28  
29  
30 617 37 Kaymaz N, Drukker M, Lieb R, et al. Do subthreshold psychotic experiences predict clinical  
31 618 outcomes in unselected non-help-seeking population-based samples? A systematic review and  
32 619 meta-analysis, enriched with new results, *Psychol Med* 2012;42:2239-53.
- 33  
34  
35 620 38 Velthorst E, Nieman D, Klaassen R, et al. Three-year course of clinical symptomatology in  
36 621 young people at ultra high risk for transition to psychosis, *Acta Psychiatr Scand* 2011;123:36-42.
- 37  
38  
39 622 39 Zammit S, Kounali D, Cannon M, et al. Psychotic experiences and psychotic disorders at age  
40 623 18 in relation to psychotic experiences at age 12 in a longitudinal population-based cohort study,  
41 624 *Am J Psychiatry* 2013.
- 42  
43  
44 625 40 Kelleher I, Keeley H, Corcoran P, et al. Clinicopathological significance of psychotic  
45 626 experiences in non-psychotic young people: evidence from four population-based studies, *Br J*  
46 627 *Psychiatry* 2012;201:26-32.
- 47  
48  
49 628 41 van Rossum I, Dominguez MD, Lieb R, et al. Affective dysregulation and reality distortion: a  
50 629 10-year prospective study of their association and clinical relevance, *Schizophr Bull*  
51 630 2011;37:561-71.
- 52  
53  
54 631 42 Wigman J, Lin A, Vollebergh W, et al. Subclinical psychosis and depression: co-occurring  
55 632 phenomena that do not predict each other over time, *Schizophr Res* 2011;130:277-81.
- 56  
57  
58  
59  
60

- 1  
2  
3 633 43 Werbeloff N, Drukker M, Dohrenwend BP, et al. Self-reported attenuated psychotic  
4 634 symptoms as forerunners of severe mental disorders later in life, *Arch Gen Psychiatry*  
5 635 2012;69:467-75.
- 6  
7  
8 636 44 Addington J, Cornblatt BA, Cadenhead KS, et al. At clinical high risk for psychosis: outcome  
9 637 for nonconverters, *Am J Psychiatry* 2011;168:800-5.
- 10  
11 638 45 Yung AR, Phillips LJ, Yuen HP, et al. Psychosis prediction: 12-month follow up of a high-  
12 639 risk ("prodromal") group, *Schizophr Res* 2003;60:21-32.
- 13  
14  
15 640 46 Yung AR, Phillips LJ, Yuen HP, et al. Risk factors for psychosis in an ultra high-risk group:  
16 641 psychopathology and clinical features, *Schizophr Res* 2004;67:131-42.
- 17  
18  
19 642 47 Demjaha A, Valmaggia L, Stahl D, et al. Disorganization/cognitive and negative symptom  
20 643 dimensions in the at-risk mental state predict subsequent transition to psychosis, *Schizophr Bull*  
21 644 2012;38:351-9.
- 22  
23  
24 645 48 Kessler RC, Birnbaum H, Demler O, et al. The prevalence and correlates of nonaffective  
25 646 psychosis in the National Comorbidity Survey Replication (NCS-R), *Biol Psychiatry*  
26 647 2005;58:668-76.
- 27  
28  
29 648 49 Breetvelt EJ, Boks MP, Numans ME, et al. Schizophrenia risk factors constitute general risk  
30 649 factors for psychiatric symptoms in the population, *Schizophr Res* 2010;120:184-90.
- 31  
32 650 50 Weiser M, van Os J, Davidson M. Time for a shift in focus in schizophrenia: from narrow  
33 651 phenotypes to broad endophenotypes, *Br J Psychiatry* 2005;187:203-5.
- 34  
35  
36 652 51 Craddock N, O'Donovan MC, Owen MJ. Psychosis genetics: modeling the relationship  
37 653 between schizophrenia, bipolar disorder, and mixed (or "schizoaffective") psychoses, *Schizophr*  
38 654 *Bull* 2009;35:482-90.
- 39  
40 655 52 Hill SK, Reilly JL, Harris MS, et al. A comparison of neuropsychological dysfunction in first-  
41 656 episode psychosis patients with unipolar depression, bipolar disorder, and schizophrenia,  
42 657 *Schizophr Res* 2009;113:167-75.
- 43  
44  
45 658 53 Bystritsky A, Nierenberg A, Feusner J, et al. Computational non-linear dynamical psychiatry:  
46 659 a new methodological paradigm for diagnosis and course of illness, *J Psychiatr Res*  
47 660 2012;46:428-35.
- 48  
49  
50 661 54 Strobl EV, Eack SM, Swaminathan V, et al. Predicting the risk of psychosis onset: advances  
51 662 and prospects, *Early intervention in psychiatry* 2012;6:368-79.
- 52  
53 663 55 Fusar-Poli P, Borgwardt S, Bechdolf A, et al. The psychosis high-risk state: a comprehensive  
54 664 state-of-the-art review, *JAMA psychiatry* 2013;70:107-20.
- 55  
56  
57  
58  
59  
60



- 1  
2  
3 665 56 Barnaby N, McGorry PD, Wichers M, et al. Moving from static to dynamic models of the  
4 666 onset of mental disorder, In press.
- 5  
6  
7 667 57 Nelson B, McGorry PD, Wichers M, et al. Moving From Static to Dynamic Models of the  
8 668 Onset of Mental Disorder: A Review, *Jama psychiatry* 2017;74:528-34.
- 9  
10  
11 669 58 Guloksuz S, Pries L, van Os J. Application of network methods for understanding mental  
12 670 disorders: pitfalls and promise, *Psychol Med* 2017:1-10.
- 13  
14 671 59 Borsboom D, Cramer AO. Network analysis: an integrative approach to the structure of  
15 672 psychopathology, *Annual review of clinical psychology* 2013;9:91-121.
- 16  
17  
18 673 60 Borsboom D, Cramer AO, Schmittmann VD, et al. The small world of psychopathology, *PloS*  
19 674 *one* 2011;6:e27407.
- 20  
21 675 61 van Os J, Kenis G, Rutten BP. The environment and schizophrenia, *Nature* 2010;468:203-12.
- 22  
23  
24 676 62 Wigman J, Kelleher I, Devlin N, et al. Coping as a moderating factor between psychotic  
25 677 symptoms and functioning in adolescents with mental illness. 2013;22:S108-9.
- 26  
27 678 63 Roe D, Yanos PT, Lysaker PH. Coping with psychosis: an integrative developmental  
28 679 framework, *J Nerv Ment Dis* 2006;194:917-24.
- 29  
30  
31 680 64 Yanos P, Moos R. Determinants of functioning and well-being among individuals with  
32 681 schizophrenia: an integrated model, *Clin Psychol Rev* 2007;27:58-77.
- 33  
34 682 65 Barabási A, Frangos J. Linked: the new science of networks science of networks: Basic  
35 683 Books 2014.
- 36  
37  
38 684 66 Barabási A. Bursts: the hidden patterns behind everything we do, from your e-mail to bloody  
39 685 crusades: Penguin 2010.
- 40  
41 686 67 Schmittmann VD, Cramer AO, Waldorp LJ, et al. Deconstructing the construct: A network  
42 687 perspective on psychological phenomena, *New Ideas Psychol* 2013;31:43-53.
- 43  
44  
45 688 68 Yung AR, Nelson B, Thompson A, et al. The psychosis threshold in Ultra High Risk  
46 689 (prodromal) research: is it valid? *Schizophr Res* 2010;120:1-6.
- 47  
48  
49 690 69 Oorschot M, Lataster T, Thewissen V, et al. Symptomatic remission in psychosis and real-life  
50 691 functioning, *Br J Psychiatry* 2012;201:215-20.
- 51  
52  
53 692 70 Verma S, Subramaniam M, Abidin E, et al. Symptomatic and functional remission in patients  
54 693 with first-episode psychosis, *Acta Psychiatr Scand* 2012;126:282-9.
- 55  
56 694 71 Wunderink L, Nieboer RM, Wiersma D, et al. Recovery in remitted first-episode psychosis at  
57 695 7 years of follow-up of an early dose reduction/discontinuation or maintenance treatment

- 1  
2  
3 696 strategy: long-term follow-up of a 2-year randomized clinical trial, *JAMA psychiatry*  
4 697 2013;70:913-20.  
5  
6  
7 698 72 Konings M, Bak M, Hanssen M, et al. Validity and reliability of the CAPE: a self-report  
8 699 instrument for the measurement of psychotic experiences in the general population, *Acta*  
9 700 *Psychiatr Scand* 2006;114:55-61.  
10  
11  
12 701 73 Ising HK, Veling W, Loewy RL, et al. The validity of the 16-item version of the Prodromal  
13 702 Questionnaire (PQ-16) to screen for ultra high risk of developing psychosis in the general help-  
14 703 seeking population, *Schizophr Bull* 2012;38:1288-96.  
15  
16  
17 704 74 Yung AR, Yung AR, Pan Yuen H, et al. Mapping the onset of psychosis: the comprehensive  
18 705 assessment of at-risk mental states, *Aust N Z J Psychiatry* 2005;39:964-71.  
19  
20  
21 706 75 Wigman JT, Vollebergh WA, Raaijmakers QA, et al. The structure of the extended psychosis  
22 707 phenotype in early adolescence--a cross-sample replication, *Schizophr Bull* 2011;37:850-60.  
23  
24  
25 708 76 Oorschot M, Kwapil T, Delespaul P, et al. Momentary assessment research in psychosis.  
26 709 *Psychol Assess* 2009;21:498.  
27  
28  
29 710 77 Myin-Germeys I, Marcelis M, Krabbendam L, et al. Subtle fluctuations in psychotic  
30 711 phenomena as functional states of abnormal dopamine reactivity in individuals at risk, *Biol*  
31 712 *Psychiatry* 2005;58:105-10.  
32  
33  
34 713 78 Wigman JT, Collip D, Wichers M, et al. Altered transfer of momentary mental states  
35 714 (ATOMS) as the basic unit of psychosis liability in interaction with environment and emotions,  
36 715 *PLoS One* 2013;8:e54653.  
37  
38  
39 716 79 Kroenke K, Spitzer RL, Williams JB. The Phq-9, *Journal of general internal medicine*  
40 717 2001;16:606-13.  
41  
42  
43 718 80 Zigmond AS, Snaith RP. The hospital anxiety and depression scale, *Acta Psychiatr Scand*  
44 719 1983;67:361-70.  
45  
46  
47 720 81 American Psychiatric Association. Diagnostic and statistical manual of mental disorders  
48 721 (DSM-5®): American Psychiatric Pub 2013.  
49  
50  
51 722 82 Yik M, Russell JA, Steiger JH. A 12-point circumplex structure of core affect. *Emotion*  
52 723 2011;11:705.  
53  
54  
55 724 83 Feldman Barrett L, Russell JA. Independence and bipolarity in the structure of current affect.  
56 725 *J Pers Soc Psychol* 1998;74:967.  
57  
58  
59 726 84 Derogatis LR, Unger R. Symptom checklist-90-revised, *Corsini encyclopedia of psychology*  
60 727 2010.



- 1  
2  
3 728 85 Nienhuis FJ, van de Willige G, Rijnders CA, et al. Validity of a short clinical interview for  
4 729 psychiatric diagnosis: the mini-SCAN, *Br J Psychiatry* 2010;196:64-8.
- 6  
7 730 86 De Jong A, Lubbe PM. Groningse vragenlijst over sociaal gedrag:  
8 731 zelfbeoordelingsvragenlijsten voor het vaststellen van problemen in het interpersoonlijke  
9 732 functioneren: handleiding: Rob Giel Onderzoekcentrum 2001.
- 11  
12 733 87 Diener E, Wirtz D, Tov W, et al. New well-being measures: Short scales to assess flourishing  
13 734 and positive and negative feelings, *Soc Indicators Res* 2010;97:143-56.
- 15  
16 735 88 Lovibond PF, Lovibond SH. The structure of negative emotional states: Comparison of the  
17 736 Depression Anxiety Stress Scales (DASS) with the Beck Depression and Anxiety Inventories,  
18 737 *Behav Res Ther* 1995;33:335-43.
- 20  
21 738 89 Altman EG, Hedeker D, Peterson JL, et al. The Altman self-rating mania scale, *Biol*  
22 739 *Psychiatry* 1997;42:948-55.
- 24  
25 740 90 van Sonderen E. Sociale Steun Lijst-Interacties (SSL-I) en Sociale Steun Lijst-Discrepanties  
26 741 (SSL-D): Noorderlijk Centrum voor Gezondheidsvraagstukken, Groningen 1993.
- 28  
29 742 91 Smith BW, Dalen J, Wiggins K, et al. The brief resilience scale: assessing the ability to  
30 743 bounce back, *Int J Behav Med* 2008;15:194-200.
- 32  
33 744 92 Schreurs P, Van de Willige G. Omgaan met problemen en gebeurtenissen. De Utrechtse  
34 745 Coping Lijst (UCL)(Coping with problems and events. The Utrecht Coping List (UCL)), 1998.
- 36  
37 746 93 Roenneberg T, Kuehnle T, Juda M, et al. Epidemiology of the human circadian clock, *Sleep*  
38 747 *Medicine Reviews* 2007;11:429-38.
- 40  
41 748 94 Rosmalen J, Bos E, De Jonge P. Validation of the Long-term Difficulties Inventory (LDI) and  
42 749 the List of Threatening Experiences (LTE) as measures of stress in epidemiological population-  
43 750 based cohort studies, *Psychol Med* 2012;42:2599-608.
- 45  
46 751 95 Stone VE, Baron-Cohen S, Knight RT. Frontal lobe contributions to theory of mind, *J Cogn*  
47 752 *Neurosci* 1998;10:640-56.
- 49  
50 753 96 Armsden GC, Greenberg MT. The inventory of parent and peer attachment: Individual  
51 754 differences and their relationship to psychological well-being in adolescence, *Journal of youth*  
52 755 *and adolescence* 1987;16:427-54.
- 54  
55 756 97 Deković M, Noom MJ, Meeus W. Expectations regarding development during adolescence:  
56 757 Parental and adolescent perceptions, *Journal of youth and adolescence* 1997;26:253-72.
- 58  
59 758 98 Brandt PT. Multiple time series models: Sage 2007.
- 60

- 1  
2  
3 759 99 Opsahl T, Agneessens F, Skvoretz J. Node centrality in weighted networks: Generalizing  
4 760 degree and shortest paths, *Social networks* 2010;32:245-51.
- 6  
7 761 100 Epskamp S, Cramer A, Waldorp L, et al. Qgraph: network representations of relationships in  
8 762 data, *R package version 0.4* 2011;10.
- 10  
11 763 101 Wit E, Abbruzzo A. Factorial graphical lasso for dynamic networks, *arXiv preprint*  
12 764 *arXiv:1205.2911* 2012.
- 14  
15 765 102 van Gils A, Burton C, Bos EH, et al. Individual variation in temporal relationships between  
16 766 stress and functional somatic symptoms, *J Psychosom Res* 2014;77:34-9.
- 18  
19 767 103 Bouwmans ME, Bos EH, Booij SH, et al. Intra-and inter-individual variability of  
20 768 longitudinal daytime melatonin secretion patterns in depressed and non-depressed individuals,  
21 769 *Chronobiol Int* 2015;32:441-6.
- 23  
24 770 104 Honaker J, King G, Blackwell M. Amelia II: A program for missing data, *Journal of*  
25 771 *statistical software* 2011;45:Retrieved from <http://www.jstatsoft.org/v45/i07>.
- 27  
28 772 105 Rosmalen JG, Wenting AM, Roest AM, et al. Revealing causal heterogeneity using time  
29 773 series analysis of ambulatory assessments: application to the association between depression and  
30 774 physical activity after myocardial infarction, *Psychosom Med* 2012;74:377-86.
- 32  
33 775 106 Bos EH, Hoenders R, de Jonge P. Wind direction and mental health: a time-series analysis  
34 776 of weather influences in a patient with anxiety disorder, *BMJ Case Rep*  
35 777 2012;2012:10.1136/bcr.2012-006300.
- 37  
38 778 107 Lütkepohl H. New introduction to multiple time series analysis, 2005.
- 40  
41 779 108 Snijders TB, Bosker R. R.(1999). Multilevel analysis: An introduction to basic and advanced  
42 780 multilevel modeling.
- 44  
45 781 109 Wigman JT, van Os J, Thiery E, et al. Psychiatric diagnosis revisited: towards a system of  
46 782 staging and profiling combining nomothetic and idiographic parameters of momentary mental  
47 783 states, *PLoS One* 2013;8:e59559.
- 49  
50 784 110 Hsu LM. Random sampling, randomization, and equivalence of contrasted groups in  
51 785 psychotherapy outcome research. *J Consult Clin Psychol* 1989;57:131.
- 53  
54 786 111 Insel T, Cuthbert B, Garvey M, et al. Research domain criteria (RDoC): toward a new  
55 787 classification framework for research on mental disorders, *Am J Psychiatry* 2010;167:748-51.
- 57  
58 788 112 McGorry PD, Hickie IB, Yung AR, et al. Clinical staging of psychiatric disorders: a  
59 789 heuristic framework for choosing earlier, safer and more effective interventions, *Aust N Z J*  
60 790 *Psychiatry* 2006;40:616-22.

1  
2  
3 791 113 Boertien D. Herstel en empowerment (Recovery and empowerment). In: Veling W, Van der  
4 792 Wal M, Jansen S, et al., eds. Handboek Vroege Psychose (Manual for early psychosis) 2013.

5  
6  
7 793

8  
9 794

10  
11 795 **Authors' contributions**

12  
13 796 JTWW conceived the study. JTWW and SHB designed and are executing the study and drafted  
14  
15 797 the first versions of the manuscript. LW, PdJ, JvO, MCW helped conceptualize the study and  
16  
17 798 provided general advice and input, SS contributed to the study design, specifically to the data  
18  
19 799 gathering and data management part. All authors critically reviewed the manuscript, and  
20  
21 800 collaborated in the discussion of the intellectual content of the manuscript. All authors read and  
22  
23 801 approved the final manuscript.  
24  
25  
26

27 802

28  
29  
30 803 **Funding**

31  
32 804 This work was supported by the Netherlands Organization for Scientific Research (NWO) (Veni  
33  
34 805 Dr. J.T.W. Wigman: no. 016.156.019). In addition, M. Wichers was supported by an H2020  
35  
36 806 European Research Council Consolidator Grant (ERC-CoG-2015, project 681466 – TRANS-ID).  
37  
38 807 The funders had no role in the study design, data collection and analysis, decision to publish, or  
39  
40 808 the preparation of the manuscript.  
41  
42  
43

44 809

45  
46 810 **Competing interests**

47  
48 811 The authors declare that they have no competing interests.  
49  
50  
51

52 812

53  
54 813

1  
2  
3  
4  
5  
6  
7  
8  
9  
10  
11  
12  
13  
14  
15  
16  
17  
18  
19  
20  
21  
22  
23  
24  
25  
26  
27  
28  
29  
30  
31  
32  
33  
34  
35  
36  
37  
38  
39  
40  
41  
42  
43  
44  
45  
46  
47  
48  
49  
50  
51  
52  
53  
54  
55  
56  
57  
58  
59  
60

814 **Tables**

For peer review only

815 Table 1. Overview of instruments.

| Domain                 | Instrument       | Method | Purpose            | Time (min) | Screening | Diary pre (baseline) | Diary post | Follow-up 1     | Diary pre      | Diary post | Follow-up 2     | Follow-up 3     |
|------------------------|------------------|--------|--------------------|------------|-----------|----------------------|------------|-----------------|----------------|------------|-----------------|-----------------|
|                        |                  |        |                    |            | T0        | T0                   | T0         | T1              | T1             | T1         | T2              | T3              |
|                        |                  |        |                    |            |           |                      | (3m)       |                 |                | (3m)       |                 |                 |
| <i>Demo-graphics</i>   | Gen. Health      | SR     | Demogr, conf.      | 5          | X         |                      |            |                 | X <sup>†</sup> |            |                 |                 |
|                        | Vignette         | INT    | History psychosis  | 5          | X**       |                      |            |                 |                |            |                 |                 |
| <i>Psychosis</i>       | CAPE             | SR     | Psychotic Sx       | 6          | X         |                      | X          | X               |                | X          | X               | X               |
|                        | PQ               | SR     | Clinical stage     | 3          |           | X <sup>†</sup>       |            | X <sup>†</sup>  |                |            | X <sup>†</sup>  | X <sup>†</sup>  |
|                        | CAARMS           | INT    | Clinical stage     | 30-90      |           | X* <sup>†</sup>      |            | X* <sup>†</sup> |                |            | X* <sup>†</sup> | X* <sup>†</sup> |
| <i>Psychopathology</i> | Mini-SCAN        | INT    | Diagnosis          | 30         |           | X                    |            | X               |                |            | X               | X               |
|                        | SCL-90           | SR     | Severity           | 20         |           | X                    |            | X               |                |            | X               | X               |
|                        | PsychCaseReg     | REG    | Care use           | -          |           | X                    |            | X               |                |            | X               | X               |
|                        | Care use - extra | SR     | Care use           | 1          |           | X                    |            | X               |                |            | X               | X               |
|                        | DASS             | SR     | Depress Anxiety Sx | 3          |           | X                    | X          |                 | X              | X          |                 |                 |
|                        | ASRM             | SR     | Mania Sx           | 3          |           | X                    | X          |                 | X              | X          |                 |                 |

1  
2  
3  
4  
5  
6  
7  
8  
9  
10  
11  
12  
13  
14  
15  
16  
17  
18  
19  
20  
21  
22  
23  
24  
25  
26  
27  
28  
29  
30  
31  
32  
33  
34  
35  
36  
37  
38  
39  
40  
41  
42  
43  
44  
45  
46  
47  
48  
49

Table 1. Continued.

| Domain                       | Instrument     | Method | Purpose             | Time (min) | Screening | Diary pre (baseline) | Diary post | Follow-up 1 | Diary pre | Diary post | Follow-up 2 | Follow-up 3 |
|------------------------------|----------------|--------|---------------------|------------|-----------|----------------------|------------|-------------|-----------|------------|-------------|-------------|
| <i>Social functioning</i>    | GVSG-45        | SR     | Social functioning  | 8          |           | X                    |            | X           |           |            | X           | X           |
|                              | Flourishing Sc | SR     | Well-being          | 1          |           | X                    |            | X           |           |            | X           | X           |
| <i>Risk &amp; resilience</i> | SSL            | SR     | Social support      | 7          |           | X                    | X          |             | X         | X          |             |             |
|                              | IPPA           | SR     | Bonding             | 9          |           | X <sup>#</sup>       |            |             |           |            |             |             |
|                              | BRS            | SR     | Resilience          | 2          |           | X                    | X          |             | X         | X          |             |             |
|                              | UCL            | SR     | Coping              | 5          |           | X                    | X          |             | X         | X          |             |             |
|                              | Brugha LTE     | SR     | Life events, trauma | 4          |           | X                    |            |             |           | X          |             |             |
|                              | MCTQ           | SR     | Sleep               | 3          |           | X                    |            |             |           | X          |             |             |
|                              | Faux-Pas Task  | INT    | Social Cognition    | 5          |           | X <sup>#</sup>       |            |             |           |            |             |             |
|                              | Actical®       | SENS   | Physical activity   | -          |           |                      |            |             |           | X***       |             |             |

816 Note. SR = Self-report, INT = Interview, REG = register, SENS = sensor Sx = symptoms, demogr = demographics, conf =

817 confounders, depress = depression, T = measurement wave, m = months.

1  
2  
3 818 \* Only administered when PQ score is 6 or higher.  
4  
5

6 819 \*\* Only administered when there is a history of a psychiatric disorder according to the information on the General Health  
7  
8

9 820 Questionnaire  
10

11  
12 821 \*\*\* Offered to participants as optional.  
13  
14

15 822 † Available as ROM data for all individuals in clinical care for mental health at each measurement wave.  
16  
17

18 823 ‡ Send out several weeks before the daily diary period to screen on exclusion criteria  
19  
20

21  
22 824 # Administered only to subgroup 4  
23  
24

25 825  
26  
27  
28  
29  
30  
31  
32  
33  
34  
35  
36  
37  
38  
39  
40  
41  
42  
43  
44  
45  
46  
47  
48  
49

1  
2  
3 826 **Figure titles and legends**  
4  
5

6 827  
7  
8

9  
10 828 Figure 1. Parameters of a theoretical symptom network.  
11

12  
13 829 Note. This figure is for illustrative purposes, and is not based on real data.  
14  
15

16 830  
17  
18

19 831  
20  
21

22 832 Figure 2. Flowchart.  
23  
24

25  
26 833 Note. Light grey area within blue dashed square indicates optional measurements.  
27  
28

29 834  
30  
31

32 835  
33  
34

35 836 Figure 3. Definition of subgroups.  
36  
37

38  
39 837  
40  
41  
42  
43  
44  
45  
46  
47  
48  
49  
50  
51  
52  
53  
54  
55  
56  
57  
58  
59  
60



1  
2  
3 838 **Additional files**  
4  
5

6 839  
7  
8

9  
10 840 Additional file 1.docx  
11

12  
13 841 Title: Table S1. Diary items  
14

15  
16 842 Description: Original Dutch diary items and their translation to English  
17  
18  
19  
20  
21  
22  
23  
24  
25  
26  
27  
28  
29  
30  
31  
32  
33  
34  
35  
36  
37  
38  
39  
40  
41  
42  
43  
44  
45  
46  
47  
48  
49  
50  
51  
52  
53  
54  
55  
56  
57  
58  
59  
60

For peer review only

1  
2  
3  
4  
5  
6  
7  
8  
9  
10  
11  
12  
13  
14  
15  
16  
17  
18  
19  
20  
21  
22  
23  
24  
25  
26  
27  
28  
29  
30  
31  
32  
33  
34  
35  
36  
37  
38  
39  
40  
41  
42  
43  
44  
45  
46  
47  
48  
49  
50  
51  
52  
53  
54  
55  
56  
57  
58  
59  
60

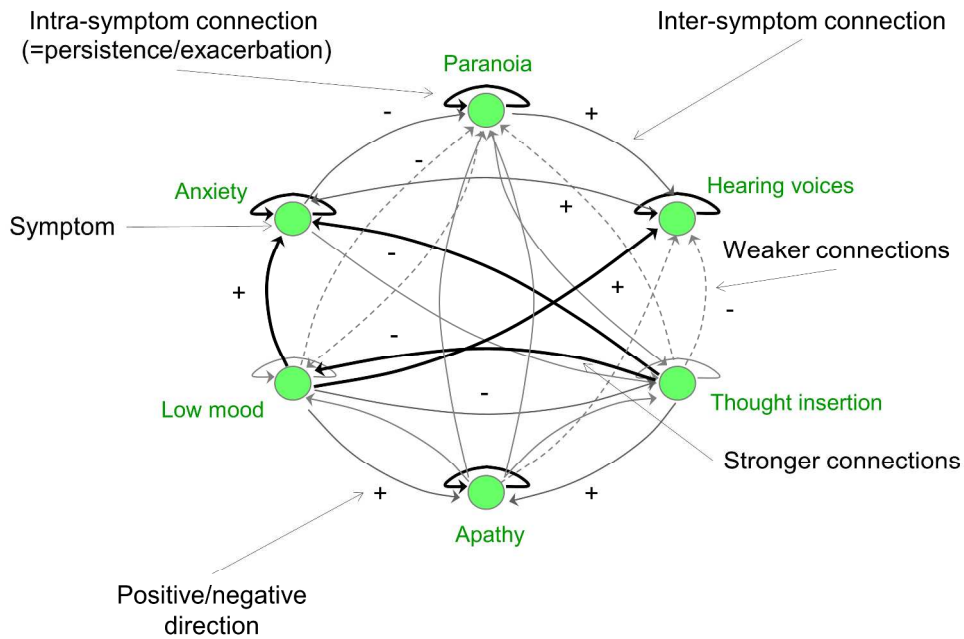

Figure 1. Parameters of a theoretical symptom network. Note. This figure is for illustrative purposes, and is not based on real data.

254x190mm (300 x 300 DPI)

1  
2  
3  
4  
5  
6  
7  
8  
9  
10  
11  
12  
13  
14  
15  
16  
17  
18  
19  
20  
21  
22  
23  
24  
25  
26  
27  
28  
29  
30  
31  
32  
33  
34  
35  
36  
37  
38  
39  
40  
41  
42  
43  
44  
45  
46  
47  
48  
49  
50  
51  
52  
53  
54  
55  
56  
57  
58  
59  
60

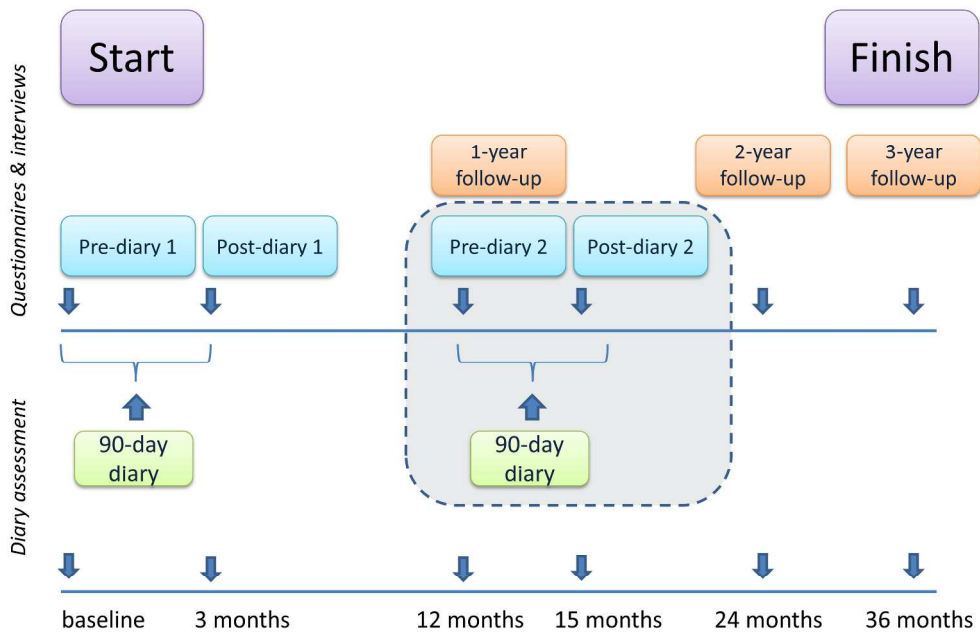

Figure 2. Flowchart. Note. Light grey area within blue dashed square indicates optional measurements.

254x190mm (300 x 300 DPI)

1  
2  
3  
4  
5  
6  
7  
8  
9  
10  
11  
12  
13  
14  
15  
16  
17  
18  
19  
20  
21  
22  
23  
24  
25  
26  
27  
28  
29  
30  
31  
32  
33  
34  
35  
36  
37  
38  
39  
40  
41  
42  
43  
44  
45  
46  
47  
48  
49  
50  
51  
52  
53  
54  
55  
56  
57  
58  
59  
60

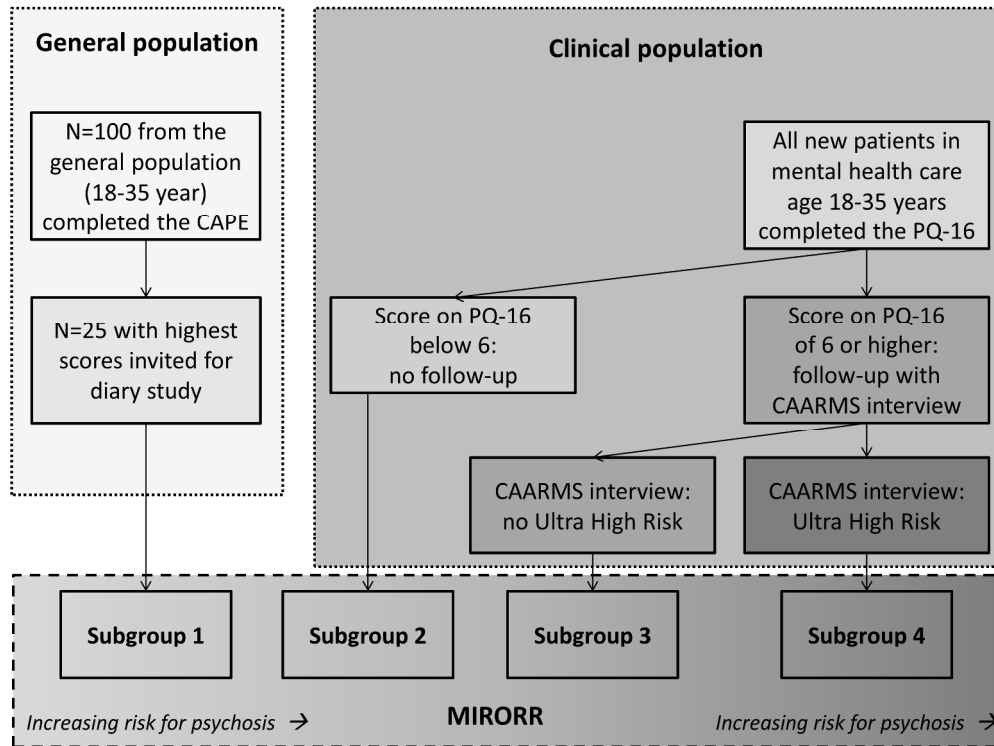

Figure 3. Definition of subgroups.

254x190mm (300 x 300 DPI)

ew only

Supplementary Table S1. Diary items.

| Question | Dutch                                                   | Translation                                            | Response range                                                                                      | Range   | Description      |
|----------|---------------------------------------------------------|--------------------------------------------------------|-----------------------------------------------------------------------------------------------------|---------|------------------|
| 1        | Ik voel me nu                                           | Right now, I feel                                      | Very unpleasant – Very pleasant                                                                     | 0 - 100 | Momentary affect |
| 2        | Ik voel me nu                                           | Right now, I feel                                      | Very restless / excited – Very quit/calm                                                            | 0 - 100 | Momentary affect |
| 3        | Op mijn beste moment van vandaag voelde ik mij          | During my best moment of the day, I felt               | Very unpleasant – Very pleasant                                                                     | 0 - 100 | Momentary affect |
| 4        | Op mijn beste moment van vandaag voelde ik mij          | During my best moment of the day, I felt               | Very restless / excited – Very quit/calm                                                            | 0 - 100 | Momentary affect |
| 5        | Wanneer was dit beste moment ongeveer? Ergens in de     | Around when was this best moment?<br>Somewhere in the  | <ul style="list-style-type: none"> <li>• Morning</li> <li>• Afternoon</li> <li>• Evening</li> </ul> | 1, 2, 3 | Momentary affect |
| 6        | Op mijn slechtste moment van vandaag voelde ik mij      | During my worst moment of the day, I felt              | Very unpleasant – Very pleasant                                                                     | 0 - 100 | Momentary affect |
| 7        | Op mijn slechtste moment van vandaag voelde ik mij      | During my worst moment of the day, I felt              | Very restless/ excited – Very quit/calm                                                             | 0 - 100 | Momentary affect |
| 8        | Wanneer was dit slechtste moment ongeveer? Ergens in de | Around when was this worst moment?<br>Somewhere in the | <ul style="list-style-type: none"> <li>• Morning</li> <li>• Afternoon</li> <li>• Evening</li> </ul> | 1, 2, 3 | Momentary affect |
| 9        | Heb je afgelopen nacht goed                             | Did you sleep well tonight?                            | Not at all – Very well                                                                              | 0 - 100 | Sleep            |

|    |                    |                            |                               |                        |         |              |
|----|--------------------|----------------------------|-------------------------------|------------------------|---------|--------------|
| 1  |                    | geslapen?                  |                               |                        |         |              |
| 2  |                    |                            |                               |                        |         |              |
| 3  |                    |                            |                               |                        |         |              |
| 4  | 10                 | Hoeveel uur heb je         | About how many                | Hours, minutes         | 0 - 24  | Sleep        |
| 5  |                    | afgelopen nacht            | hours did you sleep           |                        |         |              |
| 6  |                    | ongeveer geslapen?         | tonight?                      |                        |         |              |
| 7  |                    |                            |                               |                        |         |              |
| 8  | 11                 | Heb je vandaag             | Did you sleep during          | • No (skip to 13)      | 0 - 1   | Sleep        |
| 9  |                    | overdag geslapen?          | the day today (naps)?         | • Yes                  |         |              |
| 10 |                    | (dutjes)                   |                               |                        |         |              |
| 11 | 12                 | Hoe lang in totaal?        | How long in total did         | Hours, minutes         | 0 - 12  | Sleep        |
| 12 |                    |                            | you sleep during the          |                        |         |              |
| 13 |                    |                            | day today?                    |                        |         |              |
| 14 |                    |                            |                               |                        |         |              |
| 15 | <i>Instruction</i> | <i>Alle items gaan</i>     | <i>From now on, all</i>       |                        |         |              |
| 16 |                    | <i>vanaf nu over de</i>    | <i>items involve the past</i> |                        |         |              |
| 17 |                    | <i>afgelopen dag (denk</i> | <i>day (think about how</i>   |                        |         |              |
| 18 |                    | <i>aan hoe je je</i>       | <i>you felt on average</i>    |                        |         |              |
| 19 |                    | <i>vandaag gemiddeld</i>   | <i>today)</i>                 |                        |         |              |
| 20 |                    | <i>voelde)</i>             |                               |                        |         |              |
| 21 |                    |                            |                               |                        |         |              |
| 22 | 13                 | Ik voelde me               | I felt relaxed today          | Not at all – Very much | 0 – 100 | Positive     |
| 23 |                    | vandaag ontspannen         |                               |                        |         | deactivation |
| 24 | 14                 | Ik voelde me               | I felt calm today             | Not at all – Very much | 0 – 100 | Positive     |
| 25 |                    | vandaag kalm               |                               |                        |         | deactivation |
| 26 | 15                 | Ik voelde me               | I felt satisfied today        | Not at all – Very much | 0 – 100 | Positive     |
| 27 |                    | vandaag tevreden           |                               |                        |         | deactivation |
| 28 | 16                 | Ik voelde me               | I felt energetic today        | Not at all – Very much | 0 – 100 | Positive     |
| 29 |                    | vandaag energiek           |                               |                        |         | activation   |
| 30 | 17                 | Ik voelde me               | I felt enthusiastic           | Not at all – Very much | 0 – 100 | Positive     |
| 31 |                    | vandaag enthousiast        | today                         |                        |         | activation   |
| 32 | 18                 | Ik voelde me               | I felt cheerful today         | Not at all – Very much | 0 – 100 | Positive     |
| 33 |                    | vandaag opgewekt           |                               |                        |         | activation   |
| 34 | 19                 | Ik voelde me               | I felt apathetic today        | Not at all – Very much | 0 – 100 | Negative     |
| 35 |                    | vandaag lusteloos          |                               |                        |         | deactivation |
| 36 | 20                 | Ik voelde me               | I felt tired today            | Not at all – Very much | 0 – 100 | Negative     |
| 37 |                    | vandaag moe                |                               |                        |         | deactivation |
| 38 | 21                 | Ik voelde me               | I felt down today             | Not at all – Very much | 0 – 100 | Negative     |
| 39 |                    |                            |                               |                        |         |              |
| 40 |                    |                            |                               |                        |         |              |
| 41 |                    |                            |                               |                        |         |              |
| 42 |                    |                            |                               |                        |         |              |
| 43 |                    |                            |                               |                        |         |              |
| 44 |                    |                            |                               |                        |         |              |
| 45 |                    |                            |                               |                        |         |              |
| 46 |                    |                            |                               |                        |         |              |
| 47 |                    |                            |                               |                        |         |              |
| 48 |                    |                            |                               |                        |         |              |
| 49 |                    |                            |                               |                        |         |              |

|    |                                               |                                          |                        |         |                         |
|----|-----------------------------------------------|------------------------------------------|------------------------|---------|-------------------------|
|    | vandaag somber                                |                                          |                        |         | deactivation            |
| 22 | Ik voelde me vandaag angstig                  | I felt anxious today                     | Not at all – Very much | 0 – 100 | Negative activation     |
| 23 | Ik voelde me vandaag onrustig                 | I felt restless today                    | Not at all – Very much | 0 – 100 | Negative activation     |
| 24 | Ik voelde me vandaag prikkelbaar              | I felt irritable today                   | Not at all – Very much | 0 – 100 | Negative activation     |
| 25 | Ik voelde me vandaag geïrriteerd              | I felt irritated today                   | Not at all – Very much | 0 – 100 | Irritation              |
| 26 | Ik voelde me vandaag spraakzaam               | I felt talkative today                   | Not at all – Very much | 0 – 100 | Spontaneity             |
| 27 | Ik voelde me vandaag zelfverzekerd            | I felt confident today                   | Not at all – Very much | 0 – 100 | Self confidence         |
| 28 | Ik voelde me vandaag leeg/vlak                | I felt empty today                       | Not at all – Very much | 0 – 100 | Flat affect / Anhedonia |
| 29 | Ik voelde me vandaag ongerust                 | I felt worried today                     | Not at all – Very much | 0 – 100 | Worrying                |
| 30 | Ik voelde me vandaag erg speciaal             | I felt very special today                | Not at all – Very much | 0 – 100 | Delusions               |
| 31 | Ik voelde me vandaag wantrouwig               | I felt suspicious today                  | Not at all – Very much | 0 – 100 | Delusions               |
| 32 | Ik had vandaag het gevoel te kort te schieten | Today I had the feeling of falling short | Not at all – Very much | 0 – 100 | Worthlessness           |
| 33 | Ik kon vandaag aan wat op mijn pad kwam       | Today I could handle what came my way    | Not at all – Very much | 0 – 100 | Resilience              |
| 34 | Ik kon me vandaag goed concentreren           | I could concentrate well today           | Not at all – Very much | 0 – 100 | Concentration           |

|    |    |                     |                         |                        |         |                |
|----|----|---------------------|-------------------------|------------------------|---------|----------------|
| 1  |    |                     |                         |                        |         |                |
| 2  |    |                     |                         |                        |         |                |
| 3  | 35 | Ik vond mijn leven  | I found my life was     | Not at all – Very much | 0 – 100 | Worthlessness  |
| 4  |    | vandaag de moeite   | worthwhile today        |                        |         |                |
| 5  |    | waard               |                         |                        |         |                |
| 6  |    |                     |                         |                        |         |                |
| 7  | 36 | Ik had vandaag last | I was bothered by       | Not at all – Very much | 0 – 100 | Physical       |
| 8  |    | van lichamelijke    | physical symptoms       |                        |         | discomfort     |
| 9  |    | klachten            | today                   |                        |         |                |
| 10 | 37 | Ik had vandaag de   | Today I had the         | Not at all – Very much | 0 – 100 | Disorganized   |
| 11 |    | neiging iets        | tendency to do          |                        |         | thoughts       |
| 12 |    | onbeheersts te doen | something               |                        |         |                |
| 13 |    |                     | unrestrained/wild       |                        |         |                |
| 14 |    |                     |                         |                        |         |                |
| 15 | 38 | Mijn gedachten      | My thoughts wouldn't    | Not at all – Very much | 0 – 100 | Disorganized   |
| 16 |    | lieten me vandaag   | leave me alone today    |                        |         | thoughts       |
| 17 |    | niet los            |                         |                        |         |                |
| 18 |    |                     |                         |                        |         |                |
| 19 | 39 | Mijn gedachten      | My thoughts were        | Not at all – Very much | 0 – 100 | Disorganized   |
| 20 |    | waren vandaag       | racing today            |                        |         | thoughts       |
| 21 |    | versneld            |                         |                        |         |                |
| 22 |    |                     |                         |                        |         |                |
| 23 | 40 | Mijn gedachten      | My thoughts were        | Not at all – Very much | 0 – 100 | Disorganized   |
| 24 |    | waren vandaag       | difficult to express    |                        |         | thoughts       |
| 25 |    | moeilijk te uiten   | today                   |                        |         |                |
| 26 | 41 | Er is vandaag iets  | Today something         | Not at all – Very much | 1 – 7   | Strange        |
| 27 |    | vreemds met mij of  | strange happened to     |                        |         | impressions /  |
| 28 |    | om mij heen         | me or around me that    |                        |         | Delusions      |
| 29 |    | gebeurd dat ik      | was difficult for me to |                        |         |                |
| 30 |    | moeilijk kon        | explain                 |                        |         |                |
| 31 |    | verklaren           |                         |                        |         |                |
| 32 |    |                     |                         |                        |         |                |
| 33 | 42 | Ik hoorde vandaag   | Today I heard voices    | Not at all – Very much | 1 – 7   | Hallucinations |
| 34 |    | stemmen die         | that others couldn't    |                        |         |                |
| 35 |    | anderen niet        | hear                    |                        |         |                |
| 36 |    | hoorden             |                         |                        |         |                |
| 37 |    |                     |                         |                        |         |                |
| 38 | 43 | Ik zag vandaag      | Today I saw things      | Not at all – Very much | 1 – 7   | Hallucinations |
| 39 |    | dingen die anderen  | that others couldn't    |                        |         |                |
| 40 |    | niet zagen          | see                     |                        |         |                |
| 41 | 44 | Ik had vandaag het  | Today I had the         | Not at all – Very much | 0 – 100 | Paranoia       |
| 42 |    |                     |                         |                        |         |                |
| 43 |    |                     |                         |                        |         |                |
| 44 |    |                     |                         |                        |         |                |
| 45 |    |                     |                         |                        |         |                |
| 46 |    |                     |                         |                        |         |                |
| 47 |    |                     |                         |                        |         |                |
| 48 |    |                     |                         |                        |         |                |
| 49 |    |                     |                         |                        |         |                |



|    |    |                     |                          |                                          |                      |
|----|----|---------------------|--------------------------|------------------------------------------|----------------------|
| 1  |    |                     |                          |                                          |                      |
| 2  |    |                     |                          |                                          |                      |
| 3  |    |                     |                          |                                          |                      |
| 4  |    | gevoel dat anderen  | feeling that others did  |                                          |                      |
| 5  |    | me niet mochten     | not like me              |                                          |                      |
| 6  | 45 | Ik had vandaag het  | I felt that others could | Not at all – Very much                   | 0 – 100 Delusions    |
| 7  |    | gevoel dat anderen  | read my thoughts         |                                          |                      |
| 8  |    | mijn gedachten      | today                    |                                          |                      |
| 9  |    | konden lezen        |                          |                                          |                      |
| 10 | 46 | Ik voelde me        | I felt unreal today      | Not at all – Very much                   | 0 – 100 Delusions    |
| 11 |    | vandaag             |                          |                                          |                      |
| 12 |    | onwerkelijk         |                          |                                          |                      |
| 13 | 47 | Ik had vandaag het  | I felt that others could | Not at all – Very much                   | 0 – 100 Delusions    |
| 14 |    | gevoel dat anderen  | control me today         |                                          |                      |
| 15 |    | controle over me    |                          |                                          |                      |
| 16 |    | uitoefenden         |                          |                                          |                      |
| 17 | 48 | Ik kon vandaag      | I could experience       | Not at all – Very much                   | 0 – 100 Flat affect  |
| 18 |    | plezier ervaren     | pleasure when nice       |                                          | /anhedonia           |
| 19 |    | wanneer er leuke    | things happened today    |                                          |                      |
| 20 |    | dingen gebeurden    |                          |                                          |                      |
| 21 | 49 | Er kwam vandaag     | I did not get many       | Not at all – Very much                   | 0 – 100 Motivation / |
| 22 |    | weinig uit mijn     | things done today        |                                          | drive                |
| 23 |    | handen              |                          |                                          |                      |
| 24 | 50 | Ik had vandaag zin  | I felt like undertaking  | Not at all – Very much                   | 0 – 100 Motivation / |
| 25 |    | om dingen te        | something to day         |                                          | drive                |
| 26 |    | ondernemen          |                          |                                          |                      |
| 27 | 51 | Ik deed dingen ‘op  | I did things on          | Not at all – Very much                   | 0 – 100 Mindfulness  |
| 28 |    | de automatische     | automatic without        |                                          |                      |
| 29 |    | piloot’, zonder mij | being conscious of       |                                          |                      |
| 30 |    | erg bewust te zijn  | what I was doing         |                                          |                      |
| 31 |    | van wat ik aan het  | today                    |                                          |                      |
| 32 |    | doen was            |                          |                                          |                      |
| 33 | 52 | Mijn eetlust was    | My appetite today was    | Smaller than normal – Larger than normal | 0 – 100 Appetite     |
| 34 |    | vandaag             |                          |                                          |                      |
| 35 | 53 | Hoe gestrest was je | How stressed were        | Not at all – Very much                   | 0 – 100 Stress       |
| 36 |    | vandaag?            | you today?               |                                          |                      |
| 37 |    |                     |                          |                                          |                      |
| 38 |    |                     |                          |                                          |                      |
| 39 |    |                     |                          |                                          |                      |
| 40 |    |                     |                          |                                          |                      |
| 41 |    |                     |                          |                                          |                      |
| 42 |    |                     |                          |                                          |                      |
| 43 |    |                     |                          |                                          |                      |
| 44 |    |                     |                          |                                          |                      |
| 45 |    |                     |                          |                                          |                      |
| 46 |    |                     |                          |                                          |                      |
| 47 |    |                     |                          |                                          |                      |
| 48 |    |                     |                          |                                          |                      |
| 49 |    |                     |                          |                                          |                      |

|    |                    |                           |                             |                                   |                         |
|----|--------------------|---------------------------|-----------------------------|-----------------------------------|-------------------------|
| 1  |                    |                           |                             |                                   |                         |
| 2  |                    |                           |                             |                                   |                         |
| 3  | 54                 | In welke mate zijn        | To what extent did          | Not at all – Very much            | 0 – 100 Positive events |
| 4  |                    | er vandaag positieve      | positive events happen      |                                   |                         |
| 5  |                    | gebeurtenissen            | today?                      |                                   |                         |
| 6  |                    | geweest?                  |                             |                                   |                         |
| 7  |                    |                           |                             |                                   |                         |
| 8  | <i>Instruction</i> | <i>Denk aan de</i>        | <i>Think about the most</i> |                                   |                         |
| 9  |                    | <i>belangrijkste</i>      | <i>important positive</i>   |                                   |                         |
| 10 |                    | <i>positieve</i>          | <i>event of today</i>       |                                   |                         |
| 11 |                    | <i>gebeurtenis van de</i> |                             |                                   |                         |
| 12 |                    | <i>afgelopen dag</i>      |                             |                                   |                         |
| 13 |                    |                           |                             |                                   |                         |
| 14 | 55                 | Hoe plezierig was         | How pleasant was this       | Neutral – Very pleasant           | 0 – 100 Positive events |
| 15 |                    | deze gebeurtenis?         | event?                      |                                   |                         |
| 16 | 56                 | Hoe belangrijk was        | How important was           | Very unimportant – Very important | 0 – 100 Positive events |
| 17 |                    | deze gebeurtenis          | this positive event to      |                                   |                         |
| 18 |                    | voor mij?                 | me?                         |                                   |                         |
| 19 |                    |                           |                             |                                   |                         |
| 20 | 57                 | Was deze positieve        | Was this positive           | • No (skip to 59)                 | 0 - 1 Positive events   |
| 21 |                    | gebeurtenis               | event planned?              | • Yes                             |                         |
| 22 |                    | gepland?                  |                             |                                   |                         |
| 23 |                    |                           |                             |                                   |                         |
| 24 | 58                 | Ik keek er naar uit       | I was looking forward       | Not at all – Very much            | 0 – 100 Positive events |
| 25 |                    |                           | to it                       |                                   |                         |
| 26 | 59                 | In welke mate zijn        | To what extent did          | Not at all – Very much            | 0 – 100 Negative events |
| 27 |                    | er vandaag                | negative events             |                                   |                         |
| 28 |                    | negatieve                 | happen today?               |                                   |                         |
| 29 |                    | gebeurtenissen            |                             |                                   |                         |
| 30 |                    | geweest?                  |                             |                                   |                         |
| 31 |                    |                           |                             |                                   |                         |
| 32 | <i>Instruction</i> | <i>Denk aan de</i>        | <i>Think about the most</i> |                                   |                         |
| 33 |                    | <i>belangrijkste</i>      | <i>important negative</i>   |                                   |                         |
| 34 |                    | <i>negatieve</i>          | <i>event of today</i>       |                                   |                         |
| 35 |                    | <i>gebeurtenis van de</i> |                             |                                   |                         |
| 36 |                    | <i>afgelopen dag</i>      |                             |                                   |                         |
| 37 |                    |                           |                             |                                   |                         |
| 38 | 60                 | Hoe onplezierig was       | How unpleasant was          | Very unpleasant - Neutral         | 0 – 100 Negative events |
| 39 |                    | deze gebeurtenis?         | this event?                 |                                   |                         |
| 40 | 61                 | Hoe belangrijk was        | How important was           | Very unimportant – Very important | 0 – 100 Negative events |
| 41 |                    | deze gebeurtenis          | this negative event to      |                                   |                         |
| 42 |                    |                           |                             |                                   |                         |
| 43 |                    |                           |                             |                                   |                         |
| 44 |                    |                           |                             |                                   |                         |
| 45 |                    |                           |                             |                                   |                         |
| 46 |                    |                           |                             |                                   |                         |
| 47 |                    |                           |                             |                                   |                         |
| 48 |                    |                           |                             |                                   |                         |
| 49 |                    |                           |                             |                                   |                         |

|    |    |                                                                                                      |                                                              |                                                                                                                                                                                                                                                                                                                                                                                                                                                                           |                                       |                        |
|----|----|------------------------------------------------------------------------------------------------------|--------------------------------------------------------------|---------------------------------------------------------------------------------------------------------------------------------------------------------------------------------------------------------------------------------------------------------------------------------------------------------------------------------------------------------------------------------------------------------------------------------------------------------------------------|---------------------------------------|------------------------|
| 1  |    |                                                                                                      |                                                              |                                                                                                                                                                                                                                                                                                                                                                                                                                                                           |                                       |                        |
| 2  |    |                                                                                                      |                                                              |                                                                                                                                                                                                                                                                                                                                                                                                                                                                           |                                       |                        |
| 3  |    |                                                                                                      |                                                              |                                                                                                                                                                                                                                                                                                                                                                                                                                                                           |                                       |                        |
| 4  | 62 | voor mij?<br>Was deze negatieve<br>gebeurtenis<br>gepland?                                           | me?<br>Was this negative<br>event planned?                   | <ul style="list-style-type: none"> <li>• No (skip to 59)</li> <li>• Yes</li> </ul>                                                                                                                                                                                                                                                                                                                                                                                        | 0 - 1                                 | Negative<br>events     |
| 5  |    |                                                                                                      |                                                              |                                                                                                                                                                                                                                                                                                                                                                                                                                                                           |                                       |                        |
| 6  |    |                                                                                                      |                                                              |                                                                                                                                                                                                                                                                                                                                                                                                                                                                           |                                       |                        |
| 7  |    |                                                                                                      |                                                              |                                                                                                                                                                                                                                                                                                                                                                                                                                                                           |                                       |                        |
| 8  |    |                                                                                                      |                                                              |                                                                                                                                                                                                                                                                                                                                                                                                                                                                           |                                       |                        |
| 9  | 63 | Ik zag er tegen op                                                                                   | I dreaded it                                                 | Not at all – Very much                                                                                                                                                                                                                                                                                                                                                                                                                                                    | 0 – 100                               | Negative<br>events     |
| 10 |    |                                                                                                      |                                                              |                                                                                                                                                                                                                                                                                                                                                                                                                                                                           |                                       |                        |
| 11 | 64 | Welke gebeurtenis<br>was het meest<br>spannend of<br>stressvol?                                      | Which event was most<br>exciting or stressful?               | <ul style="list-style-type: none"> <li>• The negative event</li> <li>• The positive event</li> </ul>                                                                                                                                                                                                                                                                                                                                                                      | 1 - 2                                 | Event<br>stressfulness |
| 12 |    |                                                                                                      |                                                              |                                                                                                                                                                                                                                                                                                                                                                                                                                                                           |                                       |                        |
| 13 |    |                                                                                                      |                                                              |                                                                                                                                                                                                                                                                                                                                                                                                                                                                           |                                       |                        |
| 14 |    |                                                                                                      |                                                              |                                                                                                                                                                                                                                                                                                                                                                                                                                                                           |                                       |                        |
| 15 | 65 | Hoe stressvol of<br>spannend was deze<br>gebeurtenis?                                                | How stressful or<br>exciting was this<br>event?              | Not at all – Very much                                                                                                                                                                                                                                                                                                                                                                                                                                                    | 0 – 100                               | Event<br>stressfulness |
| 16 |    |                                                                                                      |                                                              |                                                                                                                                                                                                                                                                                                                                                                                                                                                                           |                                       |                        |
| 17 |    |                                                                                                      |                                                              |                                                                                                                                                                                                                                                                                                                                                                                                                                                                           |                                       |                        |
| 18 |    |                                                                                                      |                                                              |                                                                                                                                                                                                                                                                                                                                                                                                                                                                           |                                       |                        |
| 19 | 66 | Hoe ben je met deze<br>(stressvolle)<br>gebeurtenis<br>omgegaan? Ik ben<br>hiermee omgegaan<br>door: | How did you cope<br>with this event? I dealt<br>with this by | <ul style="list-style-type: none"> <li>• Actively addressing or solving the situation</li> <li>• Talking to someone</li> <li>• Avoiding the situation</li> <li>• Seeking distraction (e.g. exercise, smoking, watching television)</li> <li>• Thinking about it a lot</li> <li>• Expressing my frustration</li> <li>• Reassuring myself or by putting things in perspective</li> <li>• Gently observing and accepting my feelings</li> <li>• None of the above</li> </ul> | 0 – 1<br>for<br>every<br>check<br>box | Coping                 |
| 20 |    |                                                                                                      |                                                              |                                                                                                                                                                                                                                                                                                                                                                                                                                                                           |                                       |                        |
| 21 |    |                                                                                                      |                                                              |                                                                                                                                                                                                                                                                                                                                                                                                                                                                           |                                       |                        |
| 22 |    |                                                                                                      |                                                              |                                                                                                                                                                                                                                                                                                                                                                                                                                                                           |                                       |                        |
| 23 |    |                                                                                                      |                                                              |                                                                                                                                                                                                                                                                                                                                                                                                                                                                           |                                       |                        |
| 24 |    |                                                                                                      |                                                              |                                                                                                                                                                                                                                                                                                                                                                                                                                                                           |                                       |                        |
| 25 |    |                                                                                                      |                                                              |                                                                                                                                                                                                                                                                                                                                                                                                                                                                           |                                       |                        |
| 26 |    |                                                                                                      |                                                              |                                                                                                                                                                                                                                                                                                                                                                                                                                                                           |                                       |                        |
| 27 |    |                                                                                                      |                                                              |                                                                                                                                                                                                                                                                                                                                                                                                                                                                           |                                       |                        |
| 28 |    |                                                                                                      |                                                              |                                                                                                                                                                                                                                                                                                                                                                                                                                                                           |                                       |                        |
| 29 |    |                                                                                                      |                                                              |                                                                                                                                                                                                                                                                                                                                                                                                                                                                           |                                       |                        |
| 30 |    |                                                                                                      |                                                              |                                                                                                                                                                                                                                                                                                                                                                                                                                                                           |                                       |                        |
| 31 |    |                                                                                                      |                                                              |                                                                                                                                                                                                                                                                                                                                                                                                                                                                           |                                       |                        |
| 32 |    |                                                                                                      |                                                              |                                                                                                                                                                                                                                                                                                                                                                                                                                                                           |                                       |                        |
| 33 |    |                                                                                                      |                                                              |                                                                                                                                                                                                                                                                                                                                                                                                                                                                           |                                       |                        |
| 34 |    |                                                                                                      |                                                              |                                                                                                                                                                                                                                                                                                                                                                                                                                                                           |                                       |                        |
| 35 | 67 | Hoeveel ben ik<br>vandaag alleen<br>geweest?                                                         | How much was I alone<br>today?                               | Not for a moment – The whole day<br>(if “Not for a moment”, skip to 69)<br>(if “The whole day”, go to 68, and thereafter<br>skip to 70)                                                                                                                                                                                                                                                                                                                                   | 1 - 7                                 | Social context         |
| 36 |    |                                                                                                      |                                                              |                                                                                                                                                                                                                                                                                                                                                                                                                                                                           |                                       |                        |
| 37 |    |                                                                                                      |                                                              |                                                                                                                                                                                                                                                                                                                                                                                                                                                                           |                                       |                        |
| 38 |    |                                                                                                      |                                                              |                                                                                                                                                                                                                                                                                                                                                                                                                                                                           |                                       |                        |
| 39 |    |                                                                                                      |                                                              |                                                                                                                                                                                                                                                                                                                                                                                                                                                                           |                                       |                        |
| 40 | 68 | Ik was liever wat<br>meer in gezelschap                                                              | I would have preferred<br>more company                       | Not at all – Very much                                                                                                                                                                                                                                                                                                                                                                                                                                                    | 0 – 100                               | Social context         |
| 41 |    |                                                                                                      |                                                              |                                                                                                                                                                                                                                                                                                                                                                                                                                                                           |                                       |                        |
| 42 |    |                                                                                                      |                                                              |                                                                                                                                                                                                                                                                                                                                                                                                                                                                           |                                       |                        |
| 43 |    |                                                                                                      |                                                              |                                                                                                                                                                                                                                                                                                                                                                                                                                                                           |                                       |                        |
| 44 |    |                                                                                                      |                                                              |                                                                                                                                                                                                                                                                                                                                                                                                                                                                           |                                       |                        |
| 45 |    |                                                                                                      |                                                              |                                                                                                                                                                                                                                                                                                                                                                                                                                                                           |                                       |                        |
| 46 |    |                                                                                                      |                                                              |                                                                                                                                                                                                                                                                                                                                                                                                                                                                           |                                       |                        |
| 47 |    |                                                                                                      |                                                              |                                                                                                                                                                                                                                                                                                                                                                                                                                                                           |                                       |                        |
| 48 |    |                                                                                                      |                                                              |                                                                                                                                                                                                                                                                                                                                                                                                                                                                           |                                       |                        |
| 49 |    |                                                                                                      |                                                              |                                                                                                                                                                                                                                                                                                                                                                                                                                                                           |                                       |                        |

|    |                    |                          |                              |                                                                                                                                                                                                                                                |         |                    |
|----|--------------------|--------------------------|------------------------------|------------------------------------------------------------------------------------------------------------------------------------------------------------------------------------------------------------------------------------------------|---------|--------------------|
| 1  |                    | geweest                  |                              |                                                                                                                                                                                                                                                |         |                    |
| 2  |                    |                          |                              |                                                                                                                                                                                                                                                |         |                    |
| 3  |                    |                          |                              |                                                                                                                                                                                                                                                |         |                    |
| 4  |                    | Ik vond het              | I found today's              | Very unpleasant – Very pleasant                                                                                                                                                                                                                | 0 – 100 | Social context     |
| 5  | 69                 | gezelschap van           | company mostly               |                                                                                                                                                                                                                                                |         |                    |
| 6  |                    | vandaag                  |                              |                                                                                                                                                                                                                                                |         |                    |
| 7  |                    | overwegend               |                              |                                                                                                                                                                                                                                                |         |                    |
| 8  |                    |                          |                              |                                                                                                                                                                                                                                                |         |                    |
| 9  | 70                 | Voelde je je             | Did you feel supported       | Not at all – Very much                                                                                                                                                                                                                         | 0 – 100 | Social context     |
| 10 |                    | vandaag gesteund?        | today?                       |                                                                                                                                                                                                                                                |         |                    |
| 11 | 71                 | Ik had liever meer       | I would have liked to        | Not at all – Very much                                                                                                                                                                                                                         | 0 – 100 | Social context     |
| 12 |                    | steun gevoeld            | feel more support            |                                                                                                                                                                                                                                                |         |                    |
| 13 | 72                 | Heb je vandaag met       | Have you had a               | <ul style="list-style-type: none"> <li>• No (skip to 78)</li> <li>• Yes</li> </ul>                                                                                                                                                             | 0 – 1   | Social context     |
| 14 |                    | iemand een gesprek       | conversation with            |                                                                                                                                                                                                                                                |         |                    |
| 15 |                    | gevoerd?                 | someone today?               |                                                                                                                                                                                                                                                |         |                    |
| 16 | <i>Instruction</i> | <i>Denk aan het voor</i> | <i>Think about the most</i>  |                                                                                                                                                                                                                                                |         |                    |
| 17 |                    | <i>jou belangrijkste</i> | <i>important</i>             |                                                                                                                                                                                                                                                |         |                    |
| 18 |                    | <i>gesprek van</i>       | <i>conversation of today</i> |                                                                                                                                                                                                                                                |         |                    |
| 19 |                    | <i>vandaag (mag ook</i>  |                              |                                                                                                                                                                                                                                                |         |                    |
| 20 |                    | <i>via telefoon of</i>   |                              |                                                                                                                                                                                                                                                |         |                    |
| 21 |                    | <i>mobiele</i>           |                              |                                                                                                                                                                                                                                                |         |                    |
| 22 |                    | <i>berichtenapp)</i>     |                              |                                                                                                                                                                                                                                                |         |                    |
| 23 |                    |                          |                              |                                                                                                                                                                                                                                                |         |                    |
| 24 | 73                 | Met wie was dit          | With whom was this           | <ul style="list-style-type: none"> <li>• Family (except partner)               <ul style="list-style-type: none"> <li>○ Father</li> <li>○ Mother</li> <li>○ Other</li> </ul> </li> <li>• Partner</li> <li>• Friend</li> <li>• Other</li> </ul> | 1 - 7   | Social context     |
| 25 |                    | gesprek?                 | conversation?                |                                                                                                                                                                                                                                                |         |                    |
| 26 |                    |                          |                              |                                                                                                                                                                                                                                                |         |                    |
| 27 |                    |                          |                              |                                                                                                                                                                                                                                                |         |                    |
| 28 |                    |                          |                              |                                                                                                                                                                                                                                                |         |                    |
| 29 |                    |                          |                              |                                                                                                                                                                                                                                                |         |                    |
| 30 |                    |                          |                              |                                                                                                                                                                                                                                                |         |                    |
| 31 |                    |                          |                              |                                                                                                                                                                                                                                                |         |                    |
| 32 |                    |                          |                              |                                                                                                                                                                                                                                                |         |                    |
| 33 |                    |                          |                              |                                                                                                                                                                                                                                                |         |                    |
| 34 |                    |                          |                              |                                                                                                                                                                                                                                                |         |                    |
| 35 | 74                 | Hoe kritisch was         | How critical was this        | Not at all – Very much                                                                                                                                                                                                                         | 0 – 100 | Expressed emotions |
| 36 |                    | deze persoon naar        | person towards you?          |                                                                                                                                                                                                                                                |         |                    |
| 37 |                    | jou toe?                 |                              |                                                                                                                                                                                                                                                |         |                    |
| 38 | 75                 | Hoe warm was deze        | How warm was this            | Not at all – Very much                                                                                                                                                                                                                         | 0 – 100 | Expressed emotions |
| 39 |                    | persoon naar jou         | person towards you?          |                                                                                                                                                                                                                                                |         |                    |
| 40 |                    | toe?                     |                              |                                                                                                                                                                                                                                                |         |                    |
| 41 |                    |                          |                              |                                                                                                                                                                                                                                                |         |                    |
| 42 | 76                 | In welke mate            | To what extent did this      | Not at all – Very much                                                                                                                                                                                                                         | 0 – 100 | Expressed          |
| 43 |                    |                          |                              |                                                                                                                                                                                                                                                |         |                    |
| 44 |                    |                          |                              |                                                                                                                                                                                                                                                |         |                    |
| 45 |                    |                          |                              |                                                                                                                                                                                                                                                |         |                    |
| 46 |                    |                          |                              |                                                                                                                                                                                                                                                |         |                    |
| 47 |                    |                          |                              |                                                                                                                                                                                                                                                |         |                    |
| 48 |                    |                          |                              |                                                                                                                                                                                                                                                |         |                    |
| 49 |                    |                          |                              |                                                                                                                                                                                                                                                |         |                    |

|                    |                                               |                                           |                                                                                                                                                                                                                                 |         |                       |
|--------------------|-----------------------------------------------|-------------------------------------------|---------------------------------------------------------------------------------------------------------------------------------------------------------------------------------------------------------------------------------|---------|-----------------------|
|                    | bemoeide deze persoon zich teveel met jou?    | person interfere too much with you        |                                                                                                                                                                                                                                 |         | emotions              |
| 77                 | Ik voel me verbonden met deze persoon         | I felt connected with this person         | Not at all – Very much                                                                                                                                                                                                          | 0 – 100 | Social context        |
| 78                 | Ik heb vandaag de volgende middelen gebruikt: | I have used the following substance today | <ul style="list-style-type: none"> <li>• Prescribed medication</li> <li>• Alcohol</li> <li>• Hash/Cannabis</li> <li>• Stimulating drugs</li> <li>• Calming drugs</li> <li>• Other drugs</li> <li>• None of the above</li> </ul> |         | Substance use         |
| 79                 | Ik ben vandaag lichamelijk actief geweest     | I have been physically active today       | Not at all – Very much                                                                                                                                                                                                          | 0 – 100 | Physical activity     |
| 80                 | Heb je vandaag goed kunnen functioneren?      | Were you able to function well today?     | Not at all – Very much                                                                                                                                                                                                          | 0 – 100 | Functioning           |
| <i>Instruction</i> | <i>Het volgende item gaat over morgen</i>     | <i>The next item is about tomorrow</i>    |                                                                                                                                                                                                                                 |         |                       |
| 81                 | Ik heb zin in morgen                          | I look forward to tomorrow                | Not at all – Very much                                                                                                                                                                                                          | 0 – 100 | Interest / motivation |

STROBE Statement—Checklist of items that should be included in reports of *cohort studies*

|                                 | Item No | Recommendation                                                                                                                                                                                                                                                                                                                                                                                                |
|---------------------------------|---------|---------------------------------------------------------------------------------------------------------------------------------------------------------------------------------------------------------------------------------------------------------------------------------------------------------------------------------------------------------------------------------------------------------------|
| <b>Title and abstract</b>       | 1       | (a) Indicate the study's design with a commonly used term in the title or the abstract<br>(b) Provide in the abstract an informative and balanced summary of what was done and what was found                                                                                                                                                                                                                 |
| <b>Introduction</b>             |         |                                                                                                                                                                                                                                                                                                                                                                                                               |
| <b>Background/rationale</b>     | 2       | Explain the scientific background and rationale for the investigation being reported                                                                                                                                                                                                                                                                                                                          |
| <b>Objectives</b>               | 3       | State specific objectives, including any prespecified hypotheses                                                                                                                                                                                                                                                                                                                                              |
| <b>Methods</b>                  |         |                                                                                                                                                                                                                                                                                                                                                                                                               |
| <b>Study design</b>             | 4       | Present key elements of study design early in the paper                                                                                                                                                                                                                                                                                                                                                       |
| <b>Setting</b>                  | 5       | Describe the setting, locations, and relevant dates, including periods of recruitment, exposure, follow-up, and data collection                                                                                                                                                                                                                                                                               |
| <b>Participants</b>             | 6       | (a) Give the eligibility criteria, and the sources and methods of selection of participants. Describe methods of follow-up<br>(b) For matched studies, give matching criteria and number of exposed and unexposed                                                                                                                                                                                             |
| <b>Variables</b>                | 7       | Clearly define all outcomes, exposures, predictors, potential confounders, and effect modifiers. Give diagnostic criteria, if applicable                                                                                                                                                                                                                                                                      |
| <b>Data sources/measurement</b> | 8*      | For each variable of interest, give sources of data and details of methods of assessment (measurement). Describe comparability of assessment methods if there is more than one group                                                                                                                                                                                                                          |
| <b>Bias</b>                     | 9       | Describe any efforts to address potential sources of bias                                                                                                                                                                                                                                                                                                                                                     |
| <b>Study size</b>               | 10      | Explain how the study size was arrived at                                                                                                                                                                                                                                                                                                                                                                     |
| <b>Quantitative variables</b>   | 11      | Explain how quantitative variables were handled in the analyses. If applicable, describe which groupings were chosen and why                                                                                                                                                                                                                                                                                  |
| <b>Statistical methods</b>      | 12      | (a) Describe all statistical methods, including those used to control for confounding<br>(b) Describe any methods used to examine subgroups and interactions<br>(c) Explain how missing data were addressed<br>(d) If applicable, explain how loss to follow-up was addressed<br>(e) Describe any sensitivity analyses                                                                                        |
| <b>Results</b>                  |         |                                                                                                                                                                                                                                                                                                                                                                                                               |
| Participants                    | 13*     | (a) Report numbers of individuals at each stage of study—eg numbers potentially eligible, examined for eligibility, confirmed eligible, included in the study, completing follow-up, and analysed<br>(b) Give reasons for non-participation at each stage<br>(c) Consider use of a flow diagram                                                                                                               |
| Descriptive data                | 14*     | (a) Give characteristics of study participants (eg demographic, clinical, social) and information on exposures and potential confounders<br>(b) Indicate number of participants with missing data for each variable of interest<br>(c) Summarise follow-up time (eg, average and total amount)                                                                                                                |
| Outcome data                    | 15*     | Report numbers of outcome events or summary measures over time                                                                                                                                                                                                                                                                                                                                                |
| Main results                    | 16      | (a) Give unadjusted estimates and, if applicable, confounder-adjusted estimates and their precision (eg, 95% confidence interval). Make clear which confounders were adjusted for and why they were included<br>(b) Report category boundaries when continuous variables were categorized<br>(c) If relevant, consider translating estimates of relative risk into absolute risk for a meaningful time period |

|                          |    |                                                                                                                                                                            |
|--------------------------|----|----------------------------------------------------------------------------------------------------------------------------------------------------------------------------|
| Other analyses           | 17 | Report other analyses done—eg analyses of subgroups and interactions, and sensitivity analyses                                                                             |
| <b>Discussion</b>        |    |                                                                                                                                                                            |
| Key results              | 18 | Summarise key results with reference to study objectives                                                                                                                   |
| Limitations              | 19 | Discuss limitations of the study, taking into account sources of potential bias or imprecision. Discuss both direction and magnitude of any potential bias                 |
| Interpretation           | 20 | Give a cautious overall interpretation of results considering objectives, limitations, multiplicity of analyses, results from similar studies, and other relevant evidence |
| Generalisability         | 21 | Discuss the generalisability (external validity) of the study results                                                                                                      |
| <b>Other information</b> |    |                                                                                                                                                                            |
| Funding                  | 22 | Give the source of funding and the role of the funders for the present study and, if applicable, for the original study on which the present article is based              |

\*Give information separately for exposed and unexposed groups.

**Note:** An Explanation and Elaboration article discusses each checklist item and gives methodological background and published examples of transparent reporting. The STROBE checklist is best used in conjunction with this article (freely available on the Web sites of PLoS Medicine at <http://www.plosmedicine.org/>, Annals of Internal Medicine at <http://www.annals.org/>, and Epidemiology at <http://www.epidem.com/>). Information on the STROBE Initiative is available at <http://www.strobe-statement.org>.
