# Supplementary material for: Study protocol for a prospective cohort study examining the predictive potential of dynamic symptom networks for the onset and progression of psychosis: the Mapping Individual Routes of Risk and Resilience (Mirorr) study
Source: PubMed Central journal article supplement — BMJ Open. 2018 Jan 21;8(1):e019059. doi: 10.1136/bmjopen-2017-019059 (PMC5781162; doi:10.1136/bmjopen-2017-019059), 2018-01-21
Supplement: bmjopen-2017-019059supp001.pdf [file bmjopen-2017-019059supp001.pdf]

**Supplementary Table S1.** Diary items.

| <b>Question</b> | <b>Dutch</b>                                            | <b>Translation</b>                                     | <b>Response range</b>                                                                               | <b>Range</b> | <b>Description</b> |
|-----------------|---------------------------------------------------------|--------------------------------------------------------|-----------------------------------------------------------------------------------------------------|--------------|--------------------|
| 1               | Ik voel me nu                                           | Right now, I feel                                      | Very unpleasant – Very pleasant                                                                     | 0 - 100      | Momentary affect   |
| 2               | Ik voel me nu                                           | Right now, I feel                                      | Very restless / excited – Very quit/calm                                                            | 0 - 100      | Momentary affect   |
| 3               | Op mijn beste moment van vandaag voelde ik mij          | During my best moment of the day, I felt               | Very unpleasant – Very pleasant                                                                     | 0 - 100      | Momentary affect   |
| 4               | Op mijn beste moment van vandaag voelde ik mij          | During my best moment of the day, I felt               | Very restless / excited – Very quit/calm                                                            | 0 -100       | Momentary affect   |
| 5               | Wanneer was dit beste moment ongeveer? Ergens in de     | Around when was this best moment?<br>Somewhere in the  | <ul style="list-style-type: none"> <li>• Morning</li> <li>• Afternoon</li> <li>• Evening</li> </ul> | 1, 2, 3      | Momentary affect   |
| 6               | Op mijn slechtste moment van vandaag voelde ik mij      | During my worst moment of the day, I felt              | Very unpleasant – Very pleasant                                                                     | 0 - 100      | Momentary affect   |
| 7               | Op mijn slechtste moment van vandaag voelde ik mij      | During my worst moment of the day, I felt              | Very restless/ excited – Very quit/calm                                                             | 0 -100       | Momentary affect   |
| 8               | Wanneer was dit slechtste moment ongeveer? Ergens in de | Around when was this worst moment?<br>Somewhere in the | <ul style="list-style-type: none"> <li>• Morning</li> <li>• Afternoon</li> <li>• Evening</li> </ul> | 1, 2, 3      | Momentary affect   |
| 9               | Heb je afgelopen nacht goed                             | Did you sleep well tonight?                            | Not at all – Very well                                                                              | 0 - 100      | Sleep              |

|                    |                                                                                                                         |                                                                                                                |                                                                                    |         |                          |
|--------------------|-------------------------------------------------------------------------------------------------------------------------|----------------------------------------------------------------------------------------------------------------|------------------------------------------------------------------------------------|---------|--------------------------|
| 10                 | geslapen?<br>Hoeveel uur heb je<br>afgelopen nacht<br>ongeveer geslapen?                                                | About how many<br>hours did you sleep<br>tonight?                                                              | Hours, minutes                                                                     | 0 - 24  | Sleep                    |
| 11                 | Heb je vandaag<br>overdag geslapen?<br>(dutjes)                                                                         | Did you sleep during<br>the day today (naps)?                                                                  | <ul style="list-style-type: none"> <li>• No (skip to 13)</li> <li>• Yes</li> </ul> | 0 – 1   | Sleep                    |
| 12                 | Hoe lang in totaal?                                                                                                     | How long in total did<br>you sleep during the<br>day today?                                                    | Hours, minutes                                                                     | 0 – 12  | Sleep                    |
| <i>Instruction</i> | <i>Alle items gaan<br/>vanaf nu over de<br/>afgelopen dag (denk<br/>aan hoe je je<br/>vandaag gemiddeld<br/>voelde)</i> | <i>From now on, all<br/>items involve the past<br/>day (think about how<br/>you felt on average<br/>today)</i> |                                                                                    |         |                          |
| 13                 | Ik voelde me<br>vandaag ontspannen                                                                                      | I felt relaxed today                                                                                           | Not at all – Very much                                                             | 0 – 100 | Positive<br>deactivation |
| 14                 | Ik voelde me<br>vandaag kalm                                                                                            | I felt calm today                                                                                              | Not at all – Very much                                                             | 0 – 100 | Positive<br>deactivation |
| 15                 | Ik voelde me<br>vandaag tevreden                                                                                        | I felt satisfied today                                                                                         | Not at all – Very much                                                             | 0 – 100 | Positive<br>deactivation |
| 16                 | Ik voelde me<br>vandaag energiek                                                                                        | I felt energetic today                                                                                         | Not at all – Very much                                                             | 0 – 100 | Positive<br>activation   |
| 17                 | Ik voelde me<br>vandaag enthousiast                                                                                     | I felt enthusiastic<br>today                                                                                   | Not at all – Very much                                                             | 0 – 100 | Positive<br>activation   |
| 18                 | Ik voelde me<br>vandaag opgewekt                                                                                        | I felt cheerful today                                                                                          | Not at all – Very much                                                             | 0 – 100 | Positive<br>activation   |
| 19                 | Ik voelde me<br>vandaag lusteloos                                                                                       | I felt apathetic today                                                                                         | Not at all – Very much                                                             | 0 – 100 | Negative<br>deactivation |
| 20                 | Ik voelde me<br>vandaag moe                                                                                             | I felt tired today                                                                                             | Not at all – Very much                                                             | 0 – 100 | Negative<br>deactivation |
| 21                 | Ik voelde me                                                                                                            | I felt down today                                                                                              | Not at all – Very much                                                             | 0 – 100 | Negative                 |

|    |                                               |                                          |                        |         |                         |
|----|-----------------------------------------------|------------------------------------------|------------------------|---------|-------------------------|
|    | vandaag somber                                |                                          |                        |         | deactivation            |
| 22 | Ik voelde me vandaag angstig                  | I felt anxious today                     | Not at all – Very much | 0 – 100 | Negative activation     |
| 23 | Ik voelde me vandaag onrustig                 | I felt restless today                    | Not at all – Very much | 0 – 100 | Negative activation     |
| 24 | Ik voelde me vandaag prikkelbaar              | I felt irritable today                   | Not at all – Very much | 0 – 100 | Negative activation     |
| 25 | Ik voelde me vandaag geïrriteerd              | I felt irritated today                   | Not at all – Very much | 0 – 100 | Irritation              |
| 26 | Ik voelde me vandaag spraakzaam               | I felt talkative today                   | Not at all – Very much | 0 – 100 | Spontaneity             |
| 27 | Ik voelde me vandaag zelfverzekerd            | I felt confident today                   | Not at all – Very much | 0 – 100 | Self confidence         |
| 28 | Ik voelde me vandaag leeg/vlak                | I felt empty today                       | Not at all – Very much | 0 – 100 | Flat affect / Anhedonia |
| 29 | Ik voelde me vandaag ongerust                 | I felt worried today                     | Not at all – Very much | 0 – 100 | Worrying                |
| 30 | Ik voelde me vandaag erg speciaal             | I felt very special today                | Not at all – Very much | 0 – 100 | Delusions               |
| 31 | Ik voelde me vandaag wantrouwig               | I felt suspicious today                  | Not at all – Very much | 0 – 100 | Delusions               |
| 32 | Ik had vandaag het gevoel te kort te schieten | Today I had the feeling of falling short | Not at all – Very much | 0 – 100 | Worthlessness           |
| 33 | Ik kon vandaag aan wat op mijn pad kwam       | Today I could handle what came my way    | Not at all – Very much | 0 – 100 | Resilience              |
| 34 | Ik kon me vandaag goed concentreren           | I could concentrate well today           | Not at all – Very much | 0 – 100 | Concentration           |

|    |                                                                                         |                                                                                          |                        |         |                                 |
|----|-----------------------------------------------------------------------------------------|------------------------------------------------------------------------------------------|------------------------|---------|---------------------------------|
| 35 | Ik vond mijn leven vandaag de moeite waard                                              | I found my life was worthwhile today                                                     | Not at all – Very much | 0 – 100 | Worthlessness                   |
| 36 | Ik had vandaag last van lichamelijke klachten                                           | I was bothered by physical symptoms today                                                | Not at all – Very much | 0 – 100 | Physical discomfort             |
| 37 | Ik had vandaag de neiging iets onbeheersts te doen                                      | Today I had the tendency to do something unrestrained/wild                               | Not at all – Very much | 0 – 100 | Disorganized thoughts           |
| 38 | Mijn gedachten lieten me vandaag niet los                                               | My thoughts wouldn't leave me alone today                                                | Not at all – Very much | 0 – 100 | Disorganized thoughts           |
| 39 | Mijn gedachten waren vandaag versneld                                                   | My thoughts were racing today                                                            | Not at all – Very much | 0 – 100 | Disorganized thoughts           |
| 40 | Mijn gedachten waren vandaag moeilijk te uiten                                          | My thoughts were difficult to express today                                              | Not at all – Very much | 0 – 100 | Disorganized thoughts           |
| 41 | Er is vandaag iets vreemds met mij of om mij heen gebeurd dat ik moeilijk kon verklaren | Today something strange happened to me or around me that was difficult for me to explain | Not at all – Very much | 1 – 7   | Strange impressions / Delusions |
| 42 | Ik hoorde vandaag stemmen die anderen niet hoorden                                      | Today I heard voices that others couldn't hear                                           | Not at all – Very much | 1 – 7   | Hallucinations                  |
| 43 | Ik zag vandaag dingen die anderen niet zagen                                            | Today I saw things that others couldn't see                                              | Not at all – Very much | 1 – 7   | Hallucinations                  |
| 44 | Ik had vandaag het                                                                      | Today I had the                                                                          | Not at all – Very much | 0 – 100 | Paranoia                        |

---

|    |                                                                                                         |                                                                                        |                                          |         |                        |
|----|---------------------------------------------------------------------------------------------------------|----------------------------------------------------------------------------------------|------------------------------------------|---------|------------------------|
| 45 | gevoel dat anderen me niet mochten<br>Ik had vandaag het gevoel dat anderen mijn gedachten konden lezen | feeling that others did not like me<br>I felt that others could read my thoughts today | Not at all – Very much                   | 0 – 100 | Delusions              |
| 46 | Ik voelde me vandaag onwerkelijk                                                                        | I felt unreal today                                                                    | Not at all – Very much                   | 0 – 100 | Delusions              |
| 47 | Ik had vandaag het gevoel dat anderen controle over me uitoefenden                                      | I felt that others could control me today                                              | Not at all – Very much                   | 0 – 100 | Delusions              |
| 48 | Ik kon vandaag plezier ervaren wanneer er leuke dingen gebeurden                                        | I could experience pleasure when nice things happened today                            | Not at all – Very much                   | 0 – 100 | Flat affect /anhedonia |
| 49 | Er kwam vandaag weinig uit mijn handen                                                                  | I did not get many things done today                                                   | Not at all – Very much                   | 0 – 100 | Motivation / drive     |
| 50 | Ik had vandaag zin om dingen te ondernemen                                                              | I felt like undertaking something to day                                               | Not at all – Very much                   | 0 – 100 | Motivation / drive     |
| 51 | Ik deed dingen ‘op de automatische piloot’, zonder mij erg bewust te zijn van wat ik aan het doen was   | I did things on automatic without being conscious of what I was doing today            | Not at all – Very much                   | 0 – 100 | Mindfulness            |
| 52 | Mijn eetlust was vandaag                                                                                | My appetite today was                                                                  | Smaller than normal – Larger than normal | 0 – 100 | Appetite               |
| 53 | Hoe gestrest was je vandaag?                                                                            | How stressed were you today?                                                           | Not at all – Very much                   | 0 – 100 | Stress                 |

---

|                    |                                                                             |                                                               |                                                                                    |         |                 |
|--------------------|-----------------------------------------------------------------------------|---------------------------------------------------------------|------------------------------------------------------------------------------------|---------|-----------------|
| 54                 | In welke mate zijn er vandaag positieve gebeurtenissen geweest?             | To what extent did positive events happen today?              | Not at all – Very much                                                             | 0 – 100 | Positive events |
| <i>Instruction</i> | <i>Denk aan de belangrijkste positieve gebeurtenis van de afgelopen dag</i> | <i>Think about the most important positive event of today</i> |                                                                                    |         |                 |
| 55                 | Hoe plezierig was deze gebeurtenis?                                         | How pleasant was this event?                                  | Neutral – Very pleasant                                                            | 0 – 100 | Positive events |
| 56                 | Hoe belangrijk was deze gebeurtenis voor mij?                               | How important was this positive event to me?                  | Very unimportant – Very important                                                  | 0 – 100 | Positive events |
| 57                 | Was deze positieve gebeurtenis gepland?                                     | Was this positive event planned?                              | <ul style="list-style-type: none"> <li>• No (skip to 59)</li> <li>• Yes</li> </ul> | 0 - 1   | Positive events |
| 58                 | Ik keek er naar uit                                                         | I was looking forward to it                                   | Not at all – Very much                                                             | 0 – 100 | Positive events |
| 59                 | In welke mate zijn er vandaag negatieve gebeurtenissen geweest?             | To what extent did negative events happen today?              | Not at all – Very much                                                             | 0 – 100 | Negative events |
| <i>Instruction</i> | <i>Denk aan de belangrijkste negatieve gebeurtenis van de afgelopen dag</i> | <i>Think about the most important negative event of today</i> |                                                                                    |         |                 |
| 60                 | Hoe onplezierig was deze gebeurtenis?                                       | How unpleasant was this event?                                | Very unpleasant - Neutral                                                          | 0 – 100 | Negative events |
| 61                 | Hoe belangrijk was deze gebeurtenis                                         | How important was this negative event to                      | Very unimportant – Very important                                                  | 0 – 100 | Negative events |

|    |                                                                                                      |                                                              |                                                                                                                                                                                                                                                                                                                                                                                                                                                                                           |                                       |                        |
|----|------------------------------------------------------------------------------------------------------|--------------------------------------------------------------|-------------------------------------------------------------------------------------------------------------------------------------------------------------------------------------------------------------------------------------------------------------------------------------------------------------------------------------------------------------------------------------------------------------------------------------------------------------------------------------------|---------------------------------------|------------------------|
| 62 | voor mij?<br>Was deze negatieve<br>gebeurtenis<br>gepland?                                           | me?<br>Was this negative<br>event planned?                   | <ul style="list-style-type: none"> <li>• No (skip to 59)</li> <li>• Yes</li> </ul>                                                                                                                                                                                                                                                                                                                                                                                                        | 0 - 1                                 | Negative<br>events     |
| 63 | Ik zag er tegen op                                                                                   | I dreaded it                                                 | Not at all – Very much                                                                                                                                                                                                                                                                                                                                                                                                                                                                    | 0 – 100                               | Negative<br>events     |
| 64 | Welke gebeurtenis<br>was het meest<br>spannend of<br>stressvol?                                      | Which event was most<br>exciting or stressful?               | <ul style="list-style-type: none"> <li>• The negative event</li> <li>• The positive event</li> </ul>                                                                                                                                                                                                                                                                                                                                                                                      | 1 - 2                                 | Event<br>stressfulness |
| 65 | Hoe stressvol of<br>spannend was deze<br>gebeurtenis?                                                | How stressful or<br>exciting was this<br>event?              | Not at all – Very much                                                                                                                                                                                                                                                                                                                                                                                                                                                                    | 0 – 100                               | Event<br>stressfulness |
| 66 | Hoe ben je met deze<br>(stressvolle)<br>gebeurtenis<br>omgegaan? Ik ben<br>hiermee omgegaan<br>door: | How did you cope<br>with this event? I dealt<br>with this by | <ul style="list-style-type: none"> <li>• Actively addressing or solving the<br/>situation</li> <li>• Talking to someone</li> <li>• Avoiding the situation</li> <li>• Seeking distraction (e.g. exercise,<br/>smoking, watching television)</li> <li>• Thinking about it a lot</li> <li>• Expressing my frustration</li> <li>• Reassuring myself or by putting<br/>things in perspective</li> <li>• Gently observing and accepting my<br/>feelings</li> <li>• None of the above</li> </ul> | 0 – 1<br>for<br>every<br>check<br>box | Coping                 |
| 67 | Hoeveel ben ik<br>vandaag alleen<br>geweest?                                                         | How much was I alone<br>today?                               | Not for a moment – The whole day<br>(if “Not for a moment”, skip to 69)<br>(if “The whole day”, go to 68, and thereafter<br>skip to 70)                                                                                                                                                                                                                                                                                                                                                   | 1 - 7                                 | Social context         |
| 68 | Ik was liever wat<br>meer in gezelschap                                                              | I would have preferred<br>more company                       | Not at all – Very much                                                                                                                                                                                                                                                                                                                                                                                                                                                                    | 0 – 100                               | Social context         |

|                    |                                                                                                               |                                                             |                                                                                                                                                                                                                                  |  |         |                    |
|--------------------|---------------------------------------------------------------------------------------------------------------|-------------------------------------------------------------|----------------------------------------------------------------------------------------------------------------------------------------------------------------------------------------------------------------------------------|--|---------|--------------------|
|                    | geweest                                                                                                       |                                                             |                                                                                                                                                                                                                                  |  |         |                    |
| 69                 | Ik vond het gezelschap van vandaag overwegend                                                                 | I found today's company mostly                              | Very unpleasant – Very pleasant                                                                                                                                                                                                  |  | 0 – 100 | Social context     |
| 70                 | Voelde je je vandaag gesteund?                                                                                | Did you feel supported today?                               | Not at all – Very much                                                                                                                                                                                                           |  | 0 – 100 | Social context     |
| 71                 | Ik had liever meer steun gevoeld                                                                              | I would have liked to feel more support                     | Not at all – Very much                                                                                                                                                                                                           |  | 0 – 100 | Social context     |
| 72                 | Heb je vandaag met iemand een gesprek gevoerd?                                                                | Have you had a conversation with someone today?             | <ul style="list-style-type: none"> <li>• No (skip to 78)</li> <li>• Yes</li> </ul>                                                                                                                                               |  | 0 – 1   | Social context     |
| <i>Instruction</i> | <i>Denk aan het voor jou belangrijkste gesprek van vandaag (mag ook via telefoon of mobiele berichtenapp)</i> | <i>Think about the most important conversation of today</i> |                                                                                                                                                                                                                                  |  |         |                    |
| 73                 | Met wie was dit gesprek?                                                                                      | With whom was this conversation?                            | <ul style="list-style-type: none"> <li>• Family (except partner) <ul style="list-style-type: none"> <li>○ Father</li> <li>○ Mother</li> <li>○ Other</li> </ul> </li> <li>• Partner</li> <li>• Friend</li> <li>• Other</li> </ul> |  | 1 - 7   | Social context     |
| 74                 | Hoe kritisch was deze persoon naar jou toe?                                                                   | How critical was this person towards you?                   | Not at all – Very much                                                                                                                                                                                                           |  | 0 – 100 | Expressed emotions |
| 75                 | Hoe warm was deze persoon naar jou toe?                                                                       | How warm was this person towards you?                       | Not at all – Very much                                                                                                                                                                                                           |  | 0 – 100 | Expressed emotions |
| 76                 | In welke mate                                                                                                 | To what extent did this                                     | Not at all – Very much                                                                                                                                                                                                           |  | 0 – 100 | Expressed          |



|                    |                                                     |                                                 |                                                                                                                                                                                                                                 |         |                          |
|--------------------|-----------------------------------------------------|-------------------------------------------------|---------------------------------------------------------------------------------------------------------------------------------------------------------------------------------------------------------------------------------|---------|--------------------------|
|                    | bemoeide deze<br>persoon zich teveel<br>met jou?    | person interfere too<br>much with you           |                                                                                                                                                                                                                                 |         | emotions                 |
| 77                 | Ik voel me<br>verbonden met deze<br>persoon         | I felt connected with<br>this person            | Not at all – Very much                                                                                                                                                                                                          | 0 – 100 | Social context           |
| 78                 | Ik heb vandaag de<br>volgende middelen<br>gebruikt: | I have used the<br>following substance<br>today | <ul style="list-style-type: none"> <li>• Prescribed medication</li> <li>• Alcohol</li> <li>• Hash/Cannabis</li> <li>• Stimulating drugs</li> <li>• Calming drugs</li> <li>• Other drugs</li> <li>• None of the above</li> </ul> |         | Substance use            |
| 79                 | Ik ben vandaag<br>lichamelijk actief<br>geweest     | I have been physically<br>active today          | Not at all – Very much                                                                                                                                                                                                          | 0 – 100 | Physical<br>activity     |
| 80                 | Heb je vandaag<br>goed kunnen<br>functioneren?      | Were you able to<br>function well today?        | Not at all – Very much                                                                                                                                                                                                          | 0 – 100 | Functioning              |
| <i>Instruction</i> | <i>Het volgende item<br/>gaat over morgen</i>       | <i>The next item is about<br/>tomorrow</i>      |                                                                                                                                                                                                                                 |         |                          |
| 81                 | Ik heb zin in<br>morgen                             | I look forward to<br>tomorrow                   | Not at all – Very much                                                                                                                                                                                                          | 0 – 100 | Interest /<br>motivation |
